# Supplementary material for: TextNetTopics Pro, a topic model-based text classification for short text by integration of semantic and document-topic distribution information
Source: Front Genet. 2023 Oct 5;14:1243874. doi: 10.3389/fgene.2023.1243874 (PMC10585361; doi:10.3389/fgene.2023.1243874)
Supplement: Supplementary file 3 [file DataSheet3.xlsx]

## Sheet: TW
BTM
#Clusters	#Genes (Mean)	Accuracy (Mean)	Sensitivity (Mean)	Specifity (Mean)	F-measure (Mean)	Area Under Curve (Mean)	Recall (Mean)	Precision (Mean)	Cohen's kappa (Mean)		Rank
20	142	0.925248	0.917938	0.932621	0.924979	0.977545	0.917938	0.932199	0.850504		0.521248
19	138	0.925248	0.918644	0.931909	0.925024	0.977314	0.918644	0.93161	0.850503		0.521222
18	135	0.92539	0.918362	0.932479	0.925145	0.977226	0.918362	0.932099	0.850787		0.521769
17	131.7	0.925319	0.920198	0.930484	0.925207	0.976928	0.920198	0.930368	0.850643		0.521515
16	125.1	0.924043	0.916102	0.932051	0.923705	0.977006	0.916102	0.931534	0.848094		0.515338
15	119.1	0.922057	0.914831	0.929345	0.921779	0.97652	0.914831	0.928948	0.844121		0.506197
14	113.3	0.923759	0.915395	0.932194	0.923359	0.976198	0.915395	0.931578	0.847527		0.513527
13	108.4	0.924468	0.916808	0.932194	0.924148	0.975954	0.916808	0.931676	0.848944		0.516737
12	101.8	0.924043	0.917514	0.930627	0.923804	0.975259	0.917514	0.930314	0.848092		0.514595
11	94.9	0.922199	0.915254	0.929202	0.921917	0.974962	0.915254	0.928797	0.844405		0.506021
10	87	0.921206	0.913983	0.92849	0.920906	0.973832	0.913983	0.928105	0.842419		0.500997
9	81.2	0.920071	0.911158	0.92906	0.91962	0.973433	0.911158	0.928426	0.840152		0.495532
8	76	0.919362	0.910593	0.928205	0.918948	0.97311	0.910593	0.927603	0.838733		0.492286
7	71.5	0.919362	0.912288	0.926496	0.91907	0.973176	0.912288	0.9261	0.838731		0.492509
6	62	0.917305	0.908333	0.926353	0.916863	0.973131	0.908333	0.925628	0.83462		0.483262
5	55.9	0.917163	0.909605	0.924786	0.916822	0.971314	0.909605	0.924273	0.834335		0.481924
4	47.4	0.91305	0.90904	0.917094	0.912983	0.967788	0.90904	0.917091	0.826103		0.463195
3	39.2	0.909291	0.906356	0.912251	0.909359	0.963636	0.906356	0.912467	0.818584		0.446008
2	30.8	0.900142	0.904237	0.896011	0.900881	0.95299	0.904237	0.897641	0.800275		0.406711
1	20	0.852482	0.834746	0.87037	0.850202	0.902884	0.834746	0.867382	0.705007		0.242692
GSDMM
#Clusters	#Genes (Mean)	Accuracy (Mean)	Sensitivity (Mean)	Specifity (Mean)	F-measure (Mean)	Area Under Curve (Mean)	Recall (Mean)	Precision (Mean)	Cohen's kappa (Mean)		rank
20	132	0.923121	0.919915	0.926353	0.923141	0.977513	0.919915	0.92668	0.846243		0.51209
19	128	0.924397	0.920198	0.928632	0.924343	0.97741	0.920198	0.928727	0.848798		0.517687
18	124	0.925319	0.923023	0.927635	0.925399	0.976808	0.923023	0.928009	0.850639		0.521831
17	118	0.924681	0.919915	0.929487	0.924581	0.976768	0.919915	0.929503	0.849366		0.518577
16	114.6	0.925674	0.921893	0.929487	0.925653	0.977125	0.921893	0.929647	0.85135		0.523463
15	110	0.922411	0.916949	0.92792	0.922242	0.976894	0.916949	0.92785	0.844828		0.508235
14	103.2	0.924468	0.922175	0.926781	0.924562	0.976227	0.922175	0.927168	0.848937		0.517627
13	96.1	0.923688	0.921893	0.925499	0.923808	0.976438	0.921893	0.92595	0.847376		0.514224
12	88.1	0.92305	0.92048	0.925641	0.923122	0.975388	0.92048	0.925946	0.846101		0.51067
11	80.7	0.922057	0.919209	0.924929	0.922098	0.975126	0.919209	0.925139	0.844115		0.505989
10	76.2	0.920355	0.91709	0.923647	0.920368	0.974237	0.91709	0.92387	0.840712		0.497932
9	71.3	0.919858	0.914831	0.924929	0.919746	0.973541	0.914831	0.924861	0.839721		0.495159
8	65.9	0.919007	0.913701	0.924359	0.918858	0.973254	0.913701	0.924297	0.838019		0.491256
7	60	0.919433	0.913983	0.924929	0.919266	0.973428	0.913983	0.924822	0.838871		0.493177
6	49	0.916454	0.915113	0.917806	0.91664	0.96926	0.915113	0.918327	0.832908		0.478679
5	43.4	0.912624	0.910876	0.914387	0.912789	0.965128	0.910876	0.914956	0.825248		0.460554
4	38.5	0.908652	0.908616	0.908689	0.908995	0.960552	0.908616	0.909581	0.817302		0.442466
3	35.3	0.908936	0.908898	0.908974	0.909276	0.959598	0.908898	0.909835	0.81787		0.443146
2	31	0.904113	0.907345	0.900855	0.904792	0.951852	0.907345	0.90246	0.808219		0.421209
1	20	0.868652	0.877119	0.860114	0.870236	0.932014	0.877119	0.863687	0.737282		0.296872
WNTM
#Clusters	#Genes (Mean)	Accuracy (Mean)	Sensitivity (Mean)	Specifity (Mean)	F-measure (Mean)	Area Under Curve (Mean)	Recall (Mean)	Precision (Mean)	Cohen's kappa (Mean)		rank
20	229	0.929858	0.91935	0.940456	0.929414	0.980527	0.91935	0.939809	0.859726		0.544234
19	215	0.930213	0.920621	0.939886	0.929809	0.97936	0.920621	0.939281	0.860435		0.545342
18	205.9	0.929149	0.919492	0.938889	0.928745	0.979376	0.919492	0.938249	0.858307		0.540259
17	197.7	0.929858	0.919492	0.940313	0.929403	0.978917	0.919492	0.93959	0.859727		0.543292
16	188.4	0.931135	0.919915	0.94245	0.930625	0.978649	0.919915	0.941648	0.862281		0.549168
15	179.4	0.929362	0.916808	0.942023	0.928749	0.978707	0.916808	0.941085	0.858736		0.540558
14	168.2	0.927872	0.916243	0.939601	0.927327	0.978397	0.916243	0.938792	0.855756		0.533483
13	157.7	0.927021	0.914266	0.939886	0.926383	0.977912	0.914266	0.938887	0.854056		0.529054
12	147.2	0.925035	0.914407	0.935755	0.924539	0.9771	0.914407	0.934975	0.850082		0.519667
11	135.5	0.925816	0.914407	0.937322	0.925245	0.97724	0.914407	0.936423	0.851643		0.523215
10	124.1	0.921986	0.909605	0.934473	0.921308	0.97656	0.909605	0.933432	0.843986		0.505263
9	112.3	0.923191	0.911582	0.9349	0.922595	0.976321	0.911582	0.933991	0.846396		0.510703
8	101.6	0.92227	0.909181	0.93547	0.921535	0.975886	0.909181	0.934322	0.844554		0.506085
7	91	0.921418	0.909181	0.933761	0.920762	0.975021	0.909181	0.932708	0.842851		0.501939
6	82	0.920071	0.907203	0.933048	0.919337	0.974387	0.907203	0.931904	0.840157		0.495533
5	71	0.91922	0.90904	0.929487	0.918713	0.973553	0.90904	0.928693	0.838451		0.49172
4	60	0.91156	0.903249	0.919943	0.911138	0.968227	0.903249	0.919336	0.823131		0.456736
3	47.1	0.903404	0.900424	0.90641	0.903466	0.960239	0.900424	0.906705	0.806811		0.421337
2	35	0.885957	0.888277	0.883618	0.886593	0.945406	0.888277	0.88508	0.771908		0.353725
1	20	0.824255	0.835311	0.813105	0.826705	0.882182	0.835311	0.818913	0.648473		0.181111
PTM
#Clusters	#Genes (Mean)	Accuracy (Mean)	Sensitivity (Mean)	Specifity (Mean)	F-measure (Mean)	Area Under Curve (Mean)	Recall (Mean)	Precision (Mean)	Cohen's kappa (Mean)		Rank
20	241	0.929858	0.922881	0.936895	0.929652	0.980452	0.922881	0.936611	0.859722		0.544582
19	230	0.927943	0.922034	0.933903	0.927802	0.979782	0.922034	0.933755	0.855891		0.535246
18	217	0.928723	0.91935	0.938177	0.928334	0.979933	0.91935	0.937664	0.857456		0.538633
17	208.2	0.929858	0.922599	0.937179	0.929626	0.979979	0.922599	0.93685	0.859723		0.544276
16	197.2	0.92844	0.919774	0.937179	0.9281	0.980284	0.919774	0.936716	0.856888		0.537547
15	186.2	0.927447	0.918644	0.936325	0.927076	0.979436	0.918644	0.935796	0.854902		0.532353
14	175.2	0.926738	0.91935	0.934188	0.926474	0.979343	0.91935	0.933817	0.853482		0.529148
13	164.6	0.926454	0.919209	0.933761	0.926197	0.978975	0.919209	0.933388	0.852915		0.527632
12	154.6	0.92773	0.919633	0.935897	0.927423	0.979029	0.919633	0.93549	0.855469		0.533576
11	142.6	0.928014	0.920198	0.935897	0.927721	0.978682	0.920198	0.935559	0.856036		0.534771
10	130.6	0.926667	0.91935	0.934046	0.926406	0.978233	0.91935	0.933668	0.85334		0.528217
9	120.4	0.924397	0.917938	0.930912	0.924192	0.977977	0.917938	0.930663	0.8488		0.517705
8	110.6	0.926028	0.918785	0.933333	0.92577	0.977916	0.918785	0.933072	0.852064		0.525147
7	100	0.925461	0.921893	0.92906	0.9255	0.977002	0.921893	0.929313	0.850924		0.522501
6	86	0.92383	0.917373	0.930342	0.923635	0.976319	0.917373	0.930154	0.847666		0.514278
5	76.7	0.922837	0.917373	0.928348	0.922722	0.976032	0.917373	0.928301	0.845678		0.509749
4	63	0.919433	0.913842	0.925071	0.919294	0.973116	0.913842	0.924973	0.83887		0.493038
3	49.1	0.913333	0.90904	0.917664	0.913274	0.965817	0.90904	0.917776	0.826671		0.463493
2	36	0.887163	0.886158	0.888177	0.887466	0.945827	0.886158	0.889093	0.774325		0.357568
1	20	0.844184	0.808616	0.880057	0.838986	0.89504	0.808616	0.8721	0.68846		0.219015
GPU_PDMM																											LDA (TW)
#Clusters	#Genes (Mean)	Accuracy (Mean)	Sensitivity (Mean)	Specifity (Mean)	F-measure (Mean)	Area Under Curve (Mean)	Recall (Mean)	Precision (Mean)	Cohen's kappa (Mean)		Rank																#Clusters	#Genes (Mean)	Accuracy (Mean)	Sensitivity (Mean)	Specifity (Mean)	F-measure (Mean)	Area Under Curve (Mean)	Recall (Mean)	Precision (Mean)	Cohen's kappa (Mean)
20	131	0.925745	0.917232	0.93433	0.925401	0.976421	0.917232	0.933752	0.851498		0.522796																20	219	0.932766	0.92839	0.937179	0.932729	0.980619	0.92839	0.937178	0.865535		0.559009
19	131	0.925745	0.917232	0.93433	0.925401	0.976421	0.917232	0.933752	0.851498		0.522796																19	207.2	0.934184	0.929096	0.939316	0.934093	0.980153	0.929096	0.939234	0.868373		0.565627
18	131	0.925745	0.917232	0.93433	0.925401	0.976421	0.917232	0.933752	0.851498		0.522796																18	199	0.93305	0.930085	0.93604	0.933097	0.980182	0.930085	0.936257	0.866101		0.560327
17	131	0.925745	0.917232	0.93433	0.925401	0.976421	0.917232	0.933752	0.851498		0.522796																17	192	0.932787	0.925424	0.934188	0.929724	0.980371	0.925424	0.934181	0.859578		0.546209
16	131	0.925745	0.917232	0.93433	0.925401	0.976421	0.917232	0.933752	0.851498		0.522796																16	181.8	0.932766	0.931073	0.934473	0.932904	0.979842	0.931073	0.934814	0.865532		0.558867
15	131	0.925745	0.917232	0.93433	0.925401	0.976421	0.917232	0.933752	0.851498		0.522796																15	172.7	0.930993	0.927966	0.934046	0.931021	0.980276	0.927966	0.934212	0.861988		0.550342
14	118	0.924965	0.918644	0.931339	0.92479	0.976221	0.918644	0.931034	0.849935		0.519362																14	162.3	0.932837	0.930508	0.935185	0.93293	0.979854	0.930508	0.935451	0.865675		0.559153
13	112	0.926525	0.91822	0.9349	0.926207	0.97587	0.91822	0.934376	0.853058		0.526158																13	156.6	0.931773	0.928531	0.935043	0.931774	0.979087	0.928531	0.935164	0.863548		0.553402
12	104	0.925957	0.916808	0.935185	0.925561	0.975906	0.916808	0.934516	0.851924		0.523415																12	145	0.931489	0.926977	0.93604	0.931427	0.978915	0.926977	0.936016	0.862982		0.55181
11	90	0.924397	0.914407	0.934473	0.923932	0.975489	0.914407	0.933691	0.848805		0.515914																11	133	0.931348	0.928955	0.933761	0.931422	0.978288	0.928955	0.933991	0.862696		0.550998
10	82.9	0.924184	0.914407	0.934046	0.923727	0.974542	0.914407	0.933298	0.848379		0.51447																10	120	0.930567	0.927966	0.933191	0.93065	0.977584	0.927966	0.933416	0.861136		0.546852
9	74	0.922553	0.914689	0.930484	0.92224	0.973124	0.914689	0.92997	0.845114		0.506576																9	105.6	0.929149	0.925141	0.933191	0.929107	0.97553	0.925141	0.933185	0.858301		0.538748
8	68	0.919716	0.911723	0.927778	0.919367	0.970911	0.911723	0.92718	0.839441		0.492773																8	93.1	0.92695	0.925424	0.92849	0.927099	0.973463	0.925424	0.928863	0.853901		0.527618
7	62	0.918652	0.909463	0.92792	0.918214	0.969036	0.909463	0.9272	0.837315		0.487055																7	82.4	0.926028	0.923588	0.92849	0.926117	0.971561	0.923588	0.928727	0.852058		0.522217
6	56.1	0.916879	0.910734	0.923077	0.91669	0.966461	0.910734	0.9228	0.833765		0.478511																6	72.4	0.922624	0.920763	0.924501	0.922748	0.96879	0.920763	0.924856	0.845249		0.505358
5	51	0.91617	0.911158	0.921225	0.916075	0.965823	0.911158	0.921133	0.832345		0.475318																5	62	0.921206	0.922175	0.920228	0.921578	0.967258	0.922175	0.921081	0.842408		0.498624
4	44	0.913546	0.909181	0.917949	0.913513	0.96388	0.909181	0.917997	0.827096		0.46343																4	51	0.917021	0.91935	0.914672	0.91753	0.964351	0.91935	0.915843	0.834037		0.479147
3	33.9	0.905532	0.897034	0.914103	0.905099	0.957954	0.897034	0.913382	0.811075		0.427829																3	48	0.91773	0.920621	0.914815	0.918283	0.96371	0.920621	0.916039	0.835454		0.481915
2	27.8	0.884397	0.879379	0.889459	0.884279	0.943297	0.879379	0.889405	0.7688		0.346957																2	34.3	0.899149	0.899153	0.899145	0.899474	0.952594	0.899153	0.899987	0.798296		0.402369
1	20	0.85922	0.863277	0.855128	0.860382	0.915707	0.863277	0.857744	0.718425		0.265841																1	20	0.852482	0.818503	0.886752	0.847811	0.902545	0.818503	0.879435	0.705047		0.24028
GPU_DMM																											LSI (TW)
#Clusters	#Genes (Mean)	Accuracy (Mean)	Sensitivity (Mean)	Specifity (Mean)	F-measure (Mean)	Area Under Curve (Mean)	Recall (Mean)	Precision (Mean)	Cohen's kappa (Mean)		Rank																#Clusters	#Genes (Mean)	Accuracy (Mean)	Sensitivity (Mean)	Specifity (Mean)	F-measure (Mean)	Area Under Curve (Mean)	Recall (Mean)	Precision (Mean)	Cohen's kappa (Mean)
20	131	0.928227	0.922175	0.93433	0.92808	0.97856	0.922175	0.934142	0.856459		0.535888																20	168	0.931206	0.922458	0.940028	0.930856	0.980527	0.922458	0.939512	0.86242		0.550862
19	124.6	0.926596	0.920621	0.932621	0.926438	0.978282	0.920621	0.932371	0.853197		0.528051																19	159.8	0.931206	0.922458	0.940028	0.930856	0.980079	0.922458	0.939476	0.86242		0.550589
18	119	0.926879	0.921045	0.932764	0.92674	0.978063	0.921045	0.932562	0.853764		0.529293																18	154	0.930922	0.922175	0.939744	0.930587	0.979937	0.922175	0.939244	0.861852		0.549181
17	114.4	0.926596	0.921751	0.931481	0.926523	0.978034	0.921751	0.931422	0.853195		0.528077																17	146.2	0.93227	0.92274	0.94188	0.931882	0.980038	0.92274	0.941262	0.864548		0.555647
16	110.1	0.925957	0.920056	0.931909	0.925807	0.977345	0.920056	0.931703	0.85192		0.524612																16	135.7	0.93078	0.921893	0.939744	0.930427	0.979645	0.921893	0.93918	0.861569		0.548286
15	105.4	0.927376	0.92387	0.930912	0.927407	0.977053	0.92387	0.931025	0.854754		0.531346																15	129	0.931277	0.920339	0.942308	0.930777	0.979691	0.920339	0.941515	0.862564		0.550454
14	100.2	0.924823	0.920621	0.92906	0.924794	0.976379	0.920621	0.929067	0.849649		0.519056																14	124.6	0.930142	0.92048	0.939886	0.929729	0.979034	0.92048	0.939232	0.860293		0.544787
13	95.8	0.925248	0.919633	0.930912	0.925117	0.976156	0.919633	0.930718	0.850501		0.52072																13	119.6	0.93	0.921328	0.938746	0.929647	0.978905	0.921328	0.938191	0.860008		0.544142
12	89.4	0.925887	0.919774	0.932051	0.925721	0.976003	0.919774	0.931798	0.851779		0.523528																12	114.9	0.927667	0.916525	0.936895	0.926187	0.978863	0.916525	0.936133	0.853344		0.528755
11	83.3	0.924681	0.92048	0.928917	0.924662	0.97503	0.92048	0.928927	0.849365		0.517696																11	109.3	0.927872	0.919774	0.93604	0.927556	0.978595	0.919774	0.935553	0.855753		0.533955
10	78.8	0.922837	0.918927	0.926781	0.922836	0.974048	0.918927	0.926852	0.845677		0.508842																10	100	0.928511	0.917373	0.939744	0.927967	0.977987	0.917373	0.938907	0.857033		0.536258
9	73	0.920851	0.917938	0.923789	0.920924	0.972499	0.917938	0.923989	0.841704		0.499261																9	91.6	0.927234	0.914972	0.939601	0.926589	0.97719	0.914972	0.938641	0.854482		0.529684
8	67.2	0.920496	0.916667	0.924359	0.920502	0.971146	0.916667	0.924425	0.840996		0.49689																8	82.6	0.926596	0.917514	0.935755	0.926202	0.975751	0.917514	0.935136	0.853201		0.526319
7	61	0.91844	0.915678	0.921225	0.918546	0.968161	0.915678	0.921482	0.836881		0.48652																7	74	0.925823	0.915537	0.934188	0.924389	0.97533	0.915537	0.933526	0.849655		0.518429
6	53.4	0.910993	0.909887	0.912108	0.911265	0.962182	0.909887	0.912723	0.821984		0.452523																6	70	0.925674	0.918644	0.932764	0.925428	0.974908	0.918644	0.932361	0.851354		0.521825
5	45.8	0.902057	0.903672	0.900427	0.902624	0.95524	0.903672	0.901716	0.804107		0.414675																5	61.5	0.923333	0.915113	0.931624	0.923004	0.972822	0.915113	0.931121	0.846675		0.509928
4	39	0.89617	0.900141	0.892165	0.897014	0.951582	0.900141	0.894033	0.79233		0.391708																4	53.7	0.919574	0.912853	0.926353	0.919353	0.971571	0.912853	0.926015	0.839156		0.4927
3	32	0.890638	0.89322	0.888034	0.891356	0.946605	0.89322	0.889598	0.781268		0.370051																3	46	0.918298	0.913277	0.923362	0.918201	0.968985	0.913277	0.923246	0.8366		0.486016
2	25.7	0.880496	0.887571	0.873362	0.881794	0.937841	0.887571	0.876176	0.760975		0.33403																2	34	0.88695	0.884887	0.889031	0.887122	0.949208	0.884887	0.889409	0.773902		0.357869
1	18	0.867305	0.876271	0.858262	0.868996	0.928886	0.876271	0.86193	0.734585		0.292122																1	20	0.865603	0.868785	0.862393	0.866545	0.930841	0.868785	0.8644	0.731194		0.287252
LFDM
#Clusters	#Genes (Mean)	Accuracy (Mean)	Sensitivity (Mean)	Specifity (Mean)	F-measure (Mean)	Area Under Curve (Mean)	Recall (Mean)	Precision (Mean)	Cohen's kappa (Mean)		Rank
20	197	0.929291	0.924294	0.93433	0.929199	0.978968	0.924294	0.934227	0.858586		0.541234
19	187	0.92844	0.921186	0.935755	0.928183	0.978807	0.921186	0.93533	0.856886		0.536821
18	180	0.929291	0.923023	0.935613	0.929123	0.978405	0.923023	0.935394	0.858587		0.540807
17	172	0.928582	0.924294	0.932906	0.928547	0.978193	0.924294	0.932945	0.857166		0.53756
16	171.2	0.928511	0.924435	0.932621	0.928492	0.978194	0.924435	0.932693	0.857024		0.537254
15	160	0.927447	0.922175	0.932764	0.927335	0.977893	0.922175	0.932605	0.854898		0.531897
14	150	0.928652	0.924011	0.933333	0.928587	0.977365	0.924011	0.933274	0.857309		0.537366
13	139.5	0.925248	0.921186	0.929345	0.92523	0.977006	0.921186	0.929371	0.850499		0.521363
12	128.6	0.926809	0.925	0.928632	0.926961	0.975672	0.925	0.92899	0.853617		0.528149
11	117.2	0.92461	0.924435	0.924786	0.924887	0.974957	0.924435	0.925377	0.849218		0.517803
10	107.2	0.924539	0.922316	0.926781	0.92465	0.974171	0.922316	0.927049	0.849079		0.516804
9	97	0.923121	0.919774	0.926496	0.923162	0.972266	0.919774	0.926633	0.846243		0.509249
8	88.2	0.920638	0.920056	0.921225	0.920912	0.969678	0.920056	0.921869	0.841275		0.497206
7	79.4	0.920142	0.920339	0.919943	0.920482	0.968184	0.920339	0.920705	0.840281		0.494344
6	67.2	0.910638	0.913842	0.907407	0.911267	0.961973	0.913842	0.908798	0.821269		0.451494
5	55	0.904184	0.909887	0.898433	0.905087	0.953578	0.909887	0.900419	0.808357		0.422486
4	47	0.898511	0.90791	0.889031	0.899835	0.952688	0.90791	0.891966	0.797002		0.401279
3	39	0.890284	0.896893	0.883618	0.891333	0.95977	0.896893	0.886402	0.780553		0.374554
2	31.2	0.871773	0.84322	0.90057	0.868457	0.936373	0.84322	0.895356	0.743606		0.302231
1	19	0.838723	0.8	0.877778	0.832767	0.889003	0.8	0.868534	0.67755		0.205276
GPM
#Clusters	#Genes (Mean)	Accuracy (Mean)	Sensitivity (Mean)	Specifity (Mean)	F-measure (Mean)	Area Under Curve (Mean)	Recall (Mean)	Precision (Mean)	Cohen's kappa (Mean)		Rank
20	201	0.931844	0.927684	0.93604	0.931819	0.980245	0.927684	0.936085	0.863691		0.554341
19	186	0.926525	0.922599	0.930484	0.926521	0.979618	0.922599	0.930552	0.853052		0.528714
18	176	0.927305	0.919915	0.934758	0.927048	0.979177	0.919915	0.934393	0.854617		0.531719
17	170	0.927589	0.921186	0.934046	0.927415	0.978729	0.921186	0.933858	0.855183		0.53296
16	158	0.925816	0.919492	0.932194	0.925623	0.978642	0.919492	0.931899	0.851637		0.524575
15	152	0.928298	0.923446	0.933191	0.928225	0.978537	0.923446	0.933172	0.856599		0.536354
14	146.3	0.92695	0.921328	0.932621	0.926812	0.978264	0.921328	0.932443	0.853906		0.529749
13	138.8	0.925461	0.920621	0.930342	0.925381	0.978367	0.920621	0.930234	0.850926		0.522961
12	132	0.925603	0.921328	0.929915	0.925587	0.977736	0.921328	0.929954	0.851209		0.523398
11	124.2	0.924397	0.918644	0.930199	0.924249	0.977564	0.918644	0.92998	0.8488		0.517538
10	115.4	0.924326	0.920198	0.92849	0.924312	0.977527	0.920198	0.928564	0.848655		0.517435
9	105.5	0.92461	0.920198	0.92906	0.924574	0.976909	0.920198	0.929084	0.849223		0.518367
8	95.8	0.924326	0.920339	0.928348	0.924317	0.976933	0.920339	0.928398	0.848655		0.517109
7	86.2	0.922199	0.916808	0.927635	0.922064	0.975944	0.916808	0.927477	0.844402		0.506753
6	74.9	0.923404	0.920198	0.926638	0.923455	0.975198	0.920198	0.926851	0.84681		0.512117
5	65.4	0.922908	0.919209	0.926638	0.922927	0.974536	0.919209	0.926738	0.845818		0.509444
4	56.6	0.916738	0.913701	0.919801	0.916807	0.972722	0.913701	0.919998	0.833477		0.481386
3	44	0.901418	0.899718	0.903134	0.901563	0.960401	0.899718	0.903557	0.802838		0.413926
2	28	0.854539	0.819915	0.889459	0.84982	0.932544	0.819915	0.882191	0.709161		0.253337
1	19.9	0.843759	0.812006	0.875783	0.839167	0.903352	0.812006	0.868353	0.687599		0.220531

## Sheet: TW + TD
GSDMM
#Clusters	#Genes (Mean)	Accuracy (Mean)	Sensitivity (Mean)	Specifity (Mean)	F-measure (Mean)	Area Under Curve (Mean)	Recall (Mean)	Precision (Mean)	Cohen's kappa (Mean)		Rank
20	148	0.943546	0.946328	0.940741	0.943924	0.984057	0.946328	0.941571	0.887088		0.616727
19	144	0.943972	0.947316	0.940598	0.944382	0.984139	0.947316	0.941517	0.887938		0.619111
18	138	0.943404	0.946045	0.940741	0.943774	0.983842	0.946045	0.941549	0.886804		0.615823
17	134.6	0.943688	0.94548	0.94188	0.944011	0.983919	0.94548	0.942573	0.887372		0.617286
16	129.6	0.944184	0.947175	0.941168	0.944557	0.984123	0.947175	0.941988	0.888364		0.620153
15	123	0.943121	0.946751	0.939459	0.943545	0.983923	0.946751	0.940407	0.886236		0.614477
14	115.9	0.943404	0.947034	0.939744	0.943828	0.984266	0.947034	0.940698	0.886803		0.616199
13	108	0.943191	0.947599	0.938746	0.943662	0.984077	0.947599	0.939792	0.886377		0.615025
12	100	0.94305	0.945621	0.940456	0.943418	0.984652	0.945621	0.941271	0.886095		0.614454
11	95.5	0.943121	0.945763	0.940456	0.94349	0.984	0.945763	0.941261	0.886237		0.614415
10	90.4	0.943901	0.946328	0.941453	0.944254	0.984258	0.946328	0.942218	0.887797		0.618687
9	86	0.94234	0.945198	0.939459	0.942725	0.983706	0.945198	0.940292	0.884676		0.610138
8	80	0.943759	0.946328	0.941168	0.94412	0.983863	0.946328	0.941963	0.887514		0.617706
7	69.5	0.943121	0.946328	0.939886	0.943528	0.983738	0.946328	0.940785	0.886236		0.614327
6	63.6	0.942908	0.94435	0.941453	0.943215	0.983813	0.94435	0.942113	0.885812		0.61306
5	58.7	0.943688	0.945339	0.942023	0.943994	0.984047	0.945339	0.94268	0.887373		0.617334
4	55	0.943404	0.945198	0.941595	0.943729	0.984022	0.945198	0.942287	0.886805		0.615845
3	51	0.943191	0.944633	0.941738	0.943499	0.983776	0.944633	0.942405	0.88638		0.614541
2	40	0.941135	0.942373	0.939886	0.94144	0.982281	0.942373	0.940547	0.882266		0.60281
1	20	0.926738	0.926271	0.927208	0.926978	0.967673	0.926271	0.927745	0.853474		0.523633
BTM
#Clusters	#Genes (Mean)	Accuracy (Mean)	Sensitivity (Mean)	Specifity (Mean)	F-measure (Mean)	Area Under Curve (Mean)	Recall (Mean)	Precision (Mean)	Cohen's kappa (Mean)		Rank
20	158	0.941844	0.947599	0.93604	0.942399	0.982581	0.947599	0.937286	0.88368		0.607146
19	156	0.94234	0.946469	0.938177	0.942797	0.982432	0.946469	0.93917	0.884675		0.609473
18	151.5	0.942979	0.948588	0.937322	0.943516	0.98328	0.948588	0.938521	0.88595		0.613515
17	147.5	0.941844	0.946469	0.937179	0.942331	0.982845	0.946469	0.938253	0.883682		0.607181
16	142.5	0.942908	0.94774	0.938034	0.9434	0.982914	0.94774	0.939128	0.885809		0.612834
15	135.5	0.942766	0.947316	0.938177	0.943246	0.983013	0.947316	0.939232	0.885526		0.612121
14	128.9	0.942979	0.947881	0.938034	0.943479	0.98311	0.947881	0.939154	0.885951		0.613351
13	122.2	0.942695	0.94661	0.938746	0.943131	0.983067	0.94661	0.939707	0.885385		0.611705
12	114.7	0.94227	0.94661	0.937892	0.942743	0.983389	0.94661	0.938933	0.884533		0.60973
11	107.7	0.942128	0.946328	0.937892	0.942581	0.983185	0.946328	0.938893	0.88425		0.608822
10	101.2	0.942837	0.947599	0.938034	0.943323	0.983206	0.947599	0.939113	0.885667		0.612629
9	96.4	0.941206	0.945198	0.937179	0.941666	0.983098	0.945198	0.938183	0.882406		0.603952
8	89.5	0.942128	0.946186	0.938034	0.942573	0.982996	0.946186	0.939021	0.88425		0.608694
7	82	0.942128	0.945056	0.939174	0.942509	0.98272	0.945056	0.940015	0.884251		0.608411
6	75.8	0.942128	0.945763	0.938462	0.942553	0.982755	0.945763	0.939395	0.88425		0.608507
5	67.4	0.941773	0.94548	0.938034	0.942208	0.982753	0.94548	0.938986	0.883541		0.606662
4	58.9	0.941915	0.94548	0.938319	0.942342	0.98283	0.94548	0.93926	0.883825		0.607443
3	50.3	0.941206	0.944492	0.937892	0.941621	0.982572	0.944492	0.938804	0.882406		0.603556
2	40	0.936667	0.942655	0.930627	0.937278	0.980919	0.942655	0.931977	0.873325		0.579628
1	20	0.932057	0.935593	0.92849	0.932553	0.978043	0.935593	0.929558	0.864107		0.55497
WNTM
#Clusters	#Genes (Mean)	Accuracy (Mean)	Sensitivity (Mean)	Specifity (Mean)	F-measure (Mean)	Area Under Curve (Mean)	Recall (Mean)	Precision (Mean)	Cohen's kappa (Mean)
20	235	0.931986	0.937712	0.926211	0.932644	0.978963	0.937712	0.927686	0.863963		0.555439
19	227	0.932128	0.938559	0.925641	0.932839	0.979334	0.938559	0.927254	0.864246		0.556435
18	218	0.932199	0.939266	0.925071	0.932934	0.978754	0.939266	0.926731	0.864387		0.556476
17	209.6	0.933759	0.939831	0.927635	0.934427	0.978845	0.939831	0.9292	0.867509		0.564097
16	199.8	0.932908	0.938277	0.927493	0.933531	0.978669	0.938277	0.928908	0.865807		0.559719
15	188.3	0.932979	0.939548	0.926353	0.93368	0.978632	0.939548	0.927963	0.865948		0.560178
14	177.3	0.931631	0.937994	0.925214	0.932337	0.978588	0.937994	0.926782	0.863253		0.553573
13	165.6	0.932624	0.939124	0.926068	0.933316	0.978135	0.939124	0.927635	0.865239		0.558131
12	153.2	0.932979	0.940678	0.925214	0.933767	0.978511	0.940678	0.927001	0.865946		0.560236
11	143.8	0.933759	0.941243	0.926211	0.934509	0.978874	0.941243	0.927906	0.867507		0.564203
10	132.9	0.93227	0.938559	0.925926	0.932964	0.97831	0.938559	0.927501	0.864529		0.556515
9	121.3	0.932482	0.937994	0.926923	0.933134	0.978717	0.937994	0.928391	0.864956		0.557713
8	111	0.931915	0.938418	0.925356	0.932628	0.978443	0.938418	0.92694	0.86382		0.554877
7	101.8	0.931702	0.937147	0.926211	0.932348	0.978119	0.937147	0.927641	0.863396		0.553556
6	91	0.931773	0.937147	0.926353	0.932408	0.977858	0.937147	0.927782	0.863538		0.553747
5	80	0.928652	0.93291	0.924359	0.929233	0.976655	0.93291	0.925674	0.857298		0.538057
4	67	0.927518	0.931073	0.923932	0.928065	0.976112	0.931073	0.925158	0.855029		0.532359
3	55	0.927589	0.932345	0.922792	0.928205	0.975701	0.932345	0.92424	0.855169		0.532611
2	40	0.922057	0.92839	0.91567	0.922842	0.973067	0.92839	0.917417	0.844103		0.506045
1	20	0.916454	0.925847	0.90698	0.917548	0.969953	0.925847	0.909505	0.832892		0.480353
PTM
#Clusters	#Genes (Mean)	Accuracy (Mean)	Sensitivity (Mean)	Specifity (Mean)	F-measure (Mean)	Area Under Curve (Mean)	Recall (Mean)	Precision (Mean)	Cohen's kappa (Mean)		Rank
20	250	0.935177	0.939407	0.930912	0.935707	0.980673	0.939407	0.932109	0.870348		0.571917
19	237	0.934326	0.939124	0.929487	0.934904	0.980657	0.939124	0.930778	0.868645		0.567755
18	228.8	0.933901	0.938277	0.929487	0.934449	0.980944	0.938277	0.930716	0.867794		0.56577
17	217.2	0.934043	0.938418	0.92963	0.934587	0.981069	0.938418	0.930855	0.868078		0.566539
16	206	0.934539	0.937147	0.931909	0.934966	0.98104	0.937147	0.932899	0.869073		0.5688
15	195	0.934043	0.936017	0.932051	0.934428	0.980987	0.936017	0.932908	0.868081		0.566216
14	184.3	0.934468	0.938559	0.930342	0.934988	0.980827	0.938559	0.931489	0.86893		0.568448
13	174	0.934681	0.939548	0.929772	0.935252	0.980737	0.939548	0.931041	0.869354		0.569541
12	163.2	0.934894	0.938559	0.931197	0.935369	0.980742	0.938559	0.932275	0.869781		0.570452
11	151.2	0.934468	0.937712	0.931197	0.934938	0.981161	0.937712	0.932227	0.86893		0.568558
10	139.6	0.935106	0.937571	0.932621	0.935508	0.980829	0.937571	0.933513	0.870208		0.571424
9	130.2	0.934113	0.937994	0.930199	0.934636	0.980834	0.937994	0.931369	0.86822		0.566716
8	120	0.934468	0.937712	0.931197	0.934942	0.980534	0.937712	0.93227	0.86893		0.568223
7	106	0.934397	0.936723	0.932051	0.934795	0.981078	0.936723	0.932947	0.86879		0.568048
6	97	0.935035	0.937006	0.933048	0.935408	0.980593	0.937006	0.933905	0.870067		0.570902
5	83.2	0.934255	0.937288	0.931197	0.934707	0.980411	0.937288	0.932201	0.868505		0.567047
4	69.1	0.934255	0.936299	0.932194	0.934647	0.979816	0.936299	0.933048	0.868506		0.566592
3	56	0.931844	0.936299	0.92735	0.932418	0.978805	0.936299	0.928628	0.863681		0.554521
2	40	0.92922	0.932486	0.925926	0.929736	0.978215	0.932486	0.927069	0.858433		0.541492
1	20	0.921206	0.925282	0.917094	0.921793	0.970362	0.925282	0.918436	0.842404		0.500559
GPU_DMM
#Clusters	#Genes (Mean)	Accuracy (Mean)	Sensitivity (Mean)	Specifity (Mean)	F-measure (Mean)	Area Under Curve (Mean)	Recall (Mean)	Precision (Mean)	Cohen's kappa (Mean)
20	144.4	0.946449	0.95779	0.935043	0.947202	0.98641	0.95779	0.936946	0.89289		0.634574
19	139	0.946023	0.955949	0.93604	0.946702	0.986455	0.955949	0.93772	0.892038		0.63214
18	134	0.945597	0.955949	0.935185	0.946315	0.985726	0.955949	0.936971	0.891186		0.629447
17	130.3	0.945526	0.956657	0.93433	0.946284	0.986004	0.956657	0.936224	0.891043		0.629311
16	125.3	0.945312	0.956374	0.934188	0.946065	0.986191	0.956374	0.936075	0.890617		0.628274
15	120	0.945597	0.956516	0.934615	0.946332	0.986074	0.956516	0.936467	0.891186		0.629704
14	115.2	0.944886	0.955949	0.933761	0.945656	0.985887	0.955949	0.93571	0.889765		0.625837
13	109	0.946307	0.956374	0.936182	0.947003	0.985671	0.956374	0.93792	0.892606		0.633223
12	103.2	0.944389	0.955099	0.933618	0.945136	0.985528	0.955099	0.935465	0.888771		0.62287
11	98.5	0.944176	0.954391	0.933903	0.944904	0.98514	0.954391	0.935735	0.888345		0.62148
10	93	0.943821	0.954108	0.933476	0.944559	0.985133	0.954108	0.935278	0.887634		0.619564
9	87.4	0.944815	0.955099	0.934473	0.945535	0.985169	0.955099	0.936248	0.889623		0.62488
8	82.2	0.944673	0.954391	0.9349	0.945369	0.985493	0.954391	0.936612	0.889339		0.624283
7	74.8	0.942898	0.951841	0.933903	0.94358	0.984401	0.951841	0.935546	0.885788		0.614103
6	66.2	0.941122	0.95085	0.931339	0.94185	0.98375	0.95085	0.933086	0.882237		0.604437
5	58.9	0.940128	0.951133	0.92906	0.940946	0.983615	0.951133	0.931062	0.880247		0.599358
4	52.4	0.939631	0.948584	0.930627	0.940335	0.983025	0.948584	0.932344	0.879254		0.596241
3	45	0.939986	0.95	0.929915	0.940752	0.983133	0.95	0.93179	0.879964		0.598248
2	38	0.937784	0.947592	0.92792	0.938562	0.982507	0.947592	0.929802	0.87556		0.586586
1	20	0.921165	0.928187	0.914103	0.921927	0.96161	0.928187	0.915828	0.842322		0.496125
LFDM
#Clusters	#Genes (Mean)	Accuracy (Mean)	Sensitivity (Mean)	Specifity (Mean)	F-measure (Mean)	Area Under Curve (Mean)	Recall (Mean)	Precision (Mean)	Cohen's kappa (Mean)
20	207	0.93544	0.934419	0.936467	0.935537	0.981028	0.934419	0.936732	0.870881		0.572675
19	200	0.935014	0.933569	0.936467	0.935093	0.980652	0.933569	0.936692	0.870029		0.570301
18	192.8	0.93473	0.932578	0.936895	0.934742	0.980595	0.932578	0.937021	0.869461		0.568759
17	192	0.934801	0.932295	0.937322	0.934791	0.98061	0.932295	0.937411	0.869603		0.569084
16	179.5	0.934943	0.932295	0.937607	0.934928	0.980662	0.932295	0.937659	0.869888		0.569794
15	170	0.934233	0.931445	0.937037	0.934215	0.98038	0.931445	0.937056	0.868467		0.566091
14	157.4	0.934162	0.931728	0.93661	0.934154	0.980556	0.931728	0.936747	0.868325		0.56592
13	149.3	0.935937	0.932578	0.939316	0.935878	0.980079	0.932578	0.939262	0.871877		0.574316
12	137.8	0.934446	0.931445	0.937464	0.934408	0.980575	0.931445	0.937461	0.868894		0.567232
11	126.2	0.933878	0.929887	0.937892	0.933775	0.980176	0.929887	0.937755	0.867758		0.564076
10	116.7	0.933665	0.930312	0.937037	0.933605	0.98028	0.930312	0.936991	0.867331		0.563169
9	105.7	0.934872	0.930312	0.939459	0.934724	0.980236	0.930312	0.939284	0.869747		0.568972
8	99.4	0.932741	0.928612	0.936895	0.932628	0.979366	0.928612	0.936725	0.865485		0.558015
7	85.5	0.932457	0.930878	0.934046	0.932516	0.978424	0.930878	0.934243	0.864915		0.556416
6	75	0.932173	0.928895	0.93547	0.932117	0.978054	0.928895	0.935487	0.864348		0.554651
5	65.4	0.932173	0.930028	0.93433	0.932201	0.978354	0.930028	0.934447	0.864347		0.55493
4	59	0.932102	0.930595	0.933618	0.932164	0.978021	0.930595	0.933798	0.864205		0.554453
3	52.6	0.931676	0.930737	0.932621	0.931776	0.977064	0.930737	0.932878	0.863352		0.551914
2	39	0.92706	0.921246	0.932906	0.926804	0.972523	0.921246	0.932494	0.854123		0.526928
1	20	0.899645	0.88711	0.912251	0.898617	0.952497	0.88711	0.910548	0.799303		0.40234
GPM
#Clusters	#Genes (Mean)	Accuracy (Mean)	Sensitivity (Mean)	Specifity (Mean)	F-measure (Mean)	Area Under Curve (Mean)	Recall (Mean)	Precision (Mean)	Cohen's kappa (Mean)
20	206	0.93617	0.940395	0.931909	0.936676	0.98168	0.940395	0.933134	0.872334		0.577478
19	196	0.934397	0.939548	0.929202	0.934974	0.981262	0.939548	0.930567	0.868787		0.568493
18	190	0.935603	0.940819	0.930342	0.936177	0.981133	0.940819	0.931684	0.871198		0.574404
17	179.1	0.936879	0.941102	0.932621	0.93738	0.981526	0.941102	0.933842	0.873752		0.580953
16	174.6	0.935957	0.939124	0.932764	0.936394	0.981429	0.939124	0.933821	0.87191		0.576138
15	168.5	0.936454	0.940254	0.932621	0.936926	0.981509	0.940254	0.933741	0.872902		0.578726
14	159.5	0.935035	0.937853	0.932194	0.935456	0.981726	0.937853	0.93322	0.870066		0.571681
13	151	0.934043	0.937147	0.930912	0.934499	0.981022	0.937147	0.931995	0.86808		0.566397
12	144.2	0.935319	0.939689	0.930912	0.935844	0.98141	0.939689	0.932185	0.870632		0.573096
11	135.6	0.935816	0.939407	0.932194	0.936281	0.981517	0.939407	0.933326	0.871625		0.575534
10	125.2	0.935674	0.939407	0.931909	0.936148	0.981195	0.939407	0.933027	0.871342		0.574629
9	114.8	0.93539	0.938842	0.931909	0.935855	0.981038	0.938842	0.932995	0.870774		0.5731
8	105.7	0.934539	0.938559	0.930484	0.935041	0.980997	0.938559	0.931713	0.869072		0.568939
7	95.2	0.933617	0.936582	0.930627	0.934054	0.980497	0.936582	0.931687	0.867229		0.563972
6	85.3	0.935035	0.939266	0.930769	0.935551	0.980759	0.939266	0.932004	0.870064		0.571276
5	76.2	0.933759	0.936582	0.930912	0.934203	0.979806	0.936582	0.932	0.867512		0.564297
4	64.6	0.930496	0.934463	0.926496	0.93102	0.977744	0.934463	0.927756	0.860986		0.54739
3	48.9	0.928794	0.93178	0.925783	0.929256	0.976473	0.93178	0.926913	0.857583		0.538476
2	39.9	0.926809	0.929661	0.923932	0.927277	0.975937	0.929661	0.925125	0.853611		0.528897
1	20	0.900426	0.896469	0.904416	0.900402	0.952452	0.896469	0.904491	0.800855		0.40656
GPU_PDMM
#Clusters	#Genes (Mean)	Accuracy (Mean)	Sensitivity (Mean)	Specifity (Mean)	F-measure (Mean)	Area Under Curve (Mean)	Recall (Mean)	Precision (Mean)	Cohen's kappa (Mean)
20	151	0.926491	0.935269	0.917664	0.927299	0.977695	0.935269	0.919569	0.852975		0.528861
19	151	0.926491	0.935269	0.917664	0.927299	0.977695	0.935269	0.919569	0.852975		0.528861
18	151	0.926491	0.935269	0.917664	0.927299	0.977695	0.935269	0.919569	0.852975		0.528861
17	150.6	0.926207	0.935269	0.917094	0.927035	0.977484	0.935269	0.919045	0.852406		0.527454
16	150.6	0.926207	0.935269	0.917094	0.927035	0.977484	0.935269	0.919045	0.852406		0.527454
15	138	0.926918	0.936261	0.917521	0.927767	0.977	0.936261	0.919542	0.853827		0.530549
14	131.8	0.926136	0.934844	0.917379	0.926947	0.976899	0.934844	0.919298	0.852265		0.52679
13	124	0.924929	0.934419	0.915385	0.925802	0.97767	0.934419	0.917426	0.849849		0.521698
12	110	0.926918	0.936402	0.917379	0.927782	0.977839	0.936402	0.9194	0.853826		0.53101
11	102	0.925852	0.935552	0.916097	0.926732	0.977272	0.935552	0.918185	0.851696		0.52578
10	94	0.927344	0.936402	0.918234	0.928164	0.978116	0.936402	0.9202	0.854679		0.533113
9	88	0.927486	0.936261	0.918661	0.92829	0.977631	0.936261	0.920538	0.854963		0.533463
8	82	0.927273	0.935977	0.918519	0.928062	0.977439	0.935977	0.920383	0.854538		0.532343
7	76.1	0.927557	0.934561	0.920513	0.928226	0.977476	0.934561	0.922114	0.855107		0.53352
6	70.9	0.925923	0.933711	0.918091	0.926647	0.977471	0.933711	0.919812	0.851839		0.52597
5	64	0.926776	0.933853	0.919658	0.927447	0.977043	0.933853	0.921239	0.853545		0.529613
4	53	0.927912	0.935977	0.919801	0.928653	0.977389	0.935977	0.921547	0.855816		0.535242
3	47.9	0.923153	0.93102	0.915242	0.923932	0.974644	0.93102	0.917037	0.846299		0.511829
2	40	0.92017	0.926487	0.913818	0.92085	0.973389	0.926487	0.915395	0.840334		0.497671
1	20	0.908949	0.914023	0.903846	0.909606	0.966597	0.914023	0.905338	0.817892		0.446841

## Sheet: Summary(1)
Mode --> TW
TM	Mode	#words	Accuracy	Sensitivity	Specifity	F-measure	Area Under Curve	Recall	Precision	Cohen's kappa
BTM	TW	131.7	0.925319	0.920198	0.930484	0.925207	0.976928	0.920198	0.930368	0.850643
GSDMM	TW	114.6	0.925674	0.921893	0.929487	0.925653	0.977125	0.921893	0.929647	0.85135
WNTM	TW	188.4	0.931135	0.919915	0.94245	0.930625	0.978649	0.919915	0.941648	0.862281	Winner
PTM	TW	208.2	0.929858	0.922599	0.937179	0.929626	0.979979	0.922599	0.93685	0.859723
GPU_PDMM	TW	112	0.926525	0.91822	0.9349	0.926207	0.97587	0.91822	0.934376	0.853058
GPU-DMM	TW	131	0.928227	0.922175	0.93433	0.92808	0.97856	0.922175	0.934142	0.856459
LFDMM	TW	180	0.929291	0.923023	0.935613	0.929123	0.978405	0.923023	0.935394	0.858587
GPM	TW	201	0.931844	0.927684	0.93604	0.931819	0.980245	0.927684	0.936085	0.863691
SATM	TW

## Sheet: Summary(2)
Mode --> TD
TM	Mode	#words	Accuracy	Sensitivity	Specifity	F-measure	Area Under Curve	Recall	Precision	Cohen's kappa
GSDMM	TD	20	0.926738	0.926271	0.927208	0.926978	0.967673	0.926271	0.927745	0.853474
BTM	TD	20	0.932057	0.935593	0.92849	0.932553	0.978043	0.935593	0.929558	0.864107	Winner
WNTM	TD	20	0.916454	0.925847	0.90698	0.917548	0.969953	0.925847	0.909505	0.832892
PTM	TD	20	0.921206	0.925282	0.917094	0.921793	0.970362	0.925282	0.918436	0.842404
GPU_DMM	TD	20	0.921165	0.928187	0.914103	0.921927	0.96161	0.928187	0.915828	0.842322
LFDMM	TD	20	0.899645	0.88711	0.912251	0.898617	0.952497	0.88711	0.910548	0.799303
GPU-PDMM	TD	20	0.908949	0.914023	0.903846	0.909606	0.966597	0.914023	0.905338	0.817892
GPM	TD	20	0.900426	0.896469	0.904416	0.900402	0.952452	0.896469	0.904491	0.800855
SATM	TD	20
Mode --> TW+TD
TM	Mode	#words	Accuracy	Sensitivity	Specifity	F-measure	Area Under Curve	Recall	Precision	Cohen's kappa
GSDMM	TW+TD	90.4	0.943901	0.946328	0.941453	0.944254	0.984258	0.946328	0.942218	0.887797
BTM	TW+TD	101.2	0.942837	0.947599	0.938034	0.943323	0.983206	0.947599	0.939113	0.885667
WNTM	TW+TD	143.8	0.933759	0.941243	0.926211	0.934509	0.978874	0.941243	0.927906	0.867507
PTM	TW+TD	139.6	0.935106	0.937571	0.932621	0.935508	0.980829	0.937571	0.933513	0.870208
GPU_DMM	TW+TD	144.4	0.946449	0.95779	0.935043	0.947202	0.98641	0.95779	0.936946	0.89289
LFDMM	TW+TD	149.3	0.935937	0.932578	0.939316	0.935878	0.980079	0.932578	0.939262	0.871877
GPU-PDMM	TW+TD	53	0.927912	0.935977	0.919801	0.928653	0.977389	0.935977	0.921547	0.855816
GPM	TW+TD	179.1	0.936879	0.941102	0.932621	0.93738	0.981526	0.941102	0.933842	0.873752
SATM	TW+TD

## Sheet: Full Sum
TM	Mode	#words	Accuracy	Sensitivity	Specifity	F-measure	Area Under Curve	Recall	Precision	Cohen's kappa		TP-TD	TP-TW	TP-ALL
GSDMM	TW+TD	90.4	0.943901	0.946328	0.941453	0.944254	0.984258	0.946328	0.942218	0.887797		0.0172753	0.0186011	0.00670569
	BW+TD	1184	0.937872	0.929379	0.946439	0.937548	0.983421	0.929379	0.945947	0.875752
	TW	114.6	0.925674	0.921893	0.929487	0.925653	0.977125	0.921893	0.929647	0.85135
	TD	20	0.926738	0.926271	0.927208	0.926978	0.967673	0.926271	0.927745	0.853474
BTM	TW+TD	101.2	0.942837	0.947599	0.938034	0.943323	0.983206	0.947599	0.939113	0.885667		0.0107704	0.0181164	0.00329953
	BW+TD	1184	0.939645	0.942232	0.937037	0.940024	0.981	0.942232	0.937894	0.879286
	TW	131.7	0.925319	0.920198	0.930484	0.925207	0.976928	0.920198	0.930368	0.850643
	TD	20	0.932057	0.935593	0.92849	0.932553	0.978043	0.935593	0.929558	0.864107
PTM	TW+TD	139.6	0.935106	0.937571	0.932621	0.935508	0.980829	0.937571	0.933513	0.870208		0.0137148	0.00588123	-0.00555745
	BW+TD	1184	0.940496	0.946186	0.934758	0.941065	0.983084	0.946186	0.936045	0.880985
	TW	208.2	0.929858	0.922599	0.937179	0.929626	0.979979	0.922599	0.93685	0.859723
	TD	20	0.921206	0.925282	0.917094	0.921793	0.970362	0.925282	0.918436	0.842404
SATM	TW+TD											0	0	0
	BW+TD	1184
	TW
	TD
WNTM	TW+TD	143.8	0.933759	0.941243	0.926211	0.934509	0.978874	0.941243	0.927906	0.867507		0.0169607	0.00388415	-0.00297195
	BW+TD	1184	0.936809	0.943644	0.929915	0.937481	0.9824	0.943644	0.931475	0.873608
	TW	188.4	0.931135	0.919915	0.94245	0.930625	0.978649	0.919915	0.941648	0.862281
	TD	20	0.916454	0.925847	0.90698	0.917548	0.969953	0.925847	0.909505	0.832892
GPM	TW+TD	179.1	0.936879	0.941102	0.932621	0.93738	0.981526	0.941102	0.933842	0.873752		0.0369778	0.00556128	-0.000813143
	BW+TD	1184	0.937943	0.938277	0.937607	0.938193	0.982734	0.938277	0.938181	0.875884
	TW	201	0.931844	0.927684	0.93604	0.931819	0.980245	0.927684	0.936085	0.863691
	TD	20	0.900426	0.896469	0.904416	0.900402	0.952452	0.896469	0.904491	0.800855
GPU_DMM	TW+TD	144.4	0.946449	0.95779	0.935043	0.947202	0.98641	0.95779	0.936946	0.89289		0.0252751	0.0191219	0.0103358
	BW+TD	1184	0.937029	0.931161	0.942939	0.936866	0.981316	0.931161	0.942671	0.874062
	TW	131	0.928227	0.922175	0.93433	0.92808	0.97856	0.922175	0.934142	0.856459
	TD	20	0.921165	0.928187	0.914103	0.921927	0.96161	0.928187	0.915828	0.842322
GPU_PDMM	TW+TD	53	0.927912	0.935977	0.919801	0.928653	0.977389	0.935977	0.921547	0.855816		0.0190464	0.00244603	-0.00714715
	BW+TD	1184	0.936	0.9324	0.9391	0.9358	0.9813	0.9324	0.9392	0.8715
	TW	112	0.926525	0.91822	0.9349	0.926207	0.97587	0.91822	0.934376	0.853058
	TD	20	0.908949	0.914023	0.903846	0.909606	0.966597	0.914023	0.905338	0.817892
LFDM	TW+TD	149.3	0.935937	0.932578	0.939316	0.935878	0.980079	0.932578	0.939262	0.871877		0.0372602	0.00675481	-0.00270029
	BW+TD	1184	0.938735	0.932861	0.94465	0.938578	0.983425	0.932861	0.944405	0.877474
	TW	180	0.929291	0.923023	0.935613	0.929123	0.978405	0.923023	0.935394	0.858587
	TD	20	0.899645	0.88711	0.912251	0.898617	0.952497	0.88711	0.910548	0.799303

## Sheet: Inbalanced DS
						TextNetTopics Pro						BOW + TD					TextNetTopics					BOW
							Accuracy	F1	Precision	Recall		Accuracy	F1	Precision	Recall		Accuracy	F1	Precision	Recall		Accuracy	F1	Precision	Recall
						T1	0.882007	0.899	0.8945	0.903		0.598572	0.6554	0.6537	0.657		0.549864	0.6766	0.5806	0.8106		0.555952	0.6881	0.5812	0.8432		-0.0115	0.2224
						T2	0.942276	0.7884	0.7399	0.8436		0.873504	0.582	0.5028	0.6909		0.595563	0.3	0.1925	0.68		0.511692	0.2768	0.1706	0.7331		0.0232	0.4884
						T2	0.964666	0.5771	0.4813	0.7205		0.948485	0.3933	0.3246	0.4991		0.770292	0.091	0.0524	0.3434		0.73346	0.0878	0.0496	0.3832		0.0032	0.4861
						V1	0.863258	0.8707	0.856	0.8859		0.816754	0.8294	0.8034	0.8572		0.702495	0.7705	0.6431	0.9609		0.589929	0.7003	0.5646	0.9221		0.0702	0.1002
						V2	0.944262	0.7506	0.6949	0.8159		0.926434	0.7171	0.5929	0.9072		0.704212	0.3984	0.2519	0.9529		0.634607	0.3485	0.2134	0.9508		0.0499	0.3522
						V3	0.959946	0.5463	0.4416	0.716		0.944098	0.3209	0.2715	0.3921		0.773989	0.0611	0.0355	0.2182		0.718845	0.0613	0.0345	0.2724		-0.0002	0.4852
						V4	0.916643	0.9219	0.867	0.9843		0.896357	0.9053	0.8333	0.991		0.795571	0.8222	0.7274	0.9454		0.778429	0.8172	0.6955	0.9904		0.005	0.0997
																				100 PTM
							BOW	TextNetTopics	TextNetTopics Pro
						T1	0.6881	0.6766	0.899
						T2	0.2768	0.3	0.7884
						T3	0.0878	0.091	0.5771
						V1	0.7003	0.7705	0.8707
						V2	0.3485	0.3984	0.7506
						V3	0.0613	0.0611	0.5463
						V4	0.8172	0.8222	0.9219
