# Supplementary material for: TextNetTopics Pro, a topic model-based text classification for short text by integration of semantic and document-topic distribution information
Source: Front Genet. 2023 Oct 5;14:1243874. doi: 10.3389/fgene.2023.1243874 (PMC10585361; doi:10.3389/fgene.2023.1243874)
Supplement: Supplementary file 4 [file DataSheet1.xlsx]

## Sheet: titles_CAMDA
Preprocessed Titles (CAMDA Dataset)	# of words
ibuprofen	1
coin	1
aneurysmectomi	1
etodolac	1
breast-feed	1
vancomycin	1
isofluran	1
sotalol	1
metformin	1
riluzol	1
cidofovir	1
troglitazon	1
telmisartan	1
ibandron	1
meta-analysi	1
rosiglitazon	1
pioglitazon	1
quinupristindalfopristin	1
levetiracetam	1
cystinosi	1
meloxicam	1
fluvastatin	1
clofarabin	1
nitazoxanid	1
tipranavir	1
telithromycin	1
sunitinib	1
echinocandin	1
daclizumab	1
raltegravir	1
ethionamid	1
aliskiren	1
febuxostat	1
anagrelid	1
dronedaron	1
pazopanib	1
letrozol	1
bosentan	1
ciliopathi	1
buspiron	1
carfilzomib	1
pomalidomid	1
cobimetinib	1
octamethylcyclotetrasiloxan	1
suicid	1
tricycl antidepress	2
quinidin hepat	2
alpha-fetoprotein assai	2
clofibr liver	2
occup medicin	2
gonadotropin-releas hormon	2
hormon receptor	2
copyright law	2
trimethoprim-sulfamethoxazol unit	2
hodgkin diseas	2
oxacillin hepatotox	2
oxacillin hepat	2
loxapin fatal	2
intox wheel	2
sulindac jaundic	2
phenytoin hypersensit	2
human cathepsin	2
fenoprofen-induc hepatotox	2
analges hepatotox	2
isoniazid-rel hepatotox	2
salicyl hepat	2
amodiaquin agranulocytosi	2
disulfiram hepatotox	2
isoniazid-associ hepat	2
atrioventricular block	2
autoimmun neutropenia	2
aspirin hepat	2
letter isoniazid	2
cimetidin hepat	2
flucloxacillin jaundic	2
misus ecstasi	2
treatment tyrosinaemia	2
ginkgo biloba	2
kava overview	2
labetalol hepatotox	2
lovastatin-induc hepat	2
asthma children	2
labetalol-induc hepat	2
diclofenac hepat	2
ceftriaxone-induc cholelithiasi	2
cocain liver	2
fluconazole-induc jaundic	2
augmentin-induc jaundic	2
effect ranitidin	2
methotrex side-effect	2
pyrrolizidin poison	2
diclofenac-associ hepatotox	2
norfloxacin-induc hepatotox	2
piroxicam hepatotox	2
polymyalgia minoxidil	2
captopril liver	2
erythropoietin anemia	2
buprenorphin hepatotox	2
effect clozapin	2
ranitidin hepatotox	2
terfenadin hepat	2
alprazolam-rel hepat	2
iron poison	2
naltrexon hepatotox	2
zidovudine-induc hepatotox	2
allopurinol hepatotox	2
diflunis hypersensit	2
indomethacin-associ cholestasi	2
pharmacologi nisoldipin	2
carbamazepin toxic	2
cocaine-induc hepatotox	2
ceftriaxone-associ cholecyst	2
busulfan-induc hepat	2
nifedipin hepat	2
zidovudine-induc hepatotox	2
piroxicam pancreat	2
amodiaquin hepat	2
ketoconazol hepatotox	2
cimetidin hepat	2
hypocalciuria preeclampsia	2
methotrex liver	2
leav alone--two	2
valproat hepatotox	2
enfluran hepatotox	2
pregnanc resid	2
effect carbamazepin	2
hepatotox amiodaron	2
amiodaron liver	2
cyclophosphamide-associ hepatotox	2
tinidazol hepat	2
ranitidin hepat	2
ration remuner	2
triethylen tetramin	2
clofazimin leprosi	2
quinidin hepatotox	2
regul abort	2
isoniazid hepat	2
letter isoniazid	2
chloroquin poison	2
effect griseofulvin	2
diseas adult	2
jaundic rifampicin	2
medic sex	2
self-poison colchicin	2
colchicin toxic	2
side-effect indomethacin	2
ketoconazol liver	2
diphenylhydantoin-induc hepat	2
hepatotox zimelidin	2
diclofenac hepat	2
copper liver	2
effect ketoconazol	2
adenoma liver	2
ranitidin hepatotox	2
liver hypervitaminosi	2
mile doctor	2
hepatotox cysteamin	2
chlorpropamid hepat	2
mistleto hepat	2
arsen liver	2
misus androgen	2
methotrex guidelines--revis	2
diltiazem hydrochlorid	2
myocard methyldopa	2
dapson syndrom	2
cephalosporin hepat	2
disulfiram hepat	2
trimethoprim-sulfamethoxazole-induc cholestasi	2
herbal abortifaci	2
medical-industri complex	2
flutamid hepatotox	2
tamoxifen-induc steatohepat	2
aceclofenac-induc hepat	2
coumarin hepatotox	2
manag hyperthyroid	2
septic abort	2
hepatotox propylthiouracil	2
hepatotox flutamid	2
enalapril-induc hepatotox	2
norfloxacin-induc hepat	2
risperidone-associ hepatotox	2
hepat necrosi	2
hepat ecstasi	2
hepatotox clozapin	2
ketoconazole-induc hepatotox	2
losartan-induc hepatotox	2
hepatotox flutamid	2
toxicologi melatonin	2
isoniazid-rel hepat	2
hepatotox flutamid	2
glibenclamide-induc cholestasi	2
antiretrovir combin	2
colchicin updat	2
hepatotox flutamid	2
acarbose-associ hepatotox	2
raloxifene-associ hepat	2
risperidone-induc hepatotox	2
quinine-induc hepatotox	2
sotalol antiarrhythm	2
valaciclovir-induc hepat	2
hepatox enalapril	2
fentanyl dosag	2
venlafaxine-associ hepat	2
non-alcohol steatohepat	2
ticlopidine-induc cholestasi	2
minocycline-induc hepat	2
alfuzosin-induc hepatotox	2
risperidon effect	2
hepatotox botan	2
didanosine-induc hepat	2
ceftriaxone-associ nephrolithiasi	2
acetaminophen hepatox	2
meloxican-induc cholestasi	2
acut pharyng	2
arsen environment	2
trovafloxacin hepatotox	2
hepat hiv-infect	2
kava hepatotox	2
spironolactone-induc hepat	2
exolis hepatotox	2
propofol-infus syndrom	2
herbal hepatotox	2
liver lovastatin	2
nimesulide-induc hepatotox	2
mirtazapine-induc hepatotox	2
alcohol hepat	2
herbal remedi	2
pantoprazole-induc hepat	2
disulfiram-induc hepat	2
terbinafine-associ hepatotox	2
leukotrien antagonist	2
addict meprobam	2
hypervitaminosi report	2
acetaminophen-induc hepatotox	2
pregabalin pfizer	2
metformin hepatotox	2
manag hyponatremia	2
erythroderma hepat	2
hepatotox nimesulid	2
sildenafil-associ hepatotox	2
omeprazole-induc hepat	2
proton-pump-inhibitor-induc hepat	2
metformin-induc hepatotox	2
safeti bevacizumab	2
sulphasalazine-induc dress	2
drug-rel hepatotox	2
omalizumab asthma	2
migrain prophylaxi	2
anastrozole-induc hepatotox	2
finasteride-induc hepat	2
thalidomid saga	2
hypertens pregnanc	2
fda ketek	2
donepezil updat	2
pioglitazon hepatotox	2
acetaminophen hepatotox	2
loxapin schizophrenia	2
tobramycin-induc hepatotox	2
structur ghrelin	2
toxic kava	2
cocaine-induc hepatotox	2
clopidogrel-induc hepatotox	2
amiodaron hepatotox	2
toxic mepacrin	2
hepatocellular adenoma	2
antifung drug	2
aggress lymphoma	2
dalfampridin ampyra	2
sickle-cel diseas	2
drug migrain	2
rilonacept canakinumab	2
constip adult	2
pregabalin-induc hepatotox	2
levofloxacin revisit	2
tamoxifen-induc hepatotox	2
care acetaminophen	2
antithrombot drug	2
pitavastatin overview	2
metformin-induc hepatotox	2
respons teschk	2
vitamin intox	2
advic travel	2
lemon obes	2
propylthiouracil dilemma	2
hepatotox flutamid	2
cocain intox	2
drug epilepsi	2
antivir drug	2
consequ eosinophil	2
tumor transplant	2
vemurafenib-induc dress	2
acetaminophen-rel hepatotox	2
occup asthma	2
engin liver	2
clinic cytologi	2
expect manag	2
drug adhd	2
drug psoriasi	2
apixaban-induc hepatotox	2
kindl kidnei	2
colchicin overdos	2
smartphon addict	2
simvastatin-induc erythromelalgia	2
letter toxic asparaginas	3
career ambulatori medicin	3
drug-induc hepat injuri	3
gold liver biopsi	3
estrogen endometri cancer	3
hepatotox erythromycin deriv	3
hepatotox disulfiram-tr patient	3
epilepsi workshop profession	3
acut copper intox	3
hepat indapamid therapi	3
symposium morbid obes	3
updat effect penicillin	3
respiratori insuffici surgeri	3
isoniazid hepatotox report	3
paranoid schizophren biolog	3
cirrhosi due hypervitaminosi	3
tolazamide-induc hepat dysfunct	3
salicylate-induc hepatotox review	3
diflunisal-induc cholestat jaundic	3
diethylstilbestrol risk cancer	3
hepat dantrolen sodium	3
tetracyclin hepatotox review	3
isoniazid hepat adolesc	3
leprosi unit 1971-1973	3
truncu arteriosu communi	3
cholestat hepatosi cimetidin	3
letter aspirin hepat	3
letter quinidin hepatotox	3
unusu reaction chloroquine-primaquin	3
herb necrodegen hepat	3
allopurinol-induc granulomat hepat	3
auto-immun thyroid diseas	3
durat intrauterin contracept	3
methyldopa liver injuri	3
quandari qualiti assess	3
idiopath portal hypertens	3
women health care	3
health care crisi	3
letter paraben-induc dermat	3
famili medicin perspect	3
isoniazid-associ hepat patient	3
letter hepat propylthiouracil	3
letter disulfiram hepatotox	3
delai hepatotox methyldopa	3
research lifelin medicin	3
omeprazol liver function	3
week sulphasalazin syndrom	3
hepatotox cyproteron acet	3
hepatotox fluorouracil n-phosphonacetyl-l-aspart	3
safeti profil paroxetin	3
comment ketoconazol hepatotox	3
hepatotox associ piroxicam	3
practic medic educ	3
carcinoma peni experi	3
atrium-rel hepat report	3
granulocyt colony-stimul factor	3
methyldopa-induc granulomat hepat	3
overview fluoroquinolon safeti	3
wilson diseas scotland	3
doxazosin treatment hypertens	3
nilutamide-induc acut hepat	3
lithium-induc hyperbilirubinemia adolesc	3
captopril-induc cholestat jaundic	3
diagnosi magnesium-induc diarrhea	3
hepat caus simvastatin	3
acut amiodarone-induc hepat	3
sensit triazolam elderli	3
lyme diseas review	3
vitamin safeti issu	3
methotrex liver abnorm	3
hepat granulomas--an experi	3
hepat caus benzaron	3
cholestasi associ cinnarizin	3
excess mortal harlem	3
liver injuri cyclosporin	3
flutamide-induc liver failur	3
acetaminophen hepatotox alcohol	3
jaundic caus rifampicin	3
transaminas elev captopril	3
hepatotox herbal remedi	3
clotiazepam-induc acut hepat	3
glutathion s-transferas updat	3
nitrofurantoin toxic children	3
concept mental ill	3
airborn bacteria virus	3
micronodular cirrhosi thiabendazol	3
liver damag busulfan	3
hepatotox caus ketoconazol	3
acut sulphasalazin hepatotox	3
phenothiazine-induc cholestat jaundic	3
pneumocysti carinii pneumon	3
psychiatr effect cannabi	3
isoniazid rifampin hepatotox	3
hepat effect amiodaron	3
determin nitrat plasma	3
ceftriaxon revers cholelithiasi	3
synthet retinoid dermatologi	3
jaundic due albendazol	3
advers effect fluoroquinolon	3
dose cytarabin review	3
medic risk cocain	3
transfusion-transmit aid reassess	3
fatal amiodaron hepatox	3
amodiaquine-induc fulmin hepat	3
autoimmun multipl sclerosi	3
littl physician surplu	3
anticonvulsant-induc liver damag	3
safeti aspect omeprazol	3
propylthiouracil-induc cholestat jaundic	3
cimetidin toxic hepat	3
carbamazepine-induc acut cholang	3
disulfiram fulmin hepat	3
ketoconazol induc hepat	3
danazol cholestat hepat	3
amodiaquin flavoquin hepatotox	3
hepat reaction carbamazepin	3
hepat caus fenofibr	3
mitoxantron hepat toxic	3
cloxacillin-induc cholestat jaundic	3
amodiaquin flavoquin hepatotox	3
amoxapin associ hepatotox	3
lupu induc acebutolol	3
captopril-associ cholestat jaundic	3
gold-induc granulomat hepat	3
hepat reaction nifedipin	3
diltiazem granulomat hepat	3
hepat associ allopurinol	3
ketoconazole-induc fulmin hepat	3
potenti toxic ketoconazol	3
hepat caus ranitidin	3
androgen hepatocellular carcinoma	3
treatment pulmonari tuberculosi	3
chloramphenicol jaundic babi	3
tetracyclin liver pregnanc	3
hepat reaction nitrofurantoin	3
norethisteron jaundic sister	3
methyldopa liver damag	3
salicyl hepat report	3
letter isoniazid liver	3
quinidine-induc granulomat hepat	3
disulfiram hypersensit hepat	3
liver injuri salicyl	3
medic therapi gallston	3
clindamycin endocard hepatotox	3
oxacillin-induc hepat dysfunct	3
letter isoniazid hepat	3
letter isoniazid hepatox	3
hepatotox isoniazid report	3
letter aspirin hepatotox	3
toxic coli l-asparaginas	3
toxicolog studi mithramycin	3
isoniazid treatment tuberculosi	3
liver damag methotrex	3
methotrex hepat diseas	3
hepat caus erythromycin	3
jaundic treatment rifampicin	3
vascul allopurinol therapi	3
hepat isoniazid administr	3
hepatotox caffein theophyllin	3
transplacent carcinogenesi stilbestrol	3
hepatoren toxic tetracyclin	3
prolong chlorpromazin jaundic	3
methotrex liver toxic	3
jaundic associ amitriptylin	3
clinic studi mithramycin	3
acut iron intox	3
jaundic due chlorpromazin	3
fatal reaction acetazolamid	3
chronic hypervitaminosi adult	3
clinic evalu ceftriaxon	3
danazol liver damag	3
nadolol beta-adrenoceptor antagonist	3
hyperbilirubinaemia cyclosporin level	3
sulphasalazin hepatotox treatment	3
ketoconazole-induc hepat report	3
ketoconazol hepat reaction	3
hepat treatment ketoconazol	3
quinine-induc granulomat hepat	3
liver damag verapamil	3
biclon b-cell lymphoma	3
tamoxifen liver damag	3
acut cholecyst thiazid	3
associ smoke cardiomyopathi	3
carbamazepin induc hepat	3
hepatotox due disulfiram	3
trimethoprim-sulfamethoxazole-induc intrahepat cholestasi	3
betain treatment homocystinuria	3
homozygos chromosom retinoblastoma	3
cirrhosi induc vitamin	3
tizanidin treatment spastic	3
evalu neonatal-intensive-car program	3
tube feed reconsid	3
carbamazepine-induc liver injuri	3
hepat caus diclofenac	3
renodigest fistula apropo	3
zinc toxic rumin	3
arsenic-rel hepat angiosarcoma	3
advers reaction l-asparaginas	3
erythromycin ethylsuccin hepatotox	3
erythromycin ethylsuccinate-induc cholestasi	3
quinidine-induc subclin hepat	3
advers reaction trimethoprim-sulfamethoxazol	3
hepatotox acetylsalicyl acid	3
flucloxacillin-associ liver damag	3
time child accid	3
sick cilia syndrom	3
multiform quinidin toxic	3
complic baclofen overdosag	3
drug-induc liver diseas	3
acetylsalicyl acid-induc hepatotox	3
hydroxyurea induc hepat	3
life-threaten hypersensit sulindac	3
coumarin-associ hepat report	3
drug hepat porphyria	3
thiazid acut cholecyst	3
fluphenazin jaundic report	3
hydralazine-induc liver injuri	3
jaundic associ naproxen	3
sulindac clinoril hepat	3
hepat reactiv lamivudin	3
teratogen vitamin intak	3
cancer parent children	3
cholestasi imipenemcilastatin treatment	3
hepatotox desfluran anesthesia	3
acut hepatotox amiodaron	3
phenprocoumon-induc necrot hepat	3
suspect ciprofloxacin-induc hepatotox	3
ticlopidine-induc cholestat hepat	3
phenytoin hypersensit syndrom	3
eclampsia 8-year experi	3
ticlopidine-induc granulomat hepat	3
chaparr liver toxic	3
lead poison children	3
prolong methotrex sarcoidosi	3
neuromuscular block drug	3
stiff-man syndrom report	3
spironolacton hepat toxic	3
clozapine-induc toxic hepat	3
screen colorect cancer	3
longev medicar expenditur	3
pharmacologi h1-receptor-antagonist drug	3
ticlopidine-induc cholestat jaundic	3
flucloxacillin-associ hepat injuri	3
hepat side-effect antibiot	3
temafloxacin syndrom review	3
roxithromycin-induc herp hepat	3
hepatotox 6-mercaptopurin azathioprin	3
hepatotox due flutamid	3
methyldopa-induc hepat report	3
control chemotherapy-induc emesi	3
phenprocoumon-induc liver failur	3
cyclophosphamid relat hepatotox	3
administr cost hospit	3
hepatotox germand mice	3
anaphylact reaction ranitidin	3
ephedrin treatment obes	3
starvat modern world	3
phenytoin-induc chronic hepat	3
erythromycin-associ cholestat hepat	3
safeti antioxid vitamin	3
safeti profil nefazodon	3
hepatotox antituberculosi drug	3
safeti profil gemcitabin	3
dilantin hypersensit reaction	3
meperidin therapeut toxic	3
terfenadine-induc cholestat hepat	3
minocycline-induc liver injuri	3
isoniazid-rel fatal hepat	3
post-malaria neurolog syndrom	3
propylthiouracil-induc hepat damag	3
gemcitabin safeti overview	3
acut cholestasi fluoxetin	3
tizanidine-induc hepat injuri	3
antibiotic-associ hepat updat	3
quinolon induc hepat	3
cholestasi associ ticlopidin	3
ropivacaine--a local anesthet	3
taxoid root drug	3
anagrelid essenti thrombocythemia	3
progress fight aid	3
verapamil-associ liver injuri	3
acarbose-induc acut hepat	3
raloxifen postmenopaus osteoporosi	3
amoxicillin-clavulan acid hepatotox	3
pharmacokinet pharmacodynam hydroxyurea	3
metformin-induc acut hepat	3
methotrex hepatotox evid	3
diphenylhydantoin-induc hepat report	3
hepatotox caus captopril	3
ketoconazole-induc liver damag	3
tolcapon fulmin hepat	3
hepatotox due ticlopidin	3
hydroxyurea-induc fever hepat	3
gallston isofluran hepat	3
warn isotretinoin roaccutan	3
liver injuri ticlopidin	3
look epiphren diverticula	3
suspect carbamazepine-induc hepatotox	3
troglitazone-associ hepat failur	3
propofol-infus syndrom children	3
acupunctur treatment modal	3
acut hepat phytotherapi	3
breakfast mental health	3
iodin defici turkei	3
acut flutamide-induc hepat	3
endotheli dysfunct hypertens	3
meloxicam-induc liver toxic	3
cholestat hepat ticlopidin	3
cholestat liver dysfunct	3
oxaprozin-induc symptomat hepatotox	3
acut zolpidem overdose--report	3
herbal hepatotox syndrom	3
carbamazepine-induc hepat report	3
chronic intox doxycyclin	3
rosiglitazon hepat failur	3
gliclazide-induc acut hepat	3
potenti hepatotox lamotrigin	3
acut hypersensit delavirdin	3
entacapon parkinson diseas	3
review quetiapin effect	3
yohimbin erectil dysfunct	3
safeti profil fluoroquinolon	3
alendron treatment osteoporosi	3
rosiglitazon liver failur	3
pentoxifyllin alcohol hepat	3
mefloquine-induc acut hepat	3
cholestat hepat ticlopidin	3
risperidone-induc cholestat hepat	3
miglitol alpha-glucosidas inhibitor	3
efficaci safeti comfrei	3
drug- chemical-induc cholestasi	3
clozapine-induc toxic hepat	3
hirsut flutamid hepatotox	3
hepatopathi induc ticlopidin	3
ziprasidon geodon schizophrenia	3
benzylpenicillin-induc prolong cholestasi	3
alendronate-induc hepatocellular lesion	3
thiazolidinedion liver toxic	3
ornidazole-induc autoimmun hepat	3
analysi wine penicillin	3
coronari surgeri ag	3
histori quinolon effect	3
terbinafine-induc hepat dysfunct	3
sever liver injuri	3
hepatotox induc fosinopril	3
mechan indinavir-induc hyperbilirubinemia	3
diabet ketoacidosi pheochromocytoma	3
ketoprofen-induc acut hepat	3
arsen liver diseas	3
gatifloxacin-associ acut hepat	3
ranitidine-induc cholestat jaundic	3
sirolimu comprehens review	3
hepat safeti itraconazol	3
losartan-induc hepat injuri	3
ticlopidine-induc hepat report	3
anticonvuls hypersensit syndrom	3
safeti concern kava	3
urea cycl disord	3
ticlopidine-associ cholestat hepat	3
esomeprazol clinic review	3
linezolid oxazolidinon antimicrobi	3
amantadin parkinson diseas	3
zafirlukast-induc acut hepat	3
therapeut applic fenugreek	3
question antimalari amodiaquin	3
safeti toler linezolid	3
hiv treatment-associ hepat	3
toxicolog potenti khat	3
drug-induc sever jaundic	3
hepatotox antibiot antifung	3
hepatotox hypolipidem drug	3
anticonvuls drug hypersensit	3
phenobarbit sensit syndrom	3
hepatomegali diabet mellitu	3
jaundic chlorpromazin therapi	3
hepat follow isoniazid	3
advers reaction meprobam	3
jaundic administr methylestrenolon	3
oral methyltestosteron jaundic	3
prochlorperazin chronic psychos	3
cholestat jaundic tolbutamid	3
untoward reaction iloson	3
hepat reaction tetracyclin	3
meprobam decad experi	3
summari experi 6-mercaptopurin	3
icteru imipramin therapi	3
lower plasma homocystein	3
acut hepat minocyclin	3
reassess rey syndrom	3
irbesartan-induc acut hepat	3
emerg contracept otc	3
gabapentine-induc acut hepat	3
hypervitaminosi report adult	3
dimercaprol hepatolenticular degener	3
vitamin intox report	3
leflunomide-induc acut hepat	3
drug intermitt claudic	3
nimesulide-induc acut hepatotox	3
factiti granulomat hepat	3
health effect fat	3
remifentanil intraop anesthesia	3
cholestasi hiv-infect patient	3
omeprazole-induc hepatotox report	3
burden terror malaysia	3
antioxid abil ag	3
nefazodone-induc liver failur	3
coronari arteri diseas	3
hepatotox due trazodon	3
hormon stress brain	3
valproate-induc hyperammonem encephalopathi	3
clinic pharmacokinet levetiracetam	3
moxifloxacin--a fluoroquinolon antibacteri	3
manag thalidomid toxic	3
cephalexin-induc cholestat hepat	3
unusu appar maling	3
ecstasy-induc toxic hepat	3
bacteri transloc cirrhosi	3
ertapenem review carbapenem	3
amiodaron toxic surveil	3
pramlintid symlin diabet	3
tigecyclin novel glycylcyclin	3
adalimumab review effect	3
risperidone-induc immunoallerg hepat	3
cost-effect implant cardioverter-defibril	3
alefacept safeti profil	3
acut hepat atovaquoneproguanil	3
ramelteon rozerem insomnia	3
prophylaxi bipolar disord	3
babesia--a histor overview	3
ketamin medicin misus	3
paracetamol induc hepatotox	3
unusu 4-aminopyridin toxic	3
ivermectin-induc sever hepat	3
rhabdomyolysi therapi daptomycin	3
noni juic hepatotox	3
assess statin safeti	3
half-lif hepat virion	3
acetaminophen aminotransferas elev	3
tamoxifen-induc non-alcohol steatohepat	3
amiodaron atrial fibril	3
nevirapine-induc fulmin hepat	3
atomoxetine-induc hepat child	3
clinic pharmacokinet escitalopram	3
compar review carbapenem	3
hepatotox induc amoxicillin	3
propofol infus syndrom	3
carbamazepin hepatoxicity--a report	3
effect hiv therapi	3
clinic consider corticosteroid	3
amiodarone-induc hepat polyneuropathi	3
lenalidomide-induc sever hepatotox	3
sensit skin limit	3
aldesleukin recombin interleukin-2	3
drug hiv infect	3
black cohosh-induc hepat	3
budesonideformoterol symbicort asthma	3
neuroimag pediatr endocrinologist	3
mechan action niacin	3
sevofluran liver dysfunct	3
dasatinib-induc acut hepat	3
acut acetaminophen overdos	3
bicalutamide-associ fulmin hepatotox	3
accident acetaminophen overdos	3
rey s-like syndrom	3
sorafenib-induc liver failur	3
doxycyclin induc hepat	3
levetiracetam treatment epilepsi	3
vareniclin tobacco depend	3
abacavir-induc hepatotox report	3
thalidomide-induc sever hepatotox	3
hydralazine-induc cholestat hepat	3
hepatotox relat escitalopram	3
hepat cytolysi infliximab	3
donepezil-rel toxic hepat	3
alpha-methyldopa hepatotox pregnanc	3
review primari hyperparathyroid	3
safeti toler omalizumab	3
pharmacodynam memantin updat	3
extens drug-resist tuberculosi	3
vascular disord liver	3
hepat caus lotus-f3	3
intrahepat cholestasi pregnanc	3
network methotrex toxic	3
ag neuropathologi dementia	3
acetaminophen safeti deja	3
conquest wilson diseas	3
moxifloxacin hepat toxic	3
exenatide-induc acut pancreat	3
topiramate-induc acut hepat	3
linezolid-induc lactic acidosi	3
hepatotox induc immunosuppress	3
manag clozapine-rel hepatotox	3
safeti toler etravirin	3
aloe-induc toxic hepat	3
hepatotox associ herbalif	3
antivir drug influenza	3
ferrou sulphat poison	3
trajectori disabl life	3
ibuprofen-induc hypersensit syndrom	3
atorvastatin safeti toler	3
malaria surveil unit	3
ofatumumab arzerra cll	3
zolpidem poison cat	3
acut liver failur	3
treatment atrial fibril	3
underinsur children unit	3
hepatotox khat chew	3
hepatotox alpha-methyldopa pregnanc	3
ranitidin induc hepat	3
sibutramin meridia withdrawn	3
triple-neg breast cancer	3
health hazard tell	3
ella emerg contracept	3
glucosamin chondroitin sulfat	3
denosumab bone metastas	3
drug-induc autoimmune-lik hepat	3
acut hiv-1 infect	3
ibuprofen-induc cholestat hepat	3
lapatinib-induc hepat report	3
pharmacokinet evalu levocetirizin	3
roflumilast daliresp copd	3
urinari tract infect	3
gemfibrozil hepatotox report	3
naproxen-induc liver injuri	3
amiodarone-induc acut hepatotox	3
rankl pathwai denosumab	3
phototherapi ag biolog	3
patient facial transplant	3
argininosuccin lyas defici	3
comfrei clinic overview	3
ruxolitinib jakafi myelofibrosi	3
drug rheumatoid arthriti	3
allopurinol-induc dress syndrom	3
methimazole-induc liver injuri	3
ammonium metabol human	3
orphan kidnei diseas	3
dabigatran-induc acut hepat	3
drug weight loss	3
linaclotid linzess constip	3
myth presumpt obes	3
vemurafenib-associ pancreat report	3
dronedarone-associ hepatotox propo	3
mauriac syndrom exist	3
fetuin-a level hyperthyroid	3
drug psychiatr disord	3
clozapin toxic hepat	3
plan one-step otc	3
tradit influenza vaccin	3
recreat drug abus	3
ospemifen osphena dyspareunia	3
trametinib global approv	3
hypoglycemia kabuki syndrom	3
benefit risk splenectomi	3
albendazole-induc recurr hepat	3
drug-induc liver injuri	3
system biologi hepatologist	3
hydroxycut-induc liver toxic	3
tedizolid oxazolidinon antimicrobi	3
dabrafenib treatment melanoma	3
dsm-5 neurocognit disord	3
time tobacco-fre militari	3
breast cancer updat	3
cogan syndrom pregnanc	3
syndrom thrombot microangiopathi	3
miltefosin impavido leishmaniasi	3
drug-induc immun neutropeniaagranulocytosi	3
imag pituitari pathologi	3
role spect-ct radiotherapi	3
tempor crescent syndrom	3
clinic aspect leprosi	3
mesalazine-induc acut hepat	3
progress osteochondr dissecan	3
zoonot origin hepat	3
sleep women health	3
catch celiac diseas	3
ga induct pyloromyotomi	3
pasireotid acromegali review	3
drug psoriat arthriti	3
azithromycin-induc cholestat hepat	3
decept research particip	3
rolapit global approv	3
cariprazin global approv	3
necitumumab global approv	3
elvitegravir vitekta hiv	3
elotuzumab global approv	3
vitamin histor overview	3
amoxicillin-clavulanate-induc liver injuri	3
drug multipl myeloma	3
venetoclax global approv	3
olaratumab soft-tissu sarcoma	3
apixaban-induc liver injuri	3
drug hepatotox agent	3
drug type diabet	3
sarilumab global approv	3
avelumab global approv	3
niraparib global approv	3
durvalumab global approv	3
il-9 resolut inflamm	3
elus standard care	3
elimin hepat unit	3
paraneoplast syndrom ophthalmologi	3
manag fetal tumor	3
contracept transmasculin spectrum	3
molecular target cholangiocarcinoma	3
repli letter 20-0173r1	3
hepatotox erythromycin estol pregnanc	4
hepat complic antitubercul therapi	4
letter saralasin bolu test	4
liver damag long-term methyltestosteron	4
oral contracept malign hepatoma	4
measur permeabl singl capillari	4
cholestat hepat induc gold	4
intrahepat cholestasi griseofulvin administr	4
medic associ arsen exposur	4
sever hypersensit reaction allopurinol	4
formaldehyde-induc hemolysi chronic hemodialysi	4
annual discourse--do eat quail	4
multipl tumor androgen therapi	4
undesir effect gold salt	4
lymphocyte-medi cytotox isoniazid-associ hepat	4
drug-induc chronic liver diseas	4
tricycl antidepress review toxicologi	4
drug therapi review nitrofurantoin	4
financ graduat medic educ	4
multicentr trial labetalol zealand	4
health-mainten organ achiev save	4
cryptogen cirrhosi associ methyldopa	4
design random clinic trial	4
lethal orphenadrin intox report	4
anabol agent liver neoplasm	4
clofazimin treatment pyoderma gangrenosum	4
salicyl hepat juvenil dermatomyos	4
situ carcinoma vocal cord	4
competit deliveri medic care	4
ventricular fibril wolff-parkinson-whit syndrom	4
clinic hepatotox isoniazid children	4
effect interact antituberculosi drug	4
liver diseas vineyard sprayer	4
bromocriptin parkinson diseas studi	4
drug-induc chronic aggress hepat	4
maternal-fet relationship corticosteroid metabol	4
fatal peliosi liver spleen	4
cholestat jaundic caus d-penicillamin	4
take care hate patient	4
cimetidin cholestat jaundic children	4
hepatopathi follow irradi adriamycin	4
acetylsalicyl acid liver damag	4
clofibr therapi gallston induct	4
zinc phosphid poison dog	4
nutrient defici breast-f infant	4
acut hepat caus erythromycin	4
oral contracept birth defect	4
gerontologi geriatr medic educ	4
primer element medic decis	4
hepat ruptur anticoagul therapi	4
psychiatr nosologi indic psychopharmaceut	4
treatment server psoriasi pyrimethamin	4
multicellular origin parathyroid adenoma	4
stabil knee strengthen exercis	4
spectrum methyldopa liver injuri	4
letter isoniazid liver injuri	4
vitamin transport human toxic	4
commentari priority--childhood automobil safeti	4
letter prevent isoniazid hepatotox	4
arterioven shunt human spleen	4
experi peritoneo-ven shunt ascit	4
partial purif ovalbumin gene	4
coliti hepat caus methyldopa	4
metastat uterin leiomyomata report	4
imput motiv marijuana behavior	4
antiandrogen antirenotrop effect spironolacton	4
import calf vein thrombophleb	4
cardiac action arachidon acid	4
influenc cytostat leucocyt function	4
hepatotox rifampicin isoniazid children	4
psychiatri batter child medicin	4
treatment fungal infect flucytosin	4
futur chiropract psychosoci view	4
letter quinidin granulomat hepat	4
gain sixth stool guaiac	4
protect medic common respons	4
liver diseas caus propylthiouracil	4
editori perinatologi begin concept	4
hepat caus amitriptylin therapi	4
pascal wager hang crepe	4
beta-adrenerg mechan action tremor	4
prospect drug product ussr	4
homebound ag medic unreach	4
salicylate-induc injuri pyruvate-kinase-defici erythrocyt	4
commun medicin success failur	4
acut renal failur ecstasi	4
toxic death 34-methylenedioxymethamphetamin ecstasi	4
fatal hepat herbal tea	4
finasterid benign prostat hypertrophi	4
cholestasi caus hypersensit flurbiprofen	4
cytolyt hepat induc cisaprid	4
hepatotox 6-mercaptopurin crohn diseas	4
clinic pharmacokinet ketorolac tromethamin	4
worldwid safeti experi nabumeton	4
gall-bladd sludg lesson ceftriaxon	4
hepatotox hydroxy-methyl-glutaryl-coenzym reductas inhibitor	4
atrium-induc hepat autoimmun pattern	4
resid physician substanc specialti	4
complement receptor atherosclerot lesion	4
retinoid cofactor cell activ	4
vitamin statu children syndrom	4
low-dos methotrex therapi hepatotox	4
perspect pediatr unit germani	4
cholestat jaundic induc captopril	4
cranial fasciiti childhood report	4
hepatotox associ sustained-releas niacin	4
alexand fleme spectrum penicillin	4
suprem court liberti abort	4
clinic toler safeti azithromycin	4
hepat chronic abus senna	4
fatal hepatotox anti-tubercular chemotherapi	4
anaphylaxi administr intraven thiamin	4
famili occurr hypersensit phenytoin	4
periton fluid patient endometriosi	4
european core curriculum radiotherapi	4
pitfal nsaid therapi elderli	4
interferon-induc chronic activ hepat	4
pretransplant blood transfus revisit	4
phenytoin hypersensit syndrom report	4
mesalazin global safeti evalu	4
brain tissu elast csf	4
lifetim nurs home care	4
acetaminophen isoniazid hepat toxic	4
smoke mortal women commun	4
hepat due etretin report	4
cyclosporin toxic organ kidnei	4
fulmin hepat lisinopril administr	4
penbutolol beta-adrenerg block agent	4
secret biliari lipid hepatocyt	4
biliari calcium gallston format	4
coffe caffein cardiovascular diseas	4
cathepsin prognosi breast cancer	4
delai childbear outcom pregnanc	4
thioridazine-induc non-icter hepatotox report	4
acut hepat caus flutamid	4
hepat hypervitaminosi famili observ	4
advers effect propofol diprivan	4
phenobarbit hepatotox 8-month-old infant	4
fatal hepat caus disulfiram	4
busulfan veno-occlus diseas liver	4
accident overdos insuffl colchicin	4
dantrolen sodium hepat injuri	4
trimetrex pneumocysti carinii pneumonia	4
global safeti evalu etodolac	4
oral contracept liver cancer	4
liver toxic retinoid therapi	4
suprem court privaci abort	4
neoantigen associ halothan hepat	4
aztreonam cystic fibrosi patient	4
manag ag dental patient	4
histori sleep sick kenya	4
clinic trial intraligamentari anesthesia	4
neonat hypoxia hemocoagul chang	4
wider test hiv infect	4
isoniazid-rifampicin-induc submass hepat necrosi	4
follow-up studi tolmetin user	4
fatal labetalol-induc hepat injuri	4
clozapine-induc cholestat jaundic report	4
miss portal vein thrombosi	4
manifest sarcoidosi optic nerv	4
cardiorespiratori pattern viral septicemia	4
food fiber phytobezoar format	4
hepatotox etoposide-ifosfamid combin therapi	4
hepatotox drug commonli rheumatologi	4
famotidin postmarket clinic experi	4
express opioid peptid tumor	4
danger methotrexateetretin combin therapi	4
cholecyst secondari infus chemotherapi	4
lack associ spermicid trisomi	4
immunolog effect kinet glucocorticosteroid	4
aid epidem multidisciplinari troubl	4
cancer liver oral contracept	4
pituitari tumor contain cholecystokinin	4
hepatotox methotrex rheumat diseas	4
hydroxychloroquin treatment rheumatoid arthriti	4
erythromycin-induc hepat simul malign	4
chrysotherapi induc hepat damag	4
immunolog complex lymphoblast lymphoma	4
leucin metabol stabl cirrhosi	4
hepat cholestasi induc trimethoprim	4
prospect payment psychiatry--feas impact	4
chang class nsaid hepatotox	4
hepat associ carbamazepin therapi	4
hepatotox due atractyli gummifera-l	4
transmiss human immunodefici viru	4
hepatotox effect anabolicandrogen steroid	4
clinic pharmacokinet felodipin summari	4
cholestat hepat caus d-penicillamin	4
propranolol precipit hepat encephalopathi	4
cours nephropath cystinosi ag	4
medic complic cocain abus	4
acut hepat caus indomethacin	4
albendazol hydatid disease--hepatocellular toxic	4
methotrexate-induc liver cirrhosi follow-up	4
smoke women tragedi major	4
fatal liver damag diclofenac	4
hyperbilirubinemia treatment chenodeoxychol acid	4
cholestat hepat dicloxacillin-sodium therapi	4
glipizid induc toxic hepat	4
safeti ticarcillin disodiumpotassium clavulan	4
effect disulfiram liver function	4
optic-nerv degener alzheim diseas	4
d-penicillamin induc cholestat jaundic	4
cholestat hepat secondari propylthiouracil	4
isoniazid prophylaxi hepat carrier	4
fatal hepat associ diclofenac	4
acut hepat caus plethoryl	4
cholestat jaundic associ methyldopa	4
comparison nation cesarean-sect rate	4
propylthiouracil-induc fatal hepat necrosi	4
peliosi hepati liver ruptur	4
toxic hepat caus captopril	4
sulindac hepatotox report review	4
clinic studi aztreonam japan	4
teach hospit endang speci	4
non-c17-alkyl steroid long-term cholestasi	4
azathioprin toxic neuromuscular diseas	4
liver involv sulfon syndrom	4
aldehyd dehydrogenas alcohol subject	4
salicylate-induc hepat rheumat fever	4
hepat associ propylthiouracil treatment	4
cimetidine-induc liver injuri report	4
bowel irrig toxic ingest	4
liver biopsi methotrex treatment	4
abdomin pain erythromycin estol	4
mithramycin paget diseas bone	4
clinic trial cis-diamminedichloroplatinum nsc-119875	4
letter jaundic associ naproxen	4
letter hepatoma oral contracept	4
hepatocellular damag due methyldopa	4
isoniazid administr liver injuri	4
streptozotocin therapi metastat insulinoma	4
clinic experi mitomycin nsc-26980	4
arsen intox water unit	4
oxandrolon growth stimul children	4
hepat cell adenoma report	4
halothan hepat critic review	4
erythromycin estol liver toxic	4
iron intox adult patient	4
hepat necrosi caus furosemid	4
sulfonamide-induc chronic liver diseas	4
effect rifampicin clinic studi	4
irrevers liver damag azathioprin	4
chronic adult hypervitaminosi hypercalcemia	4
liver disord inder therapi	4
drug-induc activ chronic hepat	4
methyldopa-induc submass hepat necrosi	4
editori aspirin-induc hepat injuri	4
hepatocellular jaundic treatment ibuprofen	4
chemic structur erythromycin hepatotox	4
jaundic acut pustular psoriasi	4
effect isoniazid transaminas level	4
halothan hepatitis--a report five	4
clinic trial protriptylin vivactil	4
control comparison imipramin protriptylin	4
clinic studi 1-2-chloroethyl-3-cyclohexyl-1-nitrosourea nsc	4
carbenicillin therapi pseudomona infect	4
cyclophosphamid organ transplant human	4
genital-tract cancer adolesc adult	4
effect rifampicin liver function	4
advers reaction rifampicin treatment	4
sever liver toxic methyldopa	4
summari clinic statu asparaginas	4
effect oral contracept liver	4
thiabendazol treatment trichinosi human	4
influenc chlorpromazin hepat function	4
anicter hepat induc diphenylhydantoin	4
atyp pictur pityriasi versicolor	4
long-term monitor clofibr therapi	4
hepatotox methotrex treatment psoriasi	4
serum transaminas salicyl therapi	4
budd-chiari syndrom oral contracept	4
acut copper sulphat poison	4
syndrom heaptiti aplast anemia	4
hepat microanatomi hypervitaminosi rat	4
tetracyclin toxic nonpregn woman	4
cholestat jaundic imipramin therapi	4
acut copper sulfat poison	4
clinic trial 13-bis2-chloroethyl-1-nitrosourea nsc-409962	4
biliari cirrhosi induc chlorpromazin	4
hepat toxic tetracyclin pregnanc	4
liver damag caus carbamazepin	4
physiopathologi icteru caus chlorpromazin	4
hepatocellular damag ethacryn acid	4
record massachusett hospit 32-1967	4
agranulocytosi jaundic associ chlorpromazin	4
occup ritual patient manag	4
toxic pyrrolizidin alkaloid comfrei	4
obstruct jaundic pancytophenia hydralazin	4
ranitidin pilot studi japan	4
hepat reaction ketoconazol treatment	4
carbamazepine-induc non-hereditari acut porphyria	4
sulfasalazin advers effect desensit	4
absenc cross-react captopril enalapril	4
acut iron poison children	4
toxic hepati ketoconazol treatment	4
oral contracept hepatocellular carcinoma	4
androgen-associ hepatoma hemodialysi patient	4
hepat dysfunct ketoconazol therapi	4
effect long-term amiodaron therapi	4
hepat adenoma oral contracept	4
immunolog aspect phenobarbit hypersensit	4
acebutolol lupu syndrom apropo	4
therapeut efficaci hemodialysi schizophrenia	4
data prevent treatment isoniazid	4
cocaine-medi hepatotox critic review	4
peliosi hepati renal transplant	4
hla antigen gold toxic	4
preclin toxicologi bupropion overview	4
yogurt--an autodigest sourc lactos	4
undesir effect gold therapi	4
disulfiram toxicity--a review literatur	4
piperacillin review clinic experi	4
acetaminophen overdos fetal demis	4
metast behavior supersatur bile	4
dissolut rate cholesterol monooctanoin	4
disulfiram-induc hepatitis--report review literatur	4
morpholog featur liver abetalipoproteinemia	4
revers hepatotox relat amphotericin	4
propylthiouracil hepat review literatur	4
liver fatal exert heatstrok	4
breast cancer cigarett smoke	4
hepat manifest phenobarbit hypersensit	4
etretin tigason hepat patient	4
heparin-induc increas serum aminotransferas	4
median- long-term toler diltiazem	4
hepat caus isoniazid studi	4
cimetidin advers reaction pattern	4
hepat captopril combin therapi	4
cost effect lead screen	4
social environ cancer mortal	4
valu autopsi medic era	4
acetaminophen chronic liver diseas	4
enfluran hepatotox clinicopatholog studi	4
carbamazepin methyldopa hepatotox combin	4
phenytoin induc granulomat hepat	4
hepatotox erythromycin estol ethylsuccin	4
hepat due erythromycin ethylsuccin	4
hepat associ captopril treatment	4
natur suffer goal medicin	4
ticarcillin follow carbenicillin-associ hepatotox	4
suspect canin storag diseas	4
enhanc gastroduoden motil children	4
liver lesion oral contracept	4
hepat follow cimetidin administr	4
ticlopidin blood liver involv	4
nitrofurantoin chronic activ hepat	4
safeti anticonvuls hepat porphyria	4
hepatotox due treatment verapamil	4
granulomat hepat secondari carbamazepin	4
cholestat hepat caus penicillamin	4
intrahepat cholestasi due trimethoprim-sulfamethoxazol	4
oral contracept liver diseas	4
spironolacton hepat primari hyperaldosteron	4
hypertransaminasemia subcutan heparin therapi	4
penicillamin induc liver involv	4
cholera--a endem focu unit	4
nitrofurantoin-induc chronic activ hepat	4
readabl surgic consent form	4
threshold approach clinic decis	4
liver involv treatment naproxen	4
hepat damag caus allopurinol	4
fever secondari triamteren therapi	4
salicyl hepatotox rheumatoid arthriti	4
lymphocyt sensitis nifedipine-induc hepat	4
flucloxacillin hepatitis--an australian epidem	4
safeti antioxid vitamin beta-caroten	4
ceftriaxone-associ gallbladd lithiasi children	4
mitochondri toxic antivir drug	4
drug-induc liver disease--a review	4
nsaid-induc hepatotox aceclofenac diclofenac	4
piperacillintazobactam beta-lactambeta-lactamas inhibitor combin	4
evid human meconium glycoasparagin	4
ubiquitin homeostasi develop diseas	4
safeti complementari medicin monitor	4
advers effect monobactam carbapenem	4
lupu erythematosu liver diseas	4
perspect childhood multipl sclerosi	4
idiopath acut pancreat sarcoidosi	4
current method mutat detect	4
probabl ticlopidine-induc cholestat hepat	4
intrahepat cholestasi due ticarcillin-clavulan	4
cholestat hepat associ tenoxicam	4
hepat injuri vitamin ingest	4
nizatidine-induc subfulmin hepat failur	4
hypersensit hepat due pyrazinamid	4
analysi rotat cuff repair	4
litig chronic facial pain	4
cari preval belgium netherland	4
recent advanc radiat oncologi	4
metronidazole-associ hepatotox hemodialyz patient	4
ciprofloxacin-induc acut cholestat jaundic	4
sever hepat caus phenobarbit	4
heparin transaminas enigma import	4
chronic hepat caus lisinopril	4
multisystem advers reaction lamotrigin	4
variabl radiologist interpret mammogram	4
herbal medicin toxic hepat	4
sonograph demonstr pseudo-cholelithiasi ceftriaxon	4
fulmin hepat flutamid treatment	4
intranas budesonid allerg rhiniti	4
difficult issu second-trimest abort	4
niacin-induc hepat thrombocytopenia niacin	4
cyclophosphamide-induc hepat wegen granulomatosi	4
side-effect clozapin follow-up studi	4
advers event triazolam substitut	4
immun mechan cardiac diseas	4
augmentin-induc cholestat jaundice--a report	4
diabet risk pancreat cancer	4
hepatotox due verapamil hydrochlorid	4
fulmin hepat caus disulfiram	4
hepatotox due erythromycin ethylsuccin	4
sexual harass medic train	4
nisoldipin dihydropyridin calcium-channel blocker	4
assess implement physician-pay reform	4
chromium human nutrit review	4
acetaminophen hepatotox potenti isoniazid	4
hepatotox induc droxicam present	4
toxic hepat clozapin treatment	4
interferon beta-1b multipl sclerosi	4
ticlopidine-induc cholestat hepat report	4
pseudo-cholang form erythromycin-induc hepat	4
probabl ciprofloxacin induc cholestasi	4
cost visit emerg depart	4
hepat injuri caus acarbos	4
fulmin hepat caus flutamid	4
hepatotox transplant immunosuppress agent	4
liver disfunct due ciprofloxacin	4
acut encephalopathi attribut 5-fu	4
help syndrom anesthet manag	4
toler safeti profil famotidin	4
toxic hepat caus aceclofenac	4
cholestat jaundic induc ciprofloxacin	4
cidofovir therapi cytomegaloviru retin	4
tramadol central act analges	4
acarbose-induc acut sever hepatotox	4
acarbos review clinic experi	4
oral terbinafin antifung agent	4
hepat toxic caus aceclofenac	4
acut cholestasi caus ticlopidin	4
postmenopaus hormon therapi mortal	4
phenytoin-lik hypersensit associ lamotrigin	4
cholestat jaundic due terbinafin	4
chronic hepat relat fluoxetin	4
protract cholestat hepat prostata	4
ticlopidin induc cholestat jaundic	4
liver failur caus flutamid	4
terbinafine-induc cholestat liver injuri	4
fatal iron intox infant	4
antithrombot agent thromboembol diseas	4
tamsulosin benign prostat hyperplasia	4
conflict debat calcium-channel antagonist	4
acut hepat associ terbinafin	4
bentazepam-induc hepat bridg necrosi	4
ticlopidine-induc acut cholestat hepat	4
hepat dysfunct associ troglitazon	4
methotrex psoriasi consensu confer	4
niacin help cholesterol--harm liver	4
olanzapin treatment-resist bipolar disord	4
diclofenac-associ acut cholestati hepat	4
partial-birth abort congress constitut	4
rapid onset risperidone-induc hepatotox	4
recombin interleukin-11 chemotherapy-induc thrombocytopenia	4
unusu amoxicillinclavulan acid-rel hepatotox	4
manag advers effect clozapin	4
tramadol hydrochlorid overview current	4
autoimmun hepat induc fibrat	4
acut hepat due ecstasi	4
lamotrigine-associ anticonvuls hypersensit syndrom	4
propofol infus syndrom children	4
fatal hepatotox associ troglitazon	4
bladder infiltr mesenter pannicul	4
diagnost strategi abdomin injuri	4
extracrani cephal schwannoma apropo	4
omeprazol develop acut hepat	4
toxic hepat caus flutamid	4
sever hepatotox associ troglitazon	4
acut hepat relat omeprazol	4
ultrasonograph find niacin-induc hepat	4
terbinafin fulmin hepat failur	4
criteria recommend vitamin intak	4
mitochondri deaf mutat review	4
hepatotox associ zolpidem treatment	4
non-immunoallerg hepatotox due mesalazin	4
bacteri colon ureter stent	4
vascular calcaneum clinic consequ	4
clinic potenti cyclooxygenase-2-specif inhibitor	4
cost chickenpox canada uncompl	4
minocycline-induc autoimmun syndrom overview	4
hepatotox possibli caus amphotericin	4
ticlopidine-induc prolong cholestasi report	4
immunobiologi bile biliari epithelium	4
system safeti fexofenadin hcl	4
comt inhibitor parkinson diseas	4
delayed-onset ticlopidine-induc cholestat jaundic	4
short-term propofol infus children	4
clodron caus aminotransferas elev	4
zanamivir review clinic safeti	4
nimesulid acut hepat descript	4
ceftriaxone-associ nephrolithiasi biliari pseudolithiasi	4
incid ceftriaxone-associ gallbladd pseudolithiasi	4
acut eosinophil hepat trovafloxacin	4
fatal hepat associ nimesulid	4
fatal hepat associ ranitidin	4
hepat injuri due troglitazon	4
stevens-johnson syndrom due nevirapin	4
mortal pneumonia children unit	4
hepatotox amoxicillinclavulan acid report	4
late-onset troglitazone-induc hepat dysfunct	4
erythromycin-induc primari biliari cirrhosi	4
nefazodone-induc acut liver failur	4
hepat injuri associ nitrofurantoin	4
asymptomat diclofenac-induc acut hepat	4
symptomat pseudolithiasi caus rocephalin	4
anaphylaxi intraven thiamine--long forgotten	4
acut hepat induc bupropion	4
assess levetiracetam anti-epilept drug	4
hydroxyurea caus drug fever	4
acut hepat induc candesartan	4
comt inhibitor liver toxic	4
nimesulid toxic hepat pregnanc	4
nebul budesonid asthma children	4
candesartan acut liver injuri	4
report olanzapine-induc hypersensit syndrom	4
hypersensit syndrom associ azithromycin	4
drug hypersensit syndrom pathogenesi	4
manag anti-tuberculosi drug-induc hepatotox	4
erythropoietin procrit epogen revisit	4
analysi cilostazol safeti databas	4
cholestat jaundic associ metformin	4
sever ciprofloxacin-induc acut hepat	4
metabol toxic antiretrovir therapi	4
fatal hepatox secondari nimesulid	4
metolazone-induc cholestat liver diseas	4
analysi common effect isotretinoin	4
ticlopidin cholestasi hepat nodul	4
acut hepat induc valsartan	4
fatal hepatotox associ enalapril	4
darbepoetin aranesp long-act erythropoietin	4
convent treatment hypercalcemia malign	4
cholestat hepat caus gemfibrozil	4
hepatotox acut iron poison	4
outcom adulthood very-low-birth-weight infant	4
troglitazon rezulin hepat injuri	4
promot prescript drug consum	4
asymptomat hepat induc propylthiouracil	4
carisoprodol unrecogn drug abus	4
hepatotox caus breynia officinali	4
evalu isol report hepatotox	4
variat morbid radic prostatectomi	4
ziprasidon fifth atyp antipsychot	4
acetaminophen toxic suicid accident	4
sever liver damag terbinafin	4
kava-induc acut icter hepat	4
gatifloxacin-induc fulmin hepat failur	4
toll-lik receptor polymorph atherogenesi	4
moxifloxacin-induc acut liver injuri	4
tamoxifen-rel porphyria cutanea tarda	4
rhabdomyolysi concurr atorvastatin diltiazem	4
multiorgan failur induc atorvastatin	4
immune-medi drug-induc liver diseas	4
beta interferon multipl sclerosi	4
interpret virolog test hepat	4
safeti concern kava uniqu	4
entacapone-induc hepatotox hepat dysfunct	4
gamma hydroxybutyr xyrem narcolepsi	4
nephron patient primari hypertens	4
paracetamol-induc hepatotox recommend dosag	4
sjogren syndrom evolv therapi	4
valsartan-induc hepatotox hbs-ag-posit patient	4
acut hepat due montelukast	4
recurr cholestasi due ampicillin	4
preclin safeti profil alendron	4
memantin moderate-to-sever alzheim diseas	4
alefacept amev treatment psoriasi	4
kava-kava lesson phytomedicin commun	4
acut hepat induc kava	4
acut hepat due bentazepam	4
interleukin-1-receptor antagonist muckle-wel syndrom	4
acut hepat parenter amiodaron	4
bortezomib velcad multipl myeloma	4
hepatotox complementari altern medicin	4
safeti pharmacologi oseltamivir clinic	4
fatal acut topiram toxic	4
ephedra perspective--a current review	4
acetaminophen intox length treatment	4
benefit-risk assess rosuvastatin milligram	4
hypervitaminosi report adult male	4
mycophenol mofetil treatment scleriti	4
ferrou sulfat poison nonfat	4
fatal iron intox child	4
fatal agranulocytosi treatment amodiaquin	4
celontin pm-396 treatment epilepsi	4
allergi chlorpromazin manifest jaundic	4
hepatotox due chlorambucil report	4
late prognosi chlorpromazin jaundic	4
studi chlorpropamid diabet patient	4
valproate-associ hepatotox treat l-carnitin	4
hepat caus amine-oxidase-inhibit drug	4
drug-induc hepat injuri marplan	4
jaundic due prochiorperazin compazin	4
jaundic follow thioridazin administr	4
chloramphenicol aplast anemia report	4
liver autoantibodi drug-induc jaundic	4
vincristin treatment lymphoma leukemia	4
chronic hypervitaminosi report adult	4
jaundic oral antidiabet therapi	4
oral contracept liver damag	4
mithramycin treatment embryon cancer	4
clinic observ side-effect haloperidol	4
fatal prolong chlorpromazin jaundic	4
jaundic relat therapeut agent	4
manag acut iron poison	4
oral contracept liver damag	4
hepatotox produc tetracyclin overdosag	4
oral contracept liver injuri	4
acut anaphylactoid reaction probenecid	4
jaundic methimazol tapazol administr	4
erythromycin hepato-sensit preliminari report	4
acut hepat rash fluconazol	4
ductopen hepat relat enalapril	4
gatifloxacin-induc hepatotox acut pancreat	4
cilostazol review intermitt claudic	4
ferrou sulfat poison report	4
flutamide-associ acut liver failur	4
atorvastatin trigger autoimmun hepat	4
manufactur dairi protein fraction	4
art liver-rel mortal hivhcv	4
norm ethic sport medicin	4
popul genom drug respons	4
portrai psychotrop drug advertis	4
pulmonari complic radiat therapi	4
kava examin report toxic	4
physician internet information-seek behavior	4
trend leprosi detect worldwid	4
mechan atpases--a multi-disciplinari approach	4
post-haemorrhag vasopressin releas blood	4
nucleosid analogu mitochondri toxic	4
hepatotox induc celecoxib amlodipin	4
kava hepatotox closer truth	4
hepatotox due camelia sinensi	4
leflunomid treatment rheumatoid arthriti	4
cardiovascular risk stage nephropathi	4
anticonvuls treatment bipolar disord	4
amoxicillin induc acut hepat	4
glimepiride-induc cute cholestat hepat	4
liver toxic associ flutamid	4
muscl pain associ daptomycin	4
risk herbal medicin product	4
jaundic methyl testosteron therapi	4
liver injuri associ beta-interferon	4
risk advers event fibrat	4
fatal overdos associ quetiapin	4
acut hepatotox caus repaglinid	4
fatal hepat failur valproat	4
cholestat hepat associ repaglinid	4
linezolid associ lactic acidosi	4
autoimmun hepat risperidone-induc cholestat	4
dress syndrom allopurinol dakar	4
nitazoxanid thiazolid antiparasit agent	4
life-threaten complic dermatolog therapi	4
drug-induc hepat saquinavirritonavir rifampin	4
clinic practic rehabilit stroke	4
ceftriaxone-associ gallbladd pseudolithiasi report	4
statin risk colorect cancer	4
cdp-870 certolizumab rheumatoid arthriti	4
antimicrobi safeti focu fluoroquinolon	4
toxic hepat associ paroxetin	4
toxic hepat flutamid treatment	4
hepat fibrosi antidepress treatment	4
hepatotox noni juic report	4
alkaloid spong monanchora unguifera	4
regul neurogenesi angiogenesi depress	4
headach seizur woman postpartum	4
cytolyt hepat esomeprazol chemotherapi	4
drug insight appetit suppress	4
infliximab lymphoma sever hepat	4
hepat due chines herb	4
myelotox hepatotox azathioprin therapi	4
intermedi dose 5-fluorouracil-induc encephalopathi	4
methyldopa-induc acut toxic hepat	4
palmetto benign prostat hyperplasia	4
abatacept orencia rheumatoid arthriti	4
metabol mechan stress hyperglycemia	4
valvular heart diseas pregnanc	4
famili obes predictor child	4
neoadjuv therapi oper breast-canc	4
statin safeti systemat review	4
deferasirox exjad iron chelat	4
intervent paracetamol acetaminophen overdos	4
ceftriaxone-associ biliari pseudolithiasi children	4
antivir drug cytomegaloviru diseas	4
sever hepat effect ezetimib	4
mycophenol sodium-induc hepatotox report	4
autoimmun hepat trigger statin	4
echinocandin candidemia adult neutropenia	4
microscopic-observ drug-suscept assai diagnosi	4
ranibizumab lucenti macular degener	4
hepatotox interferon-beta noni juic	4
pai perform commerci hmo	4
rifapentin treatment pulmonari tuberculosi	4
miltefosin children viscer leishmaniasi	4
hepatotox induc alendron therapi	4
hepatotox low-dos cyclophosphamid therapi	4
omeprazole-induc acut cholestat hepat	4
epidemiologi acut liver failur	4
acut pancreat amiodaron report	4
safeti consider niacin therapi	4
review articl drug hepatotox	4
nation survei physician-industri relationship	4
thalidomide-induc fulmin hepat failur	4
hepatotox caus green tea	4
spread obes social network	4
early-onset rhabdomyolysi relat daptomycin	4
thimeros exposur neuropsycholog outcom	4
alfuzosin-induc acut liver injuri	4
anabolic-androgen steroid liver injuri	4
atorvastatin safeti toler profil	4
manag emerg unconsci patient	4
quantit approach dialysi adequaci	4
diabet ey examin report	4
treatment strategi fibromyalgia syndrom	4
synovi sarcoma infratempor fossa	4
recycl plastic concret review	4
octreotid acetate-induc acut pancreat	4
metastat tumor uvea ey	4
wnt signal ovarian tumorigenesi	4
preoper manag pheochromocytoma patient	4
sever ticlopidine-induc cholestat syndrom	4
ezetimibe-associ advers effect clinician	4
telithromycin fda implic futur	4
hla-b5701 screen hypersensit abacavir	4
acut hepat associ paroxetin	4
tahitian noni juic hepatotox	4
liver affect alo vera	4
abacavir hypersensit reaction updat	4
late-onset celecoxib-induc combin hepato-nephrotox	4
vascular complianc cardiometabol syndrom	4
analysi gad65-gad65 autoantibodi interact	4
janu allopurinol-allopurinol hypersensit syndrom	4
hepatotox associ antiepilept drug	4
traumat hip disloc children	4
varicella-zost viru hepat polymyos	4
armodafinil treatment excess sleepi	4
acut hepatotox associ lamotrigin	4
tenofovir increas efavirenz hepatotox	4
natalizumab tysabri crohn diseas	4
sorafenib advanc hepatocellular carcinoma	4
effect clozapin psychoact drug	4
effect tibolon postmenopaus women	4
hereditari hemochromatosi post-hf era	4
exenatid weekli type diabet	4
halothan hepat iran review	4
system pilocarpin treatment xerostomia	4
acut hepat secondari bupropion	4
liver toxic tnfalpha antagonist	4
paroxetin safeti toler issu	4
phase studi 5-azacytidin nsc-102816	4
fulmin hepat induc lamotrigin	4
toxic hepat associ medroxyprogesteron	4
idh1 idh2 mutat glioma	4
nonsimultan extend altruistic-donor chain	4
giant primari liposarcoma chest	4
variabl popul meloidogyn arenaria	4
pediatr studi treprostinil overdos	4
electron health record hospit	4
histor perspect cadmium toxicologi	4
propylthiouracil-induc liver failur children	4
recent updat psychiatr condit	4
nebivolol third-gener beta-block hypertens	4
mutat tet2 myeloid cancer	4
canakinumab cryopyrin-associ period syndrom	4
role eszopiclon treatment insomnia	4
jaundic patient treat etanercept	4
solitari fibrou tumor pancrea	4
candesartan-induc cholestat hepat report	4
atenolol hepatotox report complic	4
hepat advers effect allopurinol	4
voriconazol pharmacokinet pharmacodynam children	4
pirfenidon idiopath pulmonari fibrosi	4
ciprofloxacin-induc acut cholestat hepat	4
genomewid associ studi leprosi	4
tolvaptan hyponatremia patient cirrhosi	4
hepatotox antibacteri pathomechan clinic	4
pioglitazon effect safeti profil	4
pitavastatin hmg-coa reductas inhibitor	4
iloperidon fanapt--anoth second-gener antipsychot	4
nationwid public-access defibril japan	4
rifaximin treatment hepat encephalopathi	4
preval diabet women china	4
lactic acidosi induc linezolid	4
acut treatment migrain headach	4
famciclovir focu efficaci safeti	4
cish suscept infecti diseas	4
cholestat sindrom due labetalol	4
velagluceras vpriv gaucher diseas	4
kava hepatotoxicity--a clinic review	4
placebo-control trial osteoporosis--proceed caution	4
denosumab prolia postmenopaus osteoporosi	4
toxicologi safeti comt inhibitor	4
drug femal sexual dysfunct	4
therapeut misadventur paracetamol children	4
acut hepat associ levofloxacin	4
treatment patient essenti tremor	4
hepatotox relat antirheumat drug	4
febuxostat treatment chronic gout	4
clinic experi daptomycin europ	4
drug safeti evalu exemestan	4
linezolid oxazolidinon antibacteri agent	4
linagliptin type diabet mellitu	4
drug-induc hepat due lenalidomid	4
alemtuzumab induct renal transplant	4
dress syndrom literatur review	4
uliprist acet emerg contracept	4
acut toxic ingest fluorid	4
ipilimumab yervoi metastat melanoma	4
cholestat hepat relat amoxicillin	4
efficaci safeti sustained-releas niacin	4
antituberculosi drug-induc hepatotox children	4
herbal medicin hepatotox revisit	4
cysteamin toxic patient cystinosi	4
cholestat hepat intraven ceftriaxon	4
monitor methotrex hepatotox psoriasi	4
rivaroxaban xarelto--a oral anticoagul	4
normal blood abnorm urin	4
iron acetaminophen fatal combin	4
vemurafenib zelboraf metastat melanoma	4
drug safeti evalu rosuvastatin	4
therapi cystic fibrosis--th begin	4
temozolomid induc liver injuri	4
hepat herbal remedi germand	4
diseas liver-an underappreci associ	4
acetylcystein therapi acetaminophen poison	4
drug inflammatori bowel diseas	4
clobazam onfi lennox-gastaut syndrom	4
diclofenac induc liver injuri	4
drug safeti evalu pregabalin	4
probabl celecoxib-induc hepatoren syndrom	4
cholestasi take anabol steroid	4
amoxicillin-clavulan acid hepatotox children	4
levofloxacin hepatotox risk diabet	4
glatiram acet induc hepatotox	4
toler hiv integras inhibitor	4
brief transderm rotigotin neupro	4
retroperiton solitari fibrou tumor	4
testosteron replac prostat cancer	4
develop formul sodium phenylbutyr	4
liposom bupivacain review formul	4
drug fatal involv kratom	4
celandin hepatotox clinic review	4
lomitapid homozyg famili hypercholesterolaemia	4
antirheumat drug risk hepatotox	4
statin reduc cancer-rel mortal	4
trem2 variant alzheim diseas	4
asenapin effect danger neurolept	4
massiv colchicin overdos recoveri	4
drug-induc liver injuri elderli	4
triptorelin manag prostat cancer	4
carfilzomib kryproli multipl myeloma	4
tofacitinib xeljanz rheumatoid arthriti	4
simulation-bas trial surgical-crisi checklist	4
liver toxic due olanzapin	4
hepat reactiv relat everolimu	4
caus acut hepat gemifloxacin	4
enzalutamid xtandi prostat cancer	4
budesonid uceri ulcer coliti	4
hepatox antiretrovir systemat review	4
drug homozyg famili hyperchelesterolemia	4
monetari cost dementia unit	4
hepatotox combin vemurafenib ipilimumab	4
catechin dietari supplement hepatotox	4
piper nigrum piperin updat	4
sesquiterpenoid herb leonuru japonicu	4
effect melatonin oxygen-depend process	4
manag pancreat neuroendocrin tumor	4
canaglifozin invokana type diabet	4
l-asparaginase-induc fulmin liver dysfunct	4
microbiota-liv axi hepat diseas	4
62-year-old painless jaundic hyponatremia	4
ipilimumab toxic multidisciplinari approach	4
ag age-rel diseas peroxisom	4
sever everolimus-induc steatohepati report	4
emerg treatment pemphigoid diseas	4
chromatin remodel polyamin analog	4
mulinan diterpenoid azorella compacta	4
non-id solut thermodynam cytoplasm	4
cardiovascular risk women pco	4
self-report wayfind abil driver	4
crofelem fulyzaq antiretroviral-induc diarrhea	4
albendazole-induc granulomat hepat report	4
liver injuri associ antidepress	4
efvftctdf-associ hepatotox report review	4
brief review experiment fluorosi	4
sexual coupl intimaci dementia	4
intern qualiti control practic	4
spinal epidur abscess brucellosi	4
hypofraction era modul radiotherapi	4
review tuberculosi focu bedaquilin	4
drug senegales school adolesc	4
evalu educ websit aid	4
weissella confusa septicemia foal	4
levomilnacipran fetzima snri depress	4
periop protocol colorect surgeri	4
antivir drug influenza 2013-2014	4
incid childhood obes unit	4
pcor years--progress lesson plan	4
riociguat adempa pulmonari hypertens	4
sglt inhibitor manag diabet	4
mutant zp1 famili infertil	4
integrin myofibroblast organ fibrosi	4
internet slim thyrotoxicosi liver	4
therapi hepat c--back futur	4
sofosbuvir ribavirin hcv genotyp	4
eslicarbazepin acet aptiom epilepsi	4
molecular vitro toxicologi fhnw	4
practic approach hip pain	4
nanotechnology-appli curcumin diseas therapi	4
mir-29 famili hematolog malign	4
molecular pathophysiologi portal hypertens	4
leptin defici maltreat children	4
empagliflozin treatment type diabet	4
cell-medi hypersensit reaction drug	4
cleft care intern adopt	4
drug idiopath pulmonari fibrosi	4
qualiti equiti care hospit	4
acetaminophen hepatotox updat review	4
evalu direct pcr amplif	4
surgic care health system	4
molecular genet basi depress	4
cell sarcoma kidnei report	4
mitochondri donation--how women benefit	4
primari renal carcinoid tumor	4
periprocedur manag rivaroxaban-tr patient	4
epilepsi malform cortic develop	4
aortic coarctat lifelong surveil	4
intellectu disabl epilepsi syndrom	4
ceftolozanetazobactam zerbaxa--a intraven antibiot	4
potenti fatal intox colchicin	4
recent advanc treatment hyperammonemia	4
easl recommend treatment hepat	4
ivabradin corlanor heart failur	4
ketamin phencyclidin bad unexpect	4
hcv target patient cirrhosi	4
mesalamine-induc fever remind prescrib	4
hepatotox oral anticoagul noac	4
amiodarone-induc liver injuri cirrhosi	4
anastrazole-rel drug-induc autoimmun hepat	4
popul landscap famili cancer	4
brexpiprazol rexulti schizophrenia depress	4
lenvatinib lenvima thyroid cancer	4
hla-dp express graft-versus-host diseas	4
role rolapit chemotherapy-induc emesi	4
palli care serious ill	4
panobinostat treatment multipl myeloma	4
naloxegol movantik opioid-induc constip	4
physician payment sgr--the meritocraci	4
sebelipas alfa global approv	4
doc nukes--stil live issu	4
mitotan revisit target drug	4
clinic practic postmenopaus osteoporosi	4
l-carnitin treatment pegasparaginase-induc hepatotox	4
isavuconazonium sulfat cresemba--a antifung	4
mifepriston mifeprex label chang	4
parp inhibitor ovarian cancer	4
nonalcohol steatohepat associ betaine-insuffici	4
fda approv antitoxin antibodi	4
nurs commun goal care	4
uveal schwannoma brown-ei dog	4
studi oper thorac trauma	4
rare manifest tuberculosi unit	4
sever hepatocytotox link denosumab	4
acut hepat dress syndrom	4
dysbindin-1 involv etiologi schizophrenia	4
role pim2 allerg asthma	4
hepat renal transplant patient	4
uncontrol bleed gastrointestin tract	4
nutrit supplement depress disord	4
approach hypoglycemia infant children	4
complet penil skin necrosi	4
hiv-associ cancer relat diseas	4
preoper antibiot wrist arthroscopi	4
paediatr cystolitholapaxi mitrofanoffmonti channel	4
prostate-specif antigen flare induc	4
non-invas ventil cerebr palsi	4
role basophil chronic itch	4
irrit bowel syndrom dog	4
prostaglandin pathogenesi kidnei diseas	4
phenotyp analys il-10-produc foxp3	4
primari neurolymphomatosi trigemin nerv	4
therapeut strategi eosinophil dermatos	4
system sarcoidosi associ exposur	4
confront challeng menopaus transit	4
exercis pregnant women diabet	4
children hospit uniqu essenti	4
pyoderma gangrenosum hand surgeri	4
urinari biomark renal fibrosi	4
bile duct-on-a-chip organ-level function	4
spread sars-cov-2 iceland popul	4
evinacumab homozyg famili hypercholesterolemia	4
manpow polici primari health care	5
granulomat hepat associ salicylazosulfapyridin therapi	5
azulfidin sulfasalazine- induc hepat injuri	5
hepatotox salicylazosulfapyridin report review literatur	5
hypersensit reaction sulfasalazin sever hepatotox	5
letter hepatoma associ androgen steroid	5
letter oral contracept malign hepatoma	5
discoveri clinic effect bleomycin develop	5
immunosuppress cytotox chemotherapi long-term complic	5
hepat sinusoid dilat chenodeoxycholic-acid therapi	5
develop antinuclear antibodi acebutolol therapi	5
evalu medic practic technologi assess	5
advers reaction methyldopa--a decad report	5
cholestat hepat administr furan deriv	5
penicillamin rheumatoid arthriti advers effect	5
parthenogen origin benign ovarian teratoma	5
hepat dysfunct recipi renal allograft	5
liver-cel adenoma associ oral contracept	5
success treatment malign gastrinoma streptozotocin	5
editori system contracept liver tumor	5
hepat adenoma observ estrogen withdraw	5
famili hyperglucagonemia--an autosom domin disord	5
hepat tumor relationship oral contracept	5
cluster epstein-barr-virus-associ american burkitt lymphoma	5
hepatoma child methotrexate-induc hepat fibrosi	5
treatment cush diseas opddd survei	5
anabol steroid therapi intrahepat cholangiocarcinoma	5
bone resorpt chronic otiti media	5
transor resect condylar osteochondroma report	5
hepatotox treatment acut lymphoblast leukaemia	5
natur incid unwant effect atenolol	5
complic chrysotherapi review recent studi	5
hepat toxic associ gold therapi	5
colorect polyp dog clinicopatholog studi	5
quantum fluctuat radiograph screen-film system	5
lack evid cancer due metronidazol	5
antimicrobi drug hospit pattern prophylaxi	5
vitro technic studi drug-induc pancytopenia	5
noncirrhot portal hypertens arsen ingest	5
desmosom abnorm liver methotrexate-tr psoriat	5
studi ill referr spanish-speak commun	5
adenin metabol intraven peror administr	5
comparison antitumour activ glucan parvum	5
frequenc sexual dysfunct normal coupl	5
associ granulomat hepat clofibr therapi	5
intrahepat jaundic due warfarin therapi	5
liver function children receiv carbamazepin	5
neglig hepatotox chlorpromazin long-term therapi	5
liver toxic follow cis-dichlorodiammineplatinumii treatment	5
sever reaction associ sulindac administr	5
foreign medic graduat maryland medicaid	5
aspirin hepatotox dissemin intravascular coagul	5
close monitor essenti isoniazid prophylaxi	5
phenytoin-induc pseudolymphoma syndrom immunolog studi	5
safeti valu naloxon therapeut aid	5
black under-represent unit medic school	5
allopurinol hepatotox report literatur review	5
liver lesion oral contracept steroid	5
letter death cupric sulfat emet	5
leprosi unit 1950-1969 epidemiolog review	5
aspirin hepatotox adult rheumatoid arthriti	5
intrauterin devic death spontan abort	5
gonadoblastoma clinicopatholog correl six patient	5
spectrum myopathi citi sم£o paulo	5
crystallin 3-phospho-d-glycer kinas hors muscl	5
immunocytolog loss isoantigen endometrium brain	5
vater vacterl syndrom author transl	5
respons chemotherapi detect puls cytophotometri	5
platelet densiti size interpret heterogen	5
4-alkyldihydroflavin coenzym synthesi modif flavodoxin	5
incid epistaxi racehors south africa	5
structure-funct activ azasterol nitrogen-contain steroid	5
radiolog method studi pancreat arteri	5
poros bone cement author transl	5
assess blood pressur framingham studi	5
metabol disord chronic circulatori insuffici	5
statu clinic neurologi japan polyradiculoneuopathi	5
techniqu clinic hygien 3-3 retain	5
suppress lymphocyt transform aspirin ingest	5
ineffect hemodialysi copper sulphat poison	5
liver damag follow salicyl intak	5
trend surviv rate patient cancer	5
editori oral contracept myocardi infarct	5
metrolog basi optim radiometri bodi	5
pathogenesi surgic tactic pancreat cyst	5
right health care--beyond equiti effici	5
effect somatostatin coagul platelet function	5
halothane-rel hepat clinic studi twenty-six	5
dialysi encephalopathi syndrom aluminum intox	5
letter salicyl hepatotox reiter syndrom	5
clinicopatholog confer multipl myeloma follow	5
quinidin hepatotox report review literatur	5
[truncated: 12,160 more rows]

## Sheet: CAMDA_Histogram
Bin	Frequency	Cumulative %	Bin	Frequency	Cumulative %
1	45	0.00317819	7	1695	0.119712
2	258	0.0213998	6	1506	0.226075
3	605	0.0641288	8	1506	0.332439
4	999	0.134685	9	1420	0.432728
5	1329	0.228547	5	1329	0.526591
6	1506	0.334911	10	1240	0.614168
7	1695	0.454623	11	1033	0.687125
8	1506	0.560986	4	999	0.757681
9	1420	0.661276	12	755	0.811004
10	1240	0.748852	3	605	0.853733
11	1033	0.821809	13	582	0.894837
12	755	0.875132	14	406	0.923512
13	582	0.916237	15	278	0.943146
14	406	0.944911	2	258	0.961367
15	278	0.964546	16	183	0.974292
16	183	0.97747	17	119	0.982697
17	119	0.985875	18	75	0.987994
18	75	0.991172	1	45	0.991172
19	44	0.994279	19	44	0.994279
20	31	0.996469	20	31	0.996469
21	21	0.997952	21	21	0.997952
22	13	0.99887	22	13	0.99887
23	4	0.999152	24	6	0.999294
24	6	0.999576	23	4	0.999576
25	1	0.999647	29	2	0.999717
26	1	0.999717	25	1	0.999788
27	1	0.999788	26	1	0.999859
28	1	0.999859	27	1	0.999929
29	2	1	28	1	1
More	0	1	More	0	1

## Sheet: CAMDA_Descriptive_Statistics
Descriptive Statistics (CAMDA Dataset)
Mean	8.32495
Standard Error	0.0300285
Median	8
Mode	7
Standard Deviation	3.57314
Sample Variance	12.7673
Kurtosis	0.689045
Skewness	0.67807
Range	28
Minimum	1
Maximum	29
Sum	117873
Count	14159
Largest(1)	29
Smallest(1)	1
Confidence Level(95.0%)	0.0588598

## Sheet: titles_arXiv
Preprocessed Titles (arXiv Dataset)	# of words
transform	1
segment	1
r-cnn	1
meta-curvatur	1
attent	1
mirror	1
t-learn	1
epoch	1
eigennetwork	1
panopt segment	2
flood-fil network	2
neutro-connected cut	2
superpixel hierarchi	2
pretrain encod	2
curriculum deepsdf	2
benign overfit	2
conscious prior	2
fast adapt	2
causal regular	2
unsupervis despeckl	2
instanc queri	2
track object	2
auto-context r-cnn	2
kernel cross-correl	2
mask r-cnn	2
fast r-cnn	2
detect propos	2
transfer learn	2
talking-head attent	2
learn transfer	2
deep identif	2
think transform	2
orbit mcmc	2
properti kernel	2
sequenc parallel	2
transform track	2
attent normal	2
mixup regular	2
invis cloak	2
test-tim augment	2
linear transform	2
attent explain	2
memori graph	2
program reward	2
deep forest	2
kendal transform	2
gaussian transform	2
adapt transform	2
insertion-delet transform	2
multi-dimension scale	2
cumul gan	2
softmax gan	2
s-flow gan	2
gan wgan	2
implicit autoencod	2
cloud gan	2
gan q-learn	2
fisher gan	2
pixelgan autoencod	2
adversari autoencod	2
model compress	2
survei transform	2
learn retrospect	2
adversari gain	2
memgen memori	2
tour tensorflow	2
function bandit	2
learn collabor	2
mesh graphorm	2
put rdf2vec	2
quantiz gromov-wasserstein	2
auto-decod graph	2
eigen-stratifi model	2
mesh r-cnn	2
semantic-driven color	2
time-travel rephotographi	2
window filter	2
co-occurr filter	2
color homographi	2
deep color	2
map convolut	2
plai depth	2
waterdrop stereo	2
pointnetlk revisit	2
learn sampl	2
pair featur	2
binari signatur	2
graph backdoor	2
supervis blockmodel	2
track reconstruct	2
defens osvo	2
learn demonstr	2
mixup hesit	2
diversity-enrich option-crit	2
reinforc learn	2
dynamics-awar embed	2
reward-condit polici	2
event-driven model	2
introspect learn	2
reinforc learn	2
learn teach	2
boltzmann explor	2
concret dropout	2
learn reinforc	2
explor potenti	2
learn optim	2
openai gym	2
polici distil	2
perception-distort tradeoff	2
low-resolut recognit	2
super-resolut grid	2
video imprint	2
fine-grain re-identif	2
iter 3-transform	2
regular attent	2
self-correct q-learn	2
attent activ	2
cross-conform e-predict	2
fast r-cnn	2
agglom attent	2
music transform	2
trust classifi	2
theori bart	2
video re-loc	2
imag transform	2
autoregress model	2
inform siev	2
relat explan	2
standard explain	2
explain recognit	2
logic scaffold	2
patch learn	2
explan specif	2
analyz cart	2
meticul object segment	3
semi-supervis image-to-imag translat	3
facad segment wild	3
uniform inform segment	3
select imag super-resolut	3
learn represent human	3
adversari graph disentangl	3
differenti frã©chet mean	3
privileg zero-shot automl	3
distribution-depend analysi meta-learn	3
fair normal flow	3
self-damag contrast learn	3
person pre-train model	3
cocon cooperative-contrast learn	3
cloud learn transform	3
self-supervis classif network	3
compos gener model	3
odd-one-out represent learn	3
telescop density-ratio estim	3
disentangl subspac diffus	3
lattic represent learn	3
uniqu recognit video	3
graph transform network	3
represent learn multiset	3
function-spac distribut kernel	3
multilingu factor analysi	3
represent learn demonstr	3
domain-adversari network align	3
learnabl inform bottleneck	3
refer product search	3
amort infer regular	3
multi-task graph autoencod	3
represent learn rotat	3
variat wasserstein cluster	3
holograph neural architectur	3
mix link network	3
learn less-overlap represent	3
represent learn count	3
inform potenti auto-encod	3
represent learn data	3
limit end-to-end learn	3
deep residu hash	3
variat gaussian process	3
latent-observ dissimilar measur	3
schedul denois autoencod	3
domain-adversari neural network	3
distribut decis tree	3
learn unbias featur	3
autoregress score match	3
spars sinkhorn attent	3
subspac capsul network	3
variat f-diverg minim	3
geometr imag synthesi	3
adversari feedback loop	3
gener adversari network	3
gener multi-adversari network	3
interact illumin invari	3
visual salienc transform	3
pnp-3d plug-and-plai cloud	3
conceal object detect	3
zero-shot instanc segment	3
yolo5fac reinvent detector	3
iwildcam competit dataset	3
salient object clutter	3
activ learn custom	3
self-supervis model transfer	3
studi obfusc imagenet	3
swa object detect	3
simpl multi-dataset detect	3
detect invis peopl	3
copyspac write imag	3
geography-awar self-supervis learn	3
object-cent imag stitch	3
object detect positive-unlabel	3
overview object detect	3
cross-mod object detect	3
prime-awar adapt distil	3
featur pyramid transform	3
cross-supervis object detect	3
featur pyramid grid	3
multi-wai encod robust	3
gridmask data augment	3
panopt edg detect	3
runtime-throttl neural network	3
accur detect perform	3
object detect survei	3
augment object detect	3
partially-supervis imag caption	3
rethink imagenet pre-train	3
multi-view x-rai r-cnn	3
object detect frame	3
non-loc neural network	3
object-bas reason vqa	3
detect sign imag	3
deform convolut network	3
learn non-maximum suppress	3
salient object subit	3
convolut color constanc	3
hold convnet detect	3
max-margin object detect	3
simultan detect segment	3
boost locat space	3
learn bound open-set	3
adapt transfer learn	3
gener transfer learn	3
filter manifold align	3
limit transfer learn	3
multiresolut convolut autoencod	3
continu learn hypernetwork	3
learn task domain	3
micro-attent micro-express recognit	3
anomali detect imag	3
zero-shot task transfer	3
deep depth color	3
increment sequenc learn	3
web-scal train identif	3
meg decod subject	3
machine-learn hidden symmetri	3
imag fusion transform	3
learn compat embed	3
discret denois flow	3
semi-spars smooth filter	3
deep quantil aggreg	3
relat transform network	3
parametr scatter network	3
differenti draw sketch	3
convolut help transform	3
moment mmd compar	3
object detect pointform	3
aggreg nest transform	3
kernel identif transform	3
gener archimedean copula	3
pct cloud transform	3
glance-and-gaz vision transform	3
fair represent compress	3
transform grand vitess	3
pai attent requir	3
neural algorithm reason	3
stabl view synthesi	3
deeper imag transform	3
convex nonparanorm regress	3
meta-learn symmetri reparameter	3
spatial transform cloud	3
high-fidel arbitrari edit	3
b-spline cnn lie	3
implicit normal flow	3
look one-level featur	3
rethink attent perform	3
implicit kernel attent	3
graphic normal flow	3
stein neural sampler	3
fourier loss function	3
gan steerabl optim	3
learn attribute-miss graph	3
stochast normal flow	3
invers learn symmetri	3
affine-invari robust train	3
imag caption transform	3
volumetr transform network	3
haar graph pool	3
fast coher drift	3
proposition embed coin	3
equivari entity-relationship network	3
repres dataset perceptron	3
applic registr uncertainti	3
represent rã©nyi heterogen	3
unsupervis sketch-to-photo synthesi	3
molecul attent transform	3
reform effici transform	3
survei graph kernel	3
recurr transform learn	3
transform subspac cluster	3
attent rout capsul	3
introduct variat infer	3
disentangl lifespan synthesi	3
tame gan lookahead-minmax	3
intrins dimens estim	3
graphattack multi-task framework	3
hallucin finish touch	3
gan-bas semi-supervis learn	3
dual-refer ag synthesi	3
gan nash equilibria	3
progress augment gan	3
advfac adversari synthesi	3
implicit kernel learn	3
mri translat gan	3
adversari set registr	3
wasserstein diverg gan	3
adversari regular autoencod	3
deep graph translat	3
tensori mixtur model	3
theoret properti gan	3
regular wasserstein gan	3
adversari dropout regular	3
novelti detect gan	3
train gan optim	3
adversari network embed	3
gener adversari parallel	3
learn drive simul	3
inform theoretic-learn auto-encod	3
gener adversari network	3
knowledg distil survei	3
condit teacher-stud learn	3
improv bayesian compress	3
ternari weight network	3
distil model knowledg	3
divers machin learn	3
diagnost semant segment	3
fully-train deep match	3
semant segment supervis	3
hierarch piecewise-const super-region	3
identif second-ord pool	3
template-bas activ contour	3
unsupervis spectral learn	3
panopt narr ground	3
zero-shot recommend system	3
short-term memori rnn	3
account error character	3
survei curriculum learn	3
structur neural summar	3
imit interact intellig	3
depth-to-width interplai self-attent	3
spectral underpin word2vec	3
deep latent defenc	3
sum-product network survei	3
deep set gener	3
natur alpha embed	3
deep leakag gradient	3
crowd video caption	3
cooper imag caption	3
wasserstein-fisher-rao document distanc	3
recurr attent unit	3
dropfilt dropout convolut	3
deep reinforc learn	3
control gener text	3
corpu replic task	3
structur optim transport	3
self-norm neural network	3
learn superoptim program	3
dense-capt event video	3
neural semant encod	3
distribut tree kernel	3
proven graph kernel	3
multiscal laplacian learn	3
learn maxim influenc	3
discrete-valu neural commun	3
evolving-graph gaussian process	3
max-margin dead live	3
attent graph network	3
persist messag pass	3
semi-supervis graph-to-graph translat	3
neural network semigroup	3
graph forc learn	3
graph-bas continu learn	3
learn graph represent	3
multi-graph tensor network	3
ultrahyperbol represent learn	3
graph-revis convolut network	3
simplici neural network	3
sheaf neural network	3
learn design circuit	3
robust imag caption	3
graph attent track	3
subgraph neural network	3
graph inform bottleneck	3
factor graph grammar	3
continuous-in-depth neural network	3
graph homomorph convolut	3
self-attent associ memori	3
memory-bas graph network	3
causal bayesian optim	3
correl variat auto-encod	3
graph highwai network	3
heterogen graph transform	3
hebbian graph embed	3
indian chef process	3
museum paint retriev	3
deep imag composit	3
concept bottleneck model	3
styliz neural paint	3
continu color transfer	3
semant view synthesi	3
probabilist fair cluster	3
deep white-bal edit	3
vehicl drive assist	3
dual swap disentangl	3
predict correl featur	3
find grai pixel	3
steady-st non-line-of-sight imag	3
depth coeffici complet	3
learn domain modal	3
texture-awar superpixel segment	3
pixel semant color	3
locat augment cnn	3
multiband sa imageri	3
semant single-imag dehaz	3
probabilist imag color	3
video propag network	3
color constanc deriv	3
search scene abstract	3
color homographi correct	3
outlier-robust convex segment	3
peopl scene probe	3
learn synthet human	3
surfac normal wild	3
coupl depth learn	3
image-bas align scan	3
emb geometr perceptron	3
view-guid cloud complet	3
flow-bas anomali detect	3
correspond matric underr	3
spatial transform convolut	3
cross-mod center loss	3
convolut occup network	3
3dn deform network	3
g2d gta data	3
density-bas denois cloud	3
lifelong graph learn	3
graph filtrat learn	3
densiti graph kernel	3
tensor regress network	3
self-attent graph pool	3
partial complet question	3
lovasz convolut network	3
deep graph infomax	3
approxim random dropout	3
graph diffusion-embed network	3
logist network lasso	3
anonym walk embed	3
graph attent network	3
variat graph auto-encod	3
video super-resolut transform	3
deep frame interpol	3
video acceler magnif	3
egocentr height estim	3
few-shot quality-divers optimis	3
physics-bas deep learn	3
robust predict control	3
parameter-bas valu function	3
fair counterfactu util	3
offlin off-polici evalu	3
model-agnost learn meta-learn	3
solv machin learn	3
temporl learn act	3
visual muzero model	3
go-explor approach hard-explor	3
task-agnost morphologi evolut	3
recurr ration network	3
adversari guid actor-crit	3
geometr entrop explor	3
self-imit advantag learn	3
opac opportunist actor-crit	3
nethack learn environ	3
feder knowledg distil	3
debias contrast learn	3
adapt reward-fre explor	3
deep constrain q-learn	3
critic regular regress	3
rank polici decis	3
interact visual debug	3
asynchron coagent network	3
plan expect model	3
tutori thompson sampl	3
deep coordin graph	3
dual polici distil	3
temporally-extend îµ-greedi explor	3
extra transfer-guid explor	3
interact differenti simul	3
intrins explor multi-object	3
multi-path polici optim	3
hamiltonian gener network	3
gener speedi q-learn	3
bottom-up meta-polici search	3
starcraft multi-ag challeng	3
alignment-bas imit learn	3
gener explor exploit	3
worst polici gradient	3
positive-unlabel reward learn	3
explor optimist actor-crit	3
gener off-polici actor-crit	3
multi-view reinforc learn	3
influence-bas multi-ag explor	3
third-person imit learn	3
logic -simplici transform	3
reinforc learn applic	3
grow action space	3
success relax q-learn	3
recurr valu function	3
stochast lipschitz q-learn	3
prefer implicit world	3
learn design rna	3
logically-constrain reinforc learn	3
stochast reinforc learn	3
learn navig web	3
multimod model-agnost meta-learn	3
natur option critic	3
q-learn nearest neighbor	3
inspir learn prefer	3
q-learn provabl effici	3
many-go reinforc learn	3
memori augment self-plai	3
fourier polici gradient	3
evolv polici gradient	3
hindsight experi replai	3
implement deep q-network	3
introduct industri benchmark	3
observ learn reinforc	3
constrain polici optim	3
particl valu function	3
neural episod control	3
variat intrins control	3
quantil reinforc learn	3
progress neural network	3
learn valu magnitud	3
model-fre episod control	3
activ inform acquisit	3
distribut deep q-learn	3
risk-sensit reinforc learn	3
kalman tempor differ	3
sample-complex reinforc learn	3
pac-bayesian inequ martingal	3
fraction moment bandit	3
deep burst super-resolut	3
photometr depth super-resolut	3
deep multi-fram super-resolut	3
super-resolut wasserstein gan	3
multi-cent feder learn	3
iter graph self-distil	3
attent survei model	3
group-structur adversari train	3
relax local robust	3
pac-learn strateg classif	3
local hyper-flow diffus	3
semant correspond transform	3
audiovisu video summar	3
graph learn survei	3
adapt submodular meta-learn	3
dynam slimmabl network	3
hyperbol neural network	3
privacy-preserv object detect	3
name tensor notat	3
causal autoregress flow	3
classif abstent dispar	3
learn similarity-confid data	3
diagnost caption survei	3
morphologi categor distribut	3
gradient-induc co-sali detect	3
forgeri detect decomposit	3
detect digit manipul	3
bayesian attent modul	3
learn incentiv agent	3
discern imag compress	3
reference-guid compon edit	3
fine-grain crowd count	3
retinamask mask detector	3
trust addit explan	3
reservoir memori machin	3
semantic-awar scene recognit	3
human-awar motion deblur	3
attention-awar answer crowd	3
learn optim swarm	3
multi-margin wasserstein gan	3
attent neural process	3
audio-visu kinship verif	3
benchmark minimax linkag	3
graph attent auto-encod	3
graph kernel survei	3
pluralist imag complet	3
crowd transform network	3
stabil interpret model	3
fully-featur attribut transfer	3
robust perform detector	3
troi attent salienc	3
person salienc predict	3
neural replic dynam	3
logic explain network	3
weakly-supervis onlin hash	3
infonc variat autoencod	3
functori manifold learn	3
tutori variat autoencod	3
neural empir bay	3
variat learn disentanglement-pytorch	3
univers person re-identif	3
unsupervis deep track	3
inform theoret co-train	3
dimension reduct ensembl	3
multi-task sequenc learn	3
stack what-wher auto-encod	3
canon autocorrel analysi	3
deep learn scatter	3
local compon analysi	3
learn low-dens separ	3
neural od process	3
gener fairness-preserv explan	3
un-avoid adversari exampl	3
local explan model	3
ration shaplei valu	3
character risk fairwash	3
explan monoton classifi	3
biometr trust verifi	3
probabilist suffici explan	3
adversari inform bottleneck	3
price explain cluster	3
relat boost bandit	3
reflective-net learn explan	3
interpret model ann	3
framework attribut robust	3
extend isol forest	3
psychfm predict gambl	3
flat fals friend	3
smooth stabil gan	3
lstm unfulfil promis	3
coverage-bas outlier explan	3
identifi explain classifi	3
attribut express dcnn	3
non-linear bellman equat	3
decoupl gate linear	3
bound queri learn	3
hyper-paramet sweep alphazero	3
stabl recurr model	3
stochast gradient algorithm	3
joint random forest	3
spars learn cart	3
adapt bayesian reticulum	3
learn tune xgboost	3
interpret accur model	3
employe attrit predict	3
acceler gradient boost	3
random forest data	3
neural decis tree	3
measur qualiti exercis	3
reinforc decis tree	3
distribution-specif agnost boost	3
neural forecast scale	3
short-term cognit network	3
gener reservoir comput	3
low rank forecast	3
liquid time-const network	3
variat dynam mixtur	3
forecast multipl season	3
hide-and-seek privaci challeng	3
lstm-base flow predict	3
attend emot narr	3
deep factor forecast	3
time seri imput	3
non-stationari spectral kernel	3
independ cluster matrix	3
diseas trajectori map	3
variat recurr auto-encod	3
fast function regress	3
invari factor time-seri	3
time-seri scenario forecast	3
auto-encod molecular conform	3
graph deconvolut gener	3
smile variat autoencod	3
person imag semant segment	4
learn pai attent mistak	4
partli supervis multitask learn	4
automat imag co-segment survei	4
topologi maintain structur encod	4
iri recognit ey pathologi	4
segment brain tumor symmetri	4
neural network topologi optim	4
nighttim skycloud imag segment	4
planecel repres space plane	4
weakli supervis learn afford	4
salienc map imag hierarchi	4
kernel spectral cluster applic	4
live-wir medic imag segment	4
large-margin metric learn partit	4
stabl segment digit imag	4
hyperparameter-fre explain graph embed	4
sketch time-depend machin learn	4
principl deep learn theori	4
learn self-consist deepfak detect	4
reinforc learn prototyp represent	4
contrast multimod fusion tupleinfonc	4
pointin point-bas instanc segment	4
edg represent learn hypergraph	4
graph mixtur densiti network	4
self-supervis longitudin neighbourhood embed	4
prototyp graph contrast learn	4
model select bayesian autoencod	4
cross-mod discret represent learn	4
fairness-awar node represent learn	4
independ mechan analysi concept	4
multiresolut graph variat autoencod	4
deep fair discrimin cluster	4
membership-map data represent learn	4
generaliz reinforc learn tractabl	4
imposs theorem node embed	4
grade graph dynam embed	4
fine-tun allow effect meta-learn	4
deep cluster measur propag	4
auto-weight low-rank represent cluster	4
contrast code represent learn	4
spars graph attent network	4
depth attent represent learn	4
learn align video time	4
scale visual food recognit	4
categor represent learn morphism	4
condit meta-learn linear represent	4
self-supervis learn multi-view perspect	4
self-supervis learn gener contrast	4
latent represent predict network	4
variable-r discret represent learn	4
nearest neighbor search uncertainti	4
toward backward-compat represent learn	4
deep graph gener survei	4
sign graph diffus network	4
deep fusion cluster network	4
group-connect multilay perceptron network	4
heterogen deep graph infomax	4
mix consist deep cluster	4
feder unsupervis represent learn	4
long-term cloth-chang person re-identif	4
select cascad residu extratre	4
div2vec diversity-emphas node embed	4
discrimin distil represent learn	4
autoregress unsupervis imag segment	4
linear identifi learn represent	4
insight futur continu learn	4
graph entiti step mixtur	4
controlva control variat autoencod	4
learn smooth fair represent	4
interpret contrast learn network	4
depthwis discret represent learn	4
disassembl object represent label	4
neural attent multiview machin	4
adapt cross-mod few-shot learn	4
structur deep cluster network	4
graph neighborhood attent pool	4
represent learn medic data	4
deep audio-visu learn survei	4
unsupervis model-fre represent learn	4
invari represent adversari train	4
represent learn statist perspect	4
exponenti famili graph embed	4
video enhanc task-ori flow	4
neural multisensori scene infer	4
quaternion knowledg graph embed	4
learn paradigm travel salesman	4
practic consist estim f-diverg	4
triplet-awar scene graph embed	4
tuning-fre disentangl via project	4
neural predict belief represent	4
graph convolut network eigenpool	4
multimod classif urban micro-ev	4
cross learn cross-mod self-supervis	4
measur composition represent learn	4
hierarch cluster represent learn	4
disentangl represent learn shape	4
represent learn spatial graph	4
complex explor goal-driven navig	4
visual understand sum-product network	4
learn predict graph autoencod	4
unpair photo-to-caricatur translat wild	4
learn represent counterfactu infer	4
neural discret represent learn	4
auto-encod total correl explan	4
domain-adapt deep network compress	4
learn represent automat color	4
pars via recurr propag	4
provabl benefit represent learn	4
featur incai represent regular	4
deeppermnet visual permut learn	4
dataset augment featur space	4
robust lstm-autoencod de-occlus wild	4
sequenti cost-sensit featur acquisit	4
domain-adversari train neural network	4
nonparametr canon correl analysi	4
disentangl represent neural model	4
represent learn review perspect	4
meta-learn diverg variat infer	4
improv transform high-resolut gan	4
inter-class discrep align recognit	4
adversari text-to-imag synthesi review	4
gener energi base model	4
attribute-guid imag gener layout	4
lifespan ag transform synthesi	4
repos human warp featur	4
gener adversari data program	4
cycl text-to-imag gan bert	4
twin auxiliari classifi gan	4
student t-gener adversari network	4
industri smoke detect visual	4
improv train curriculum gan	4
unbias imag style transfer	4
mask-awar photorealist attribut manipul	4
guid interact deep network	4
high-dynamic-rang imag cloud segment	4
squar gener adversari network	4
adversari train sketch retriev	4
pseudo-lidar monocular object detect	4
orient r-cnn object detect	4
baod budget-awar object detect	4
invert understand object detector	4
obstacl detect bvlo drone	4
salvag supervis weakli detect	4
orient object detect transform	4
self-supervis learn swin transform	4
contnet convolut transform time	4
boundary-awar object detect cloud	4
instanc distil object detect	4
survei contrast self-supervis learn	4
res2net multi-scal backbon architectur	4
machin learn limit data	4
center-bas object detect track	4
deep visual domain adapt	4
flaa feder learn servic	4
perceiv traffic aerial imag	4
determinant process altern nm	4
contextu divers activ learn	4
repres graph neural network	4
viprior object detect challeng	4
self-supervis approach adversari robust	4
depth salient object detect	4
end-to-end object detect transform	4
person re-identif aerial imageri	4
feature-driven super-resolut object detect	4
increment few-shot object detect	4
imbal object detect review	4
progress object transfer detect	4
anim detect man-mad environ	4
mean guid video caption	4
wsod psnet box regress	4
caraf content-awar reassembli featur	4
imag caption unseen object	4
disentangl monocular object detect	4
patchfcn intracrani hemorrhag detect	4
vehicl imag gener surround	4
road user detect video	4
featur intertwin object detect	4
focal loss object detect	4
pneumonia detect chest radiograph	4
object localis motion constraint	4
glioma segment cascad unet	4
temporal-spati map action recognit	4
semi-convolut oper instanc segment	4
context propos salienc detect	4
object detect equirectangular panorama	4
vision meet drone challeng	4
salient object detect benchmark	4
vehicl detect aerial imag	4
spot differ object detect	4
person action-object detect egonet	4
detect peopl artwork cnn	4
latent model ensembl auto-loc	4
deep retin imag understand	4
seq-nm video object detect	4
classif leverag object detector	4
object-propos evalu protocol gameabl	4
learn segment object candid	4
make effect detect propos	4
mid-level element object detect	4
object class detect wild	4
local decorrel improv detect	4
1-hkust object detect ilsvrc	4
detect partial visibl object	4
object detect us keygraph	4
stochast grammar natur shape	4
object detect real imag	4
recogn licens plate real-tim	4
system theori transfer learn	4
robust gener nearest categori	4
multir train neural network	4
frustratingli easi transfer estim	4
identifi misinform websit screenshot	4
concis review transfer learn	4
scalabl causal transfer learn	4
transform deep neural network	4
learn dynamic-awar embed transfer	4
coconet collabor convolut network	4
relat gener few-shot learn	4
learn local action moment	4
foliat view transfer learn	4
knowledg distil meet self-supervis	4
robustifi sequenti neural process	4
conceptu framework lifelong learn	4
heterogen represent learn review	4
transfer valu iter network	4
semi few-shot attribut translat	4
character avoid neg transfer	4
aesthet attribut assess imag	4
imaterialist fashion attribut dataset	4
stabil graph scatter transform	4
dynam reachabl learn task	4
consid race transfer learn	4
polici transfer strategi optim	4
correspond project orphan screen	4
deep reinforc learn overview	4
instance-bas deep transfer learn	4
survei deep transfer learn	4
uncertainti multitask transfer learn	4
toward reliabl transfer learn	4
deep featur learn graph	4
shapechang environ transfer learn	4
aga attribut guid augment	4
deep learning-bas commun air	4
transfer hash privileg inform	4
templat adapt verif identif	4
transfer prototype-bas fuzzi cluster	4
hmax llc visual recognit	4
constrain spectral cluster applic	4
introduct neural network verif	4
ghostshiftaddnet featur energy-effici oper	4
spars factor squar matric	4
learn styliz novel view	4
visual label mixed-featur dataset	4
block prune faster transform	4
inpaint transform anomali detect	4
neural human deform transfer	4
deep signatur fbsde algorithm	4
neural articul radianc field	4
toward data-driven filter paraview	4
minivlm faster vision-languag model	4
dual-stream network visual recognit	4
brownian motion transform model	4
local-to-glob self-attent vision transform	4
squar normal cross correl	4
imag similar dataset challeng	4
post-train quantiz vision transform	4
toward long-form video understand	4
causal view composit data	4
transform import applic cosmologi	4
equivari network pixel sphere	4
neural symbol regress scale	4
mltr multi-label classif transform	4
hybrid generative-contrast represent learn	4
space-tim attent video understand	4
transform model physic system	4
express power self-attent matric	4
deep learn statist arbitrag	4
refin self-attent vision transform	4
pai attent vision transform	4
churn reduct via distil	4
contain context aggreg network	4
symmetry-driven graph neural network	4
unsupervis perform analysi align	4
label classifi accuraci evalu	4
boost crowd count transform	4
graph featur gate network	4
vidtr video transform convolut	4
learn cluster via transform	4
lorentzian graph convolut network	4
pose recognit cascad transform	4
tuber tube-transform action detect	4
transfer reason pattern vqa	4
unconstrain monoton neural network	4
asymmetr cnn imag super-resolut	4
vivit video vision transform	4
capsul network robust convolut	4
recurr vision-and-languag bert navig	4
learn placehold open-set recognit	4
interpret approxim high-dimension data	4
infer gener capsul model	4
comprehens survei cloud registr	4
condit sampl monoton gan	4
detr crowd pedestrian detect	4
equivari condit neural process	4
delight deep light-weight transform	4
improv anti-spoof virtual synthesi	4
iconograph imag caption artwork	4
identity-awar graph neural network	4
classif model partial sequenc	4
ukpgan unsupervis keypoint ganer	4
gener transform network graph	4
entangl kernel beyond separ	4
sub-linear memori perform slim	4
few-shot sequenc learn transform	4
robust princip compon regress	4
e3d event-bas shape reconstruct	4
ffd fast featur detector	4
hyperparamet optim reinforc transform	4
geometr scatter attent network	4
meta-registr learn registr cloud	4
adapt geo-topolog independ criterion	4
local interact instanc segment	4
hard shape-constrain kernel machin	4
hypernetwork approach gener cloud	4
few-shot learn opinion summar	4
signatur featur visibl transform	4
unsupervis hierarch concept learn	4
subspac embed nonlinear transform	4
spars quantiz spectral cluster	4
understand difficulti train transform	4
fast real-tim counterfactu explan	4
fast partial fourier transform	4
identity-awar multi-sent video descript	4
overview neural network compress	4
multi-nod bert-pretrain cost-effici approach	4
lagrangian dualiti reinforc learn	4
multi-mod transform video retriev	4
spectral-gan high-resolut point-cloud gener	4
layer normal transform architectur	4
record fusion learn approach	4
anomali detect tensor network	4
adapt mesh video stabil	4
tree-bas dictionari learn framework	4
compute-bound low-bandwidth distribut graph-slam	4
normal attent probabl cage	4
mcmc assist belief propag	4
complex amplitude-phas boltzmann machin	4
robust certif gener model	4
local model featur transform	4
topologi deep neural network	4
secur risk cancel biometr	4
understand spars featur hash	4
ghostnet featur cheap oper	4
represent learn latent canonic	4
feasibl action counterfactu explan	4
tree-structur attent hierarch accumul	4
differenti blackbox combinatori solver	4
suffici represent categor variabl	4
glu variant improv transform	4
bayesian semi-supervis learn nonparanorm	4
graph-fcn imag semant segment	4
hyperbol graph attent network	4
dual affin moment invari	4
attent abstract visual reason	4
transport model featur extract	4
visual measur geometri bert	4
trivial gradient-bas optim manifold	4
survei gan anomali detect	4
logit-bas uncertainti measur classif	4
discret drift two-play game	4
theoret insight wasserstein gan	4
data-effici instanc gener discrimin	4
introduct deep gener model	4
multimod synthesi visual attribut	4
slimmabl gener adversari network	4
improv consist regular gan	4
knowledge-bas regular gener model	4
dynam cluster feder learn	4
gradient-bas competit learn theori	4
local optim nonconvex-nonconcav minimax	4
intervent gener adversari network	4
unit gan extend abstract	4
co-occurr base textur synthesi	4
condit gan timeseri gener	4
differenti privat gener imag	4
robust gener adversari network	4
gener partial multi-view cluster	4
dual-discrimin gan profil recognit	4
gradient-bas learn continu game	4
inform bottleneck variat glass	4
classification-driven singl imag dehaz	4
distribut gener adversari net	4
polygan high-ord polynomi gener	4
prescrib gener adversari network	4
wgan estim wasserstein metric	4
gener adversari network gan	4
recurr adversari servic time	4
distribut match variat infer	4
anomali score gener model	4
metropolis-hast gener adversari network	4
effici gan-bas anomali detect	4
siclop silhouette-bas cloth peopl	4
meshgan non-linear morphabl model	4
random occlusion-recoveri person re-identif	4
train gan centripet acceler	4
fine-grain visual-textu represent learn	4
learn clean gan perspect	4
gan leav artifici fingerprint	4
anomali detect wasserstein gan	4
comixifi transform video comic	4
ensnet ensconc text wild	4
kernel-bas train gener network	4
understand gan lqg set	4
design inspir gener network	4
mri cross-mod neuroimage-to-neuroimag translat	4
easi high-dimension likelihood-fre infer	4
specular-to-diffus translat multi-view reconstruct	4
gradient estim implicit model	4
progress approach single-imag super-resolut	4
revisit classifi two-sampl test	4
evolutionari gener adversari network	4
boundary-seek gener adversari network	4
invert gener adversari network	4
magan align biolog manifold	4
improv train wasserstein gan	4
unsupervis histopathologi imag synthesi	4
triangl gener adversari network	4
gener adversari activ learn	4
actual actor-crit adversari learn	4
parametr filter cnn gan	4
gener adversari network overview	4
transfer gener adversari network	4
gener adversari map network	4
adversari discrimin heterogen recognit	4
toward large-pos frontal wild	4
gener identity-preserv adversari network	4
adagan boost gener model	4
learn implicit gener model	4
condit gener adversari network	4
coupl gener adversari network	4
gener moment match network	4
membership infer attack prune	4
topologi distil recommend system	4
knowledg distil semiparametr infer	4
polynomi network deep classifi	4
understand improv knowledg distil	4
graph prune model compress	4
learn low-rank approxim cnn	4
sparsiti deep neural network	4
deepfont identifi font imag	4
mask extract video sequenc	4
pointrend imag segment render	4
cluster base point-set kernel	4
label atlas deep-learning-bas segment	4
learn segment image-level supervis	4
sem-gan semantically-consist image-to-imag translat	4
real-tim predict segment qualiti	4
convolut crf semant segment	4
one-shot learn semant segment	4
imag segment algorithm overview	4
ultrasound imag segment survei	4
combin approach imag segment	4
model assist imag segment	4
reinforc learn sequenc model	4
weight train cross-task learn	4
inject hierarchi u-net transform	4
dynam train attent model	4
transform network travel salesman	4
mlperf mobil infer benchmark	4
effici semi-implicit variat infer	4
tensor subgraph search supernet	4
block-term tensor neural network	4
attnground talk car attent	4
privaci deep learn survei	4
transform network trajectori forecast	4
topology-awar graph pool network	4
varianc reduct spars gradient	4
robust aggreg feder learn	4
relat loss function t-norm	4
structur imag caption gener	4
low-rank approxim hyperbol embed	4
deep audio-visu speech recognit	4
latent align variat attent	4
attention-bas neural text segment	4
sequenc logic copi cach	4
person re-identif vision languag	4
collabor summar topic-rel video	4
actor-crit algorithm sequenc predict	4
boost imag caption attribut	4
multi-rel learn scale admm	4
imag caption semant attent	4
automat statistician relat perspect	4
structur smooth graphlet kernel	4
piecewis train undirect model	4
domain adapt statist classifi	4
natur languag process scratch	4
introduct condit random field	4
learn analogi semant relat	4
chemical-reaction-awar molecul represent learn	4
graph neural network draw	4
edge-similarity-awar graph neural network	4
stochast iter graph match	4
variat graph normal auto-encod	4
graph attent multi-lay perceptron	4
real-tim deep dynam charact	4
spatio-tempor graph contrast learn	4
survei deep semi-supervis learn	4
uncondit scene graph gener	4
crowd track relat video	4
stage tree asymmetry-label dag	4
parameter-effici person re-identif space	4
song self-organ neural graph	4
neural network branch-and-bound verif	4
multi-echo lidar object detect	4
feder graph classif non-iid	4
graph kernel attent transform	4
manifold learn arbitrari norm	4
onlin graph dictionari learn	4
inter-domain multi-rel link predict	4
benchmark learn non-homophil graph	4
causal invari predictor shift-robust	4
curvatur graph neural network	4
autom self-supervis learn graph	4
graph neural network heterophili	4
adversari robust len causal	4
learnabl hypergraph laplacian learn	4
low discrep sequenc graph	4
graph neural network neurosci	4
local aggreg heterophil graph	4
graph belief propag network	4
topolog graph neural network	4
understand bandit graph feedback	4
out-of-vocabulari entiti link predict	4
multi-ag low-dimension linear bandit	4
meta-induct node classif graph	4
network tensor time seri	4
non-recurs graph convolut network	4
learn granular flow simul	4
self-distil graph neural network	4
logic graph neural network	4
trackform multi-object track transform	4
revisit skeleton-bas action recognit	4
gddr gnn-base data-driven rout	4
graph-bas person signatur re-identif	4
convolut spatial interact model	4
matã©rn gaussian process graph	4
neural onlin graph explor	4
data augment manifold barycent	4
convolut scene graph gener	4
hierarch graph capsul network	4
autom backend-awar post-train quantiz	4
tangent space backpropag transform	4
progressive-x cluster consensu space	4
activ learn entiti align	4
embed graph auto-encod cluster	4
learn schedul dag task	4
wasserstein embed graph learn	4
spatio-tempor graph-rnn cloud predict	4
transfer graph optim compil	4
bootstrap represent learn graph	4
graph-aid onlin multi-kernel learn	4
robust multi-view rotat averag	4
graph joint attent network	4
gener weisfeiler-lehman graph kernel	4
local propag few-shot learn	4
distance-wis graph contrast learn	4
set2graph learn graph set	4
deepgg deep graph gener	4
attention-bas learn molecular ensembl	4
hindsight network credit assign	4
manifold partit discrimin analysi	4
dirichlet graph variat autoencod	4
hybrid model learn branch	4
few-shot imag recognit manifold	4
revisit neural architectur search	4
graph deep factor forecast	4
toward express graph represent	4
learn interpret multi-multi-inst network	4
spectral embed graph network	4
fair meta-learn few-shot classif	4
k-hop graph neural network	4
epitom variat graph autoencod	4
salienc predict extern knowledg	4
end-to-end optim scene layout	4
graph convolut network road	4
visual relat ground video	4
graph-bas social relat reason	4
graph structural-top neural network	4
learn complex simul anneal	4
learn differenti perturb optim	4
supervis dag causal discoveri	4
learn dag impos acycl	4
non-loc graph neural network	4
non-iid graph neural network	4
energy-awar dnn graph optim	4
reinforc learn feedback graph	4
direct graph convolut network	4
semi-implicit graph variat auto-encod	4
binar graph neural network	4
consist multipl sequenc decod	4
learn conserv network flow	4
effici sampl softmax tensorflow	4
context-awar human motion predict	4
non-loc part-awar cloud denois	4
advanc collabor filter rank	4
gradient-bas neural dag learn	4
pairnorm tackl oversmooth gnn	4
direction-awar attribut graph embed	4
hyoutub video harmon dataset	4
ifbid inference-fre bia detect	4
toward photorealist color imagin	4
learn structur imag color	4
neural rgb-d surfac reconstruct	4
recognit meet occlus benchmark	4
gan-control explicitli control gan	4
ground metric learn graph	4
reinforc learn augment data	4
shape illumin reflect shade	4
neurodynam model salienc predict	4
flow-edg guid video complet	4
imag styliz robust featur	4
fast fourier color constanc	4
burst denois dark imag	4
condit variat imag derain	4
colorfool semant adversari color	4
real-tim deep multi-camera track	4
benchmark tempor color constanc	4
multi-hypothesi approach color constanc	4
multi-attribut guid paint gener	4
cascad convolut color constanc	4
observ properti color graph	4
domain-invari stereo match network	4
human synthesi scene composit	4
deceptionnet network-driven domain random	4
learn collabor stereo refin	4
color constanc convolut autoencod	4
multi-target embodi question answer	4
neural style transfer cloud	4
quaternion convolut neural network	4
multi-view inpaint rgb-d sequenc	4
optic illus imag dataset	4
segan segment gener invis	4
dualiti retinex imag dehaz	4
disentangl factor variat mix	4
smooth spars optim transport	4
salienc driven imag manipul	4
deep semantics-awar photo adjust	4
classif aerial photogrammetr cloud	4
predict impress deep learn	4
learn divers imag color	4
dens multi-view 3d-reconstruct correspond	4
robust depth-bas person re-identif	4
perception-bas energi function seam-cut	4
transport distanc signal analysi	4
rocs-deriv featur virtual screen	4
recod color transfer homographi	4
spars code alpha mat	4
super-resolv retin imag mosaic	4
a-expans multipl hedgehog shape	4
deep end2end voxel2voxel predict	4
color constanc us cnn	4
imag classif optim reproduct	4
depth-guid camouflag object detect	4
learn optic flow imag	4
vision transform dens predict	4
stereo object match network	4
structure-from-mot rgbd depth fusion	4
monocular depth parameter network	4
multimod end-to-end autonom drive	4
consist video depth estim	4
learn stereo singl imag	4
paramet camera model twelv	4
detect defici coverag colonoscopi	4
monster awaken mono stereo	4
self-supervis monocular depth hint	4
unifi formul visual odometri	4
monocular depth estim survei	4
singl view stereo match	4
learn spars represent depth	4
cloud pre-train mix disentangl	4
4d-net learn multi-mod align	4
cloud segment us gi	4
learn embed data process	4
learn stixel-bas instanc segment	4
zero shot cloud upsampl	4
robust pool data mode	4
lietransform equivari self-attent lie	4
d3dlo deep lidar odometri	4
deep magnification-flex upsampl cloud	4
point-bas model human cloth	4
pagerank k-mean cluster algorithm	4
success subspac learn overview	4
partial observ exchang model	4
hyperpocket gener cloud complet	4
distinct local deep descriptor	4
hausdorff convolut geometr prior	4
registr self-occlud object context	4
learn predict layout scene	4
kaplan descriptor shape complet	4
effici long-rang convolut cloud	4
orderli disord cloud domain	4
keypoint autoencod learn semant	4
privaci preserv visual slam	4
geodesic-hof reconstruct cut corner	4
nonlinear higher-ord label spread	4
samplenet differenti cloud sampl	4
univers equivari set network	4
review deep learn cloud	4
multi-view pointnet scene understand	4
effici deep neural network	4
invari equivari graph network	4
delio decoupl lidar odometri	4
cloud registr shape constraint	4
neighbor semant segment cloud	4
fully-convolut network large-scal cloud	4
depth-awar cnn rgb-d segment	4
sampl superquadr cloud normal	4
segcloud semant segment cloud	4
mesh-bas textur urban map	4
explor object recognit cloud	4
deep project semant segment	4
deep learn set cloud	4
recognit spars spheric represent	4
scale-invari represent machin learn	4
deep network multipl manifold	4
graph contrast learn augment	4
approxim cross-valid structur model	4
learn manifold teacher demonstr	4
coupl learn complex interact	4
deductron recurr neural network	4
hyperbol graph neural network	4
multipl graph adversari learn	4
function represent graph match	4
stream graph neural network	4
dual-prim graph convolut network	4
complex spars label propag	4
activ learn graph embed	4
kernel-bas reconstruct graph signal	4
learn optic flow match	4
deep two-view structure-from-mot revisit	4
restor video pseudo clean	4
motion-blur video interpol extrapol	4
df-vo learnt visual odometri	4
video model correl network	4
two-stream amtnet action detect	4
probabilist pixel-adapt refin network	4
represent flow action recognit	4
guid video object segment	4
depth-awar video frame interpol	4
stereo object trajectori reconstruct	4
learn human optic flow	4
qiniu submiss activitynet challeng	4
deep motion boundari detect	4
predictive-correct network action detect	4
self-supervis learn motion captur	4
learn segment move object	4
guid optic flow learn	4
learn motion pattern video	4
spatial-tempor decomposit optic flow	4
multi-wai particl swarm fusion	4
learn motion represent phase	4
parametr object motion blur	4
take deeper look pedestrian	4
correl estim compress imag	4
reinforc learn encrypt data	4
potential-bas reward shape sokoban	4
activ offlin polici select	4
boost approach reinforc learn	4
polici gradient incorpor futur	4
applic deep neural network	4
parallel revers curriculum gener	4
pathwis condit gaussian process	4
action redund reinforc learn	4
demonstration-guid reinforc learn skill	4
search feedback reinforc learn	4
neural network smooth constraint	4
zeroth-ord supervis polici improv	4
restrict offlin reinforc learn	4
learn task inform abstract	4
learn off-polici onlin plan	4
unifi framework conserv explor	4
batch value-funct approxim realiz	4
continuous-tim model-bas reinforc learn	4
mirror descent polici optim	4
invers constrain reinforc learn	4
learn gap neurosci reinforc	4
reinforc learn rideshar survei	4
conserv safeti critic explor	4
model optim trade-off meta-learn	4
optim market reinforc learn	4
reinforc learn beyond expect	4
zero-cost proxi lightweight na	4
regular behavior valu estim	4
sampl complex teaching-by-reinforc q-learn	4
explor incent reinforc learn	4
safe distribut reinforc learn	4
model-bas reinforc learn survei	4
semi-supervis polici reinforc learn	4
offlin meta learn explor	4
adapt approxim polici iter	4
newton-typ method minimax optim	4
risk-avers bayes-adapt reinforc learn	4
derivative-fre reinforc learn review	4
onlin spars reinforc learn	4
risk-avers offlin reinforc learn	4
reverb framework experi replai	4
analysi frame-skip reinforc learn	4
reinforc learn control valv	4
optimist adapt lagrangian hedg	4
meta-learn via learn loss	4
quantiz reinforc learn quarl	4
regular polici reward robust	4
lyapunov-bas reinforc learn estim	4
leverag averag analysi regular	4
assur reinforc learn constraint	4
offlin reinforc learn hands-on	4
realab embed perspect tamper	4
grac self-guid self-regular actor-crit	4
meta-learn neural network survei	4
special hierarch learn system	4
forethought hindsight credit assign	4
constrain optim polici space	4
iter amort polici optim	4
implicit distribut reinforc learn	4
learning-driven explor reinforc learn	4
bidirect model-bas polici optim	4
probabilist machin learn healthcar	4
model shape reinforc learn	4
reinforc learn strateg recommend	4
model-fre episod control aggreg	4
distribut multi-ag video fast-forward	4
nonparametr off-polici polici gradient	4
curriculum learn progress function	4
adapt trade-off off-polici learn	4
greedi bandit sampl context	4
unsupervisedli learn represent quest	4
framework reinforc learn plan	4
interaction-limit invers reinforc learn	4
equivari deep reinforc learn	4
task-agnost explor reinforc learn	4
machin learn control theori	4
catastroph interfer atari game	4
polici gradient demonstr curios	4
stabl effici polici evalu	4
polici entropi out-of-distribut classif	4
energy-bas hindsight experi priorit	4
simpl sensor intent explor	4
explain reinforc learn survei	4
discrete-to-deep supervis polici learn	4
unsupervis meta-learn reinforc learn	4
evolutionari stochast polici distil	4
reinforc learn healthcar survei	4
learn zoom deep reinforc	4
time adapt reinforc learn	4
uniform abstract reinforc learn	4
augment imit learn aqil	4
taylor expans polici optim	4
uncertainty-sensit learn plan ensembl	4
reinforc learn activ infer	4
toward modular algorithm induct	4
tarmac target multi-ag commun	4
curriculum gradient-bas meta-reinforc learn	4
empir polici evalu supergraph	4
meta-learn warp gradient descent	4
dynamics-awar unsupervis discoveri skill	4
solv cooper marl experi	4
autom curricula setter-solv interact	4
reinforc learn action avail	4
reconcil -return experi replai	4
reinforc learn goal-dist gradient	4
hierarchi sometim reinforc learn	4
bias-vari tradeoff textbook updat	4
adapt behaviour learn progress	4
off-polici evalu via classif	4
learn fair multi-ag system	4
learn transfer graph explor	4
correl prior reinforc learn	4
stabil transform reinforc learn	4
self-pac contextu reinforc learn	4
learn adapt rate schedul	4
target-bas tempor differ learn	4
learn spars represent reinforc	4
oppon awar reinforc learn	4
model-bas lookahead reinforc learn	4
goal-driven sequenti data abstract	4
neural logic reinforc learn	4
learn behavior repertoir demonstr	4
benchmark model-bas reinforc learn	4
learn cope adversari attack	4
toward empath deep q-learn	4
direct explor reinforc learn	4
gray-box approach curriculum learn	4
distribution robust reinforc learn	4
emi explor mutual inform	4
micro-object perspect reinforc learn	4
improv reinforc learn curriculum	4
assum densiti filter q-learn	4
actor-attention-crit multi-ag reinforc learn	4
separ valu function time-scal	4
rememb forget experi replai	4
learn action represent reinforc	4
collabor evolutionari reinforc learn	4
knowledg flow improv teacher	4
programmat interpret reinforc learn	4
orthogon estim wasserstein distanc	4
transfer knowledg learn process	4
reinforc learn invers system	4
hierarch reinforc learn hindsight	4
norml no-reward meta learn	4
combin q-learn dou zhu	4
embodi multimod multitask learn	4
implicit polici reinforc learn	4
soft actor-crit algorithm applic	4
reward shape via meta-learn	4
causal reason meta-reinforc learn	4
oracle-effici pac rich observ	4
tempor differ variat auto-encod	4
backplai muss immer umkehren	4
trajectory-bas learn ball-in-maz game	4
gener adversari self-imit learn	4
reinforc learn deep heurist	4
toward interpret deep q-network	4
natur gradient deep q-learn	4
import weight evolut strategi	4
data-effici hierarch reinforc learn	4
model-ensembl trust-region polici optim	4
costate-focus model reinforc learn	4
goal-ori trajectori effici explor	4
time limit reinforc learn	4
relat deep reinforc learn	4
explor distribut reinforc learn	4
hierarch imit reinforc learn	4
learn symmetr low-energi locomot	4
mirror descent search acceler	4
deeper look experi replai	4
benchmark project simul navig	4
distribution-awar sampl deep q-learn	4
learn deep sketch abstract	4
learn explor meta-polici gradient	4
interpret via model extract	4
polici optim genet distil	4
kickstart deep reinforc learn	4
recurr predict polici network	4
distribut priorit experi replai	4
multi-task learn continu control	4
paramet space nois explor	4
invers risk-sensit reinforc learn	4
reinforc learn model mismatch	4
intrigu properti adversari exampl	4
manifold regular kernel lstd	4
epicuru father reinforc learn	4
meta-sgd learn quickli few-shot	4
proxim polici optim algorithm	4
starcraft challeng reinforc learn	4
learn light transport reinforc	4
input convex neural network	4
learn noisi web video	4
metacontrol adapt imagination-bas optim	4
combin polici gradient q-learn	4
separ concern reinforc learn	4
agent-agnost human-in-the-loop reinforc learn	4
visual dynam t-sne semi-mdp	4
deep successor reinforc learn	4
mazebas sandbox learn game	4
weight uncertainti neural network	4
deep sequenti neural network	4
spars q-learn mirror descent	4
compact hierarch q-function decomposit	4
axiom ration reinforc learn	4
evolutionari algorithm reinforc learn	4
unpair depth super-resolut wild	4
discov semant super-resolut network	4
video super-resolut long-term self-exemplar	4
ntire challeng video super-resolut	4
comisr compression-inform video super-resolut	4
learn spatial attent super-resolut	4
deform convolut video super-resolut	4
video super-resolut tempor attent	4
zoom detail human-centr video	4
space-time-awar multi-resolut video enhanc	4
deep journei super-resolut survei	4
learn multi-view textur super-resolut	4
scale-wis convolut imag restor	4
joint super-resolut align tini	4
convolut bipartit attractor network	4
feedback network imag super-resolut	4
learning-bas framework line-spectra super-resolut	4
ensembl super-resolut refer dataset	4
deep learn multiple-imag super-resolut	4
boost method imag super-resolut	4
deep back-project network super-resolut	4
divers realist imag synthesi	4
convolut low-resolut fine-grain classif	4
real-tim deep video deinterlac	4
super-resolut via deep learn	4
volumetr super-resolut multispectr data	4
sub-pixel registr wavelet-encod imag	4
detail-rev deep video super-resolut	4
con-patch patch meet context	4
hash imag patch zoom	4
modern introduct onlin learn	4
deep learning-bas super-resolut survei	4
dont divid polar conquer	4
attent network imag super-resolut	4
specificity-preserv rgb-d salienc detect	4
sotr segment object transform	4
occlusion-awar video object inpaint	4
deep geospati interpol network	4
context awar object geotag	4
tempor abstract partial model	4
framework imbalanc time-seri forecast	4
action forecast feature-wis self-attent	4
deep momentum uncertainti hash	4
paramet select pai attent	4
cross-view geo-loc evolv transform	4
image-to-imag translat method applic	4
meta-learn rel density-ratio estim	4
attent bottleneck multimod fusion	4
local reweight adversari train	4
deep learn anti-spoof survei	4
neural pharmacodynam space model	4
model-bas counterfactu synthes interpret	4
matrix game bandit feedback	4
atom3d task molecul dimens	4
structur guid lane detect	4
attent meta-learn polythet classifi	4
bayesian attent belief network	4
transform convolut neural network	4
choos transform fourier galerkin	4
gaze estim us transform	4
foveat transform imag classif	4
chi-squar test distanc correl	4
gender in-the-wild infer solv	4
trtr visual track transform	4
re-think co-sali object detect	4
segmentation-ground scene graph gener	4
decoupl dynam filter network	4
advhaz adversari haze attack	4
inter-choic depend super-network weight	4
statist infer individu fair	4
non-autoregress coarse-to-fin video caption	4
triple-coop video shadow detect	4
causal attent vision-languag task	4
helicopt track identif autoencod	4
dynam embed interact predict	4
survei reconstruct uncalibr imag	4
evolv attent residu convolut	4
hard-attent scalabl imag classif	4
main multihead-attent imput network	4
gener multi-label zero-shot learn	4
neolix dataset autonom drive	4
deep video inpaint detect	4
facex-zoo pytorch toolbox recognit	4
ducttak spatiotempor video composit	4
multi-view collabor network embed	4
throughput screen machin learn	4
direct attent featur learn	4
learn set symmetr element	4
explor altern softmax function	4
spatiotempor attack embodi agent	4
hyperrealist imag inpaint hypergraph	4
detail virtual try-on carv	4
flexor trainabl fraction quantiz	4
trade transform densiti estim	4
sub-instruct awar vision-and-languag navig	4
fast transform cluster attent	4
express graph inform network	4
enhanc quadrat video interpol	4
attent augment convolut network	4
survei deep activ learn	4
leverag local multi-camera associ	4
deep unsupervis activ learn	4
deep knowledg trace convolut	4
class order increment learn	4
soft anchor-point object detect	4
multi-spectr facial landmark detect	4
enk encod time-inform convolut	4
structur multimod attent textvqa	4
quantifi attent flow transform	4
domain condit adapt network	4
high-perform long-term track meta-updat	4
squeeze-and-attent network semant segment	4
dynam convolut attent kernel	4
hierarch transform unsupervis pars	4
convolut spectral kernel learn	4
dual graph represent learn	4
dual-attent gan large-pos frontal	4
electr theft detect self-attent	4
aesthet qualiti assess photograph	4
translat local mask-bas image-to-imag	4
adapt grad-cam embed network	4
local weight ensembl cluster	4
framework salienc detect method	4
david dual-attent video deblur	4
dual-attent graph convolut network	4
precipit nowcast star-bridg network	4
bayesian learn sum-product network	4
multi-rel poincarã© graph embed	4
robust gan dishonest adversari	4
deep multi-view learn rank	4
metric learn imbalanc data	4
writerforc gener stori end	4
deep ordin reinforc learn	4
convolut network handwrit recognit	4
augment self-attent persist memori	4
reproduc machin learn health	4
simplifi graph convolut network	4
stand-alon self-attent vision model	4
bag color featur constanc	4
path-aug graph transform network	4
super interact neural network	4
video action transform network	4
query-guid end-to-end person search	4
novel object imag caption	4
attent single-task multipl task	4
aggreg cross-entropi sequenc recognit	4
relat graph attent network	4
end-to-end multi-task learn attent	4
distil perform enhanc student	4
contingency-awar explor reinforc learn	4
gslam slam framework benchmark	4
detector-in-detector multi-level analysi human-part	4
attend time imag caption	4
attent road safeti network	4
multi-task learn financi forecast	4
attention-awar multi-strok style transfer	4
visual social relationship recognit	4
distribut network set learn	4
doubl sphere camera model	4
revers recurr neural network	4
learn spars transform backpropag	4
sampl learn data era	4
textual explan self-driv vehicl	4
adversari attribute-imag person re-identif	4
pars tabl structur wild	4
toward domain-agnost contrast learn	4
imputation-fre learn incomplet observ	4
tabular data deep learn	4
baselin local featur attribut	4
near-optim reinforc learn self-plai	4
semi-supervis learn normal flow	4
automat bayesian densiti analysi	4
adversari learn anomali detect	4
unsupervis learn neurosymbol encod	4
fair cluster bound cost	4
cluster left-censor multivari time-seri	4
disentangl recurr wasserstein autoencod	4
intra-camera supervis person re-identif	4
gan ensembl anomali detect	4
bigemin prior variat auto-encod	4
fair machin learn survei	4
autoencod strateg decis support	4
spectral learn matric tensor	4
deep semi-supervis anomali detect	4
increment elmvi unsupervis learn	4
subspac cluster activ learn	4
probabilist framework quantum cluster	4
gener slice wasserstein distanc	4
provabl estim block model	4
represent learn dynam graph	4
jade joint autoencod dis-entangl	4
probabilist framework deep learn	4
recurr exponential-famili harmonium backprop-through-tim	4
fast cross-valid increment learn	4
exampl select dictionari learn	4
unsupervis pretrain encourag moderate-spars	4
survei semi-supervis learn techniqu	4
justifi information-geometr causal infer	4
privileg inform data cluster	4
cluster learn robot vision	4
semi-supervis cluster ensembl vote	4
s-lime stabilized-lim model explan	4
pitfal explain industri perspect	4
correspondence-driven monocular categori reconstruct	4
implicit regular tensor factor	4
effici explan relev set	4
exon explain encod network	4
taxonomi academ plagiar method	4
estim cluster d-dimension sphere	4
convolut net sample-effici fully-connect	4
pqa perceptu question answer	4
bayesian network structur learn	4
mixup help robust gener	4
activ select classif featur	4
shaplei explain data manifold	4
data-bas discoveri govern equat	4
research reproduc surviv analysi	4
predict k-mean local model	4
regular invers reinforc learn	4
low-resolut recognit resource-constrain environ	4
implicit competit regular gan	4
mathemat theori cooper commun	4
verifi caus adversari exampl	4
bayesian decis tree algorithm	4
explain -mean -median cluster	4
look deeper tabular lime	4
variat bay model misspecif	4
variabl select copula entropi	4
toward visual video frame	4
explain machin learn deploy	4
consist anchor-bas spectral cluster	4
counterfactu explan concept drift	4
causal infer deep graph	4
learn reason theori imit	4
revisit backpropag salienc method	4
merl multi-head reinforc learn	4
model agnost multilevel explan	4
onlin multilinear dictionari learn	4
explain theoret analysi lime	4
add-lib decis diagram practic	4
recov local adversari attack	4
tcga meta-dataset clinic benchmark	4
flow perception-refin physic simul	4
extract incent black-box decis	4
graph represent learn survei	4
understand bia machin learn	4
optim piecewis local-linear approxim	4
spectral analysi latent represent	4
explain predict nonlinear model	4
mixup direct adversari train	4
handcraft deep local featur	4
hand pose estim survei	4
learn explain complement exampl	4
deep visual citi recognit	4
select overview deep learn	4
pitfal measur emerg commun	4
element sequenti mont carlo	4
weakly- semi-supervis panopt segment	4
adversari robust odd simplic	4
unrol optim deep prior	4
trust model-agnost hierarch explan	4
interpret neural network fragil	4
regular denois clarif interpret	4
near-optim explain -mean dimens	4
learn stochast decis tree	4
strong optim classif tree	4
snapboost heterogen boost machin	4
explain empir risk minim	4
enhanc simpl model exploit	4
optim tree gener id3	4
robust verif tree-bas model	4
adversari robust toolbox v100	4
neural logic rule layer	4
random pairwis shapelet forest	4
pac-bayesian bound random forest	4
random forest label rank	4
extrem fast decis tree	4
hyperparamet optim spectral approach	4
cost-complex prune random forest	4
gpu-acceler large-scal tree boost	4
machin learn futur realism	4
batch lazi decis tree	4
fast learn spars data	4
analysi random forest model	4
classif time seri meaning	4
continu latent process flow	4
tempor graph signal decomposit	4
latent time-adapt drift-diffus model	4
probabilist sequenti matrix factor	4
few-shot learn time-seri forecast	4
static dynam node embed	4
set function time seri	4
spatio-tempor function neural network	4
deep markov spatio-tempor factor	4
convolut condit neural process	4
evalu chang detect algorithm	4
dualiti network flow lasso	4
stream variat mont carlo	4
linear dynam cluster identif	4
monoton gaussian process flow	4
differenti bayesian neural net	4
explicit-dur markov switch model	4
time-smooth gradient onlin forecast	4
adversari attack time seri	4
low-pass filter bayesian infer	4
bayesian nonparametr spectral estim	4
precis recal time seri	4
multi-horizon quantil recurr forecast	4
dimension time seri gener	4
anomali detect industri data	4
diffus map meet nystrã¶m	4
probabilist recurr state-spac model	4
deep forecast learning-bas spatio-tempor	4
graph-bas predict featur analysi	4
unsupervis learn comput phenotyp	4
co-adapt learn countabl space	4
quantif in-the-wild data-set baselin	4
approach physiolog time seri	4
scalabl discoveri time-seri shapelet	4
onlin learn predict sequenc	4
autoregress kernel time seri	4
graph framework retrosynthesi predict	4
symmetry-awar actor-crit molecular design	4
project preferenti bayesian optim	4
model search synthesiz molecul	4
automat hyperparamet select autodock	4
multi-hop assort network classif	4
pyramid medic transform imag segment	5
transform network semant imag segment	5
membership infer attack easier difficult	5
source-fre domain adapt imag segment	5
toward robust medic imag segment	5
medic mat perspect segment uncertainti	5
adversari segment loss sketch color	5
boundarysqueez imag segment boundari squeez	5
source-relax domain adapt imag segment	5
semi-supervis learn ey imag segment	5
finit equivari neural network game	5
scribble-bas domain adapt via co-segment	5
[truncated: 15,157 more rows]

## Sheet: arXiv_Descriptive_Statistics
Descriptive Statistics (arXiv Dataset)
Mean	6.8727
Standard Error	0.016071
Median	7
Mode	6
Standard Deviation	2.105
Sample Variance	4.43101
Kurtosis	0.597759
Skewness	0.483977
Range	16
Minimum	1
Maximum	17
Sum	117908
Count	17156
Largest(1)	17
Smallest(1)	1
Confidence Level(95.0%)	0.0315008

## Sheet: arXiv_Histogram
Bin	Frequency	Cumulative %	Bin	Frequency	Cumulative %
1	9	0.000524598	6	3423	0.199522
2	125	0.00781068	7	3373	0.39613
3	555	0.0401609	8	2508	0.542318
4	1298	0.11582	5	2411	0.682851
5	2411	0.256353	9	1628	0.777745
6	3423	0.455875	4	1298	0.853404
7	3373	0.652483	10	934	0.907846
8	2508	0.798671	3	555	0.940196
9	1628	0.893565	11	484	0.968408
10	934	0.948007	12	224	0.981464
11	484	0.976218	2	125	0.98875
12	224	0.989275	13	106	0.994929
13	106	0.995453	14	49	0.997785
14	49	0.99831	15	15	0.998659
15	15	0.999184	1	9	0.999184
16	7	0.999592	16	7	0.999592
17	7	1	17	7	1
More	0	1	More	0	1
