# Supplementary material for: TextNetTopics Pro, a topic model-based text classification for short text by integration of semantic and document-topic distribution information
Source: Front Genet. 2023 Oct 5;14:1243874. doi: 10.3389/fgene.2023.1243874 (PMC10585361; doi:10.3389/fgene.2023.1243874)
Supplement: Supplementary file 5 [file DataSheet2.xlsx]

## Sheet: TW_CAMDA
GSDMM										PTM										BTM										SATM										WNTM
#Accumlated_Topics	#Terms (Mean)	Accuracy (Mean)	Recall (Mean)	Specifity (Mean)	F-measure (Mean)	Area Under Curve (Mean)	Precision (Mean)	Cohen's kappa (Mean)		#Accumlated_Topics	#Terms (Mean)	Accuracy (Mean)	Recall (Mean)	Specifity (Mean)	F-measure (Mean)	Area Under Curve (Mean)	Precision (Mean)	Cohen's kappa (Mean)		#Accumlated_Topics	#Terms (Mean)	Accuracy (Mean)	Recall (Mean)	Specifity (Mean)	F-measure (Mean)	Area Under Curve (Mean)	Precision (Mean)	Cohen's kappa (Mean)		#Accumlated_Topics	#Terms (Mean)	Accuracy (Mean)	Recall (Mean)	Specifity (Mean)	F-measure (Mean)	Area Under Curve (Mean)	Precision (Mean)	Cohen's kappa (Mean)		#Accumlated_Topics	#Terms (Mean)	Accuracy (Mean)	Recall (Mean)	Specifity (Mean)	F-measure (Mean)	Area Under Curve (Mean)	Precision (Mean)	Cohen's kappa (Mean)
20	185	0.851032	0.847525	0.854585	0.851366	0.903359	0.855447	0.702067		20	275	0.859502	0.863083	0.855874	0.860742	0.919878	0.858528	0.718983		20	194	0.85452	0.847808	0.861318	0.854282	0.907141	0.861026	0.709057		20	245	0.857153	0.861245	0.853009	0.858503	0.916757	0.855898	0.714283		20	220	0.842705	0.841301	0.844126	0.843334	0.898879	0.845545	0.685406
19	173	0.850819	0.842433	0.859312	0.850389	0.902576	0.858701	0.70166		19	257.4	0.860427	0.858699	0.862178	0.860901	0.918477	0.863342	0.720853		19	187	0.855943	0.845403	0.866619	0.85515	0.90702	0.865281	0.711918		19	233	0.854591	0.8529	0.856304	0.855134	0.912981	0.857544	0.709179		19	209.1	0.842562	0.838331	0.846848	0.842755	0.898454	0.847355	0.685132
18	167	0.851459	0.841726	0.861318	0.850828	0.901563	0.860291	0.702946		18	244	0.860427	0.857284	0.86361	0.86072	0.918659	0.86441	0.720858		18	182	0.856085	0.846535	0.865759	0.855452	0.906343	0.864667	0.712199		18	221.2	0.854733	0.853748	0.855731	0.855387	0.911695	0.857137	0.709461		18	199	0.842206	0.835785	0.848711	0.842047	0.897445	0.848596	0.684429
17	159.8	0.850819	0.840028	0.861748	0.850048	0.901596	0.860541	0.701668		17	233	0.859644	0.855587	0.863754	0.859797	0.917097	0.86428	0.719295		17	176.5	0.855872	0.843564	0.868338	0.854828	0.906299	0.866509	0.711782		17	210.4	0.854804	0.850495	0.859169	0.854963	0.910613	0.859602	0.709616		17	192	0.840996	0.834936	0.847135	0.840895	0.896628	0.847111	0.682008
16	149	0.851246	0.835219	0.867479	0.849656	0.902122	0.864795	0.702543		16	219.6	0.858648	0.853041	0.864327	0.858603	0.916569	0.864416	0.717308		16	170.5	0.854093	0.839745	0.868625	0.852723	0.906195	0.866196	0.708232		16	200	0.854591	0.845545	0.863754	0.854053	0.908513	0.862914	0.709207		16	181	0.842633	0.832815	0.852579	0.841925	0.894492	0.85146	0.685297
15	140.5	0.849751	0.83338	0.866332	0.848106	0.900726	0.863536	0.699555		15	206	0.858434	0.851909	0.865043	0.858229	0.915517	0.864854	0.716885		15	161.1	0.851744	0.836492	0.867192	0.850216	0.903731	0.864548	0.703538		15	190	0.852811	0.845403	0.860315	0.852519	0.906525	0.859858	0.705642		15	170	0.840783	0.823904	0.85788	0.838907	0.894584	0.854666	0.681626
14	133.3	0.846904	0.827016	0.867049	0.844679	0.89948	0.86325	0.693876		14	193	0.855872	0.844979	0.866905	0.855069	0.913035	0.865522	0.711776		14	149.8	0.850107	0.828996	0.87149	0.847663	0.900448	0.867306	0.700287		14	177	0.851103	0.838048	0.864327	0.849947	0.905484	0.862331	0.702248		14	161	0.84	0.822065	0.858166	0.837949	0.894285	0.854757	0.680064
13	124.2	0.847331	0.822772	0.872206	0.844348	0.897518	0.867246	0.694749		13	185	0.856228	0.843423	0.869198	0.855144	0.912988	0.86736	0.712495		13	141.1	0.8479	0.831825	0.864183	0.846201	0.900204	0.861252	0.695856		13	167.2	0.850249	0.835926	0.864756	0.848889	0.903935	0.862443	0.700545		13	150.8	0.837936	0.818953	0.857163	0.835688	0.89345	0.853294	0.675942
12	117.8	0.844911	0.822631	0.867479	0.842244	0.896293	0.863022	0.689902		12	171	0.853452	0.836775	0.870344	0.851783	0.908574	0.86749	0.706958		12	131	0.848541	0.826025	0.871347	0.845848	0.899484	0.866745	0.697162		12	158.3	0.848826	0.832956	0.8649	0.847206	0.899555	0.862168	0.697704		12	142.1	0.834733	0.815842	0.853868	0.832452	0.891402	0.849949	0.669537
11	111.3	0.840783	0.818529	0.863324	0.838044	0.893132	0.858837	0.681647		11	157	0.851246	0.832673	0.870057	0.849237	0.905577	0.866644	0.702554		11	123	0.845125	0.820651	0.869914	0.842041	0.897344	0.86474	0.690339		11	147.6	0.844128	0.824328	0.864183	0.841805	0.892561	0.860178	0.688327		11	131.4	0.837224	0.817963	0.856734	0.834912	0.890138	0.852784	0.67452
10	103	0.837082	0.811881	0.862607	0.833757	0.888214	0.857041	0.67426		10	145.3	0.848327	0.826733	0.870201	0.845761	0.903225	0.865889	0.696731		10	114.6	0.845267	0.821499	0.869341	0.8423	0.896541	0.864348	0.690621		10	135.1	0.825338	0.799293	0.851719	0.821388	0.873871	0.84506	0.650789		10	119.9	0.833879	0.812588	0.855444	0.831154	0.887655	0.850776	0.66784
9	95	0.833025	0.81174	0.854585	0.830284	0.88641	0.849967	0.666132		9	133.3	0.843416	0.820934	0.866189	0.840645	0.898793	0.861736	0.686914		9	105	0.843559	0.814003	0.873496	0.839601	0.894618	0.866955	0.687229		9	123.7	0.819431	0.78826	0.851003	0.814463	0.867662	0.842687	0.638999		9	109	0.829609	0.804809	0.854728	0.826197	0.884754	0.848925	0.659316
8	84	0.830391	0.803678	0.85745	0.826651	0.885236	0.851228	0.66089		8	120.5	0.838007	0.812447	0.863897	0.834638	0.893332	0.858318	0.676112		8	93.5	0.839217	0.810325	0.868481	0.835259	0.890866	0.861897	0.678546		8	111.4	0.811673	0.771853	0.852006	0.804675	0.859186	0.840645	0.623533		8	99.8	0.825765	0.799717	0.852149	0.822048	0.878517	0.846024	0.651637
7	75.6	0.830107	0.80396	0.85659	0.826459	0.88214	0.85051	0.660318		7	106.2	0.830961	0.802546	0.859742	0.826863	0.886988	0.852852	0.662038		7	82	0.838292	0.806789	0.870201	0.833851	0.889218	0.862908	0.676707		7	101.3	0.804342	0.759123	0.850143	0.796046	0.848756	0.836917	0.608903		7	90.6	0.824484	0.795191	0.854155	0.820119	0.874247	0.846965	0.649091
6	67	0.827972	0.796181	0.860172	0.823224	0.87893	0.852444	0.656075		6	93	0.819359	0.778501	0.860745	0.812609	0.870178	0.85004	0.6389		6	71.5	0.833737	0.803395	0.86447	0.829446	0.882523	0.857309	0.667594		6	90	0.796726	0.751485	0.84255	0.788078	0.838542	0.828705	0.59368		6	80.3	0.820427	0.785856	0.855444	0.814964	0.868262	0.846724	0.641004
5	59	0.826192	0.792504	0.860315	0.821067	0.875207	0.852003	0.652526		5	79.3	0.788256	0.734936	0.842264	0.777439	0.832059	0.825415	0.576793		5	61	0.827402	0.794342	0.860888	0.822413	0.873821	0.852646	0.654942		5	76	0.786121	0.730835	0.84212	0.774639	0.82745	0.8243	0.572538		5	69	0.817153	0.77454	0.860315	0.809966	0.86564	0.849105	0.634497
4	48.4	0.811815	0.767044	0.857163	0.803974	0.860001	0.844857	0.623838		4	67.2	0.77694	0.712023	0.842693	0.762594	0.819486	0.821153	0.554242		4	53.6	0.822989	0.785856	0.860602	0.817074	0.867563	0.851044	0.646139		4	64	0.779858	0.717256	0.843266	0.766237	0.819623	0.822668	0.560061		4	57.2	0.807473	0.762518	0.853009	0.799423	0.855206	0.840432	0.615159
3	40	0.806406	0.75389	0.859599	0.79667	0.851413	0.844971	0.613064		3	54	0.766619	0.695757	0.838395	0.749985	0.807716	0.813632	0.533654		3	42.5	0.799431	0.737058	0.862607	0.787032	0.835388	0.844472	0.599176		3	50.8	0.767829	0.693211	0.84341	0.750147	0.806319	0.817816	0.536097		3	46	0.792669	0.735785	0.850287	0.781201	0.840716	0.832944	0.585632
2	32.4	0.795801	0.736775	0.855587	0.78398	0.835591	0.838152	0.591903		2	37.7	0.743345	0.643706	0.844269	0.715959	0.775872	0.807315	0.487342		2	32	0.767117	0.666761	0.868768	0.742335	0.798416	0.83737	0.534827		2	36	0.754804	0.661386	0.849427	0.730709	0.788692	0.816606	0.510189		2	32.3	0.76306	0.694908	0.832092	0.746938	0.804631	0.807589	0.526526
1	20	0.764413	0.674823	0.855158	0.742345	0.799099	0.825812	0.529359		1	20	0.697438	0.554738	0.841977	0.648441	0.723315	0.781061	0.395977		1	20	0.758078	0.668034	0.849284	0.73537	0.785858	0.818394	0.516706		1	20	0.737367	0.623762	0.852436	0.704935	0.768392	0.810982	0.475492		1	20	0.758363	0.676803	0.840974	0.738141	0.795283	0.811952	0.517223
Features = 180
FEATURE Selection	Topic Model	ML Model	Accuracy	Recall	Specificity	F1	Area Under Curve	Precision	MCC
TextNetTopic	GSDMM		0.851032	0.847525	0.854585	0.851366	0.903359	0.855447	0.702067																																		TNT (GSDMM)	0.851366
	PTM		0.856228	0.843423	0.869198	0.855144	0.912988	0.86736	0.712495																																		TNT (PTM)	0.855144
	BTM		0.856085	0.846535	0.865759	0.855452	0.906343	0.864667	0.712199																																		TNT (BTM)	0.855452
	SATM		0.852811	0.845403	0.860315	0.852519	0.906525	0.859858	0.705642																																		TNT (SATM)	0.852519
	WNTM		0.842633	0.832815	0.852579	0.841925	0.894492	0.85146	0.685297																																		TNT (WNTM)	0.841925
	GPM		0.848043	0.843847	0.852292	0.848249	0.902124	0.853067	0.696092																																		TNT (GPM)	0.848249
	GPU_PDMM		0.851174	0.844413	0.858023	0.850963	0.905895	0.857673	0.702366
	LFDMM		0.852669	0.844554	0.860888	0.852229	0.90494	0.860168	0.705361
XGBOOST		Adaboost	0.844342	0.846393	0.842264	0.845572	0.914389	0.846934	0.690485
		DT	0.831032	0.814993	0.847278	0.829175	0.854217	0.844336	0.662866
		LogitBoost	0.84669	0.833946	0.859599	0.845564	0.910844	0.858151	0.694177
		RF	0.85395	0.862801	0.844986	0.856049	0.915766	0.849622	0.70814
SKB		Adaboost	0.845552	0.85884	0.832092	0.839237	0.916859	0.848507	0.69194
		DT	0.820641	0.814851	0.826504	0.82683	0.84861	0.820625	0.641632
		LogitBoost	0.848256	0.857992	0.838395	0.843818	0.914262	0.850552	0.697065
		RF	0.849253	0.86662	0.831662	0.839492	0.917282	0.852673	0.699096
FCBF		Adaboost	0.535516	0.963649	0.101862	0.676368	0.480386	0.521539	#NUM!
		DT	0.503203	1	0	0.669508	0.460727	0.503203	#NUM!
		LogitBoost	0.535658	0.972984	0.0926934	0.678624	0.472295	0.521448	0.124371
		RF	0.508114	0.993352	0.0166189	0.670284	0.46079	0.506023	#NUM!
TNT (GSDMM)													0.848106
TNT (PTM)													0.845761
TNT (BTM)													0.846201
TNT (SATM)													0.841805
TNT (WNTM)													0.832452
TNT (GPM)													0.846192
XGB (Adaboost)								TNT(GPU_DMM)					0.84875
XGB (DT)								TNT(GPU_PDMM)					0.843705
XGB (LogitBoost)								TNT(LFDMM)					0.844608
XGB (RF)
SKB (Adaboost)
SKB (DT)
SKB (LogitBoost)
SKB (RF)
FCBF (Adaboost)
FCBF (DT)
FCBF (LogitBoost)
FCBF (RF)
					TW + TD	BW + TD	TW	TD
				GSDMM	0.898693	0.898505	0.851366	0.880916
				GPU_DMM	0.9033	0.906401	0.852305	0.8848
				GPU_PDMM	0.894349	0.890428	0.852305	0.882185
				LFDMM	0.891054	0.893042	0.853717	0.880987
				GPM	0.887541	0.897596	0.849781	0.840329
				BTM	0.901387	0.902582	0.855452	0.891417
				WNTM	0.858347	0.871215	0.843334	0.852441
				SATM	0.857481	0.864911	0.858503	0.808569
				PTM	0.894903	0.89716	0.860901	0.872776
[truncated: 36 more columns]

## Sheet: FL_CAMDA
													PM = TW+TD
	Model	Features	Accuracy	Sensitivity	Specifity	Precision	F-measure	Cohen's kappa		Reduction (Size)	PM-[BW+TD]		PM - TD	PM - TW
	BW	1292	0.869181	0.891796	0.846275	0.854591	0.872745	0.73828
GSDMM	TW + TD	193	0.89654	0.909944	0.882906	0.887872	0.898693	0.793019		0.852896	0.00018781		0.017777	0.047327
	BW + TD	1312	0.896512	0.910184	0.882665	0.887192	0.898505	0.792981
	TW	185	0.851032	0.847525	0.854585	0.855447	0.851366	0.702067
	TD	20	0.878672	0.889776	0.867379	0.872383	0.880916	0.757284
BTM	TW + TD	167	0.900424	0.902521	0.898291	0.900395	0.901387	0.800829		0.872713	-0.00119469		0.00997084	0.045935
	BW + TD	1312	0.902349	0.898868	0.905874	0.90641	0.902582	0.804699
	TW	182	0.856085	0.846535	0.865759	0.864667	0.855452	0.712199
	TD	20	0.890463	0.893777	0.887106	0.889329	0.891417	0.780909
PTM	TW + TD	254	0.893785	0.897059	0.890456	0.892857	0.894903	0.787547		0.806402	-0.0022568		0.0221273	0.0340029
	BW + TD	1312	0.896726	0.895191	0.898281	0.899201	0.89716	0.793449
	TW	257	0.860427	0.858699	0.862178	0.863342	0.860901	0.720853
	TD	20	0.873167	0.864639	0.881805	0.881174	0.872776	0.746355
SATM	TW + TD	245	0.857274	0.844818	0.869943	0.868644	0.857481	0.714595		0.813262	-0.00743023		0.0489121	-0.00102146
	BW + TD	1312	0.865623	0.855021	0.876361	0.875156	0.864911	0.731274
	TW	245	0.857153	0.861245	0.853009	0.855898	0.858503	0.714283
	TD	20	0.809253	0.800566	0.818052	0.800566	0.808569	0.618538
WNTM	TW + TD	155	0.857768	0.854902	0.860684	0.861912	0.858347	0.715537		0.88186	-0.0128681		0.00590595	0.015013
	BW + TD	1312	0.870391	0.871004	0.869771	0.871486	0.871215	0.740772
	TW	220	0.842705	0.841301	0.844126	0.845545	0.843334	0.685406
	TD	20	0.850989	0.853922	0.848006	0.851205	0.852441	0.701948
GPM	TW + TD	191	0.886723	0.886835	0.88661	0.888411	0.887541			0.854421	-0.0100542		0.0472127	0.0377599
	BW + TD	1312	0.897367	0.893777	0.901003	0.901536	0.897596	0.794736
	TW	220	0.849964	0.843281	0.856734	0.856766	0.849781	0.699945
	TD	20	0.844413	0.81372	0.875501	0.868859	0.840329	0.68894
GPU_DMM	TW + TD	160.7	0.9011	0.9167	0.8852	0.8905	0.9033	0.8021		0.877515	-0.00310139		0.0185	0.0509953
	BW + TD	1312	0.903843	0.925177	0.882235	0.888401	0.906401	0.807627
	TW	166	0.850249	0.85884	0.841547	0.845928	0.852305	0.700457
	TD	20	0.883	0.8915	0.8744	0.8784	0.8848	0.7659
GPU_PDMM	TW + TD	281	0.893644	0.892577	0.894729	0.896278	0.894349	0.787279		0.785823	0.00392084		0.0121641	0.0420439
	BW + TD	1312	0.890605	0.883593	0.897708	0.897463	0.890428	0.781223
	TW	276	0.850249	0.85884	0.841547	0.845928	0.852305	0.700457
	TD	20	0.881285	0.881653	0.880912	0.882899	0.882185	0.762557
LFDMM	TW + TD	201	0.890254	0.890336	0.890171	0.891871	0.891054	0.780497		0.846799	-0.00198845		0.0100665	0.0373361
	BW + TD	1312	0.892171	0.894625	0.889685	0.891536	0.893042	0.784328
	TW	191	0.853737	0.848373	0.859169	0.859283	0.853717	0.707485
	TD	20	0.879732	0.883193	0.876211	0.878961	0.880987	0.759437

## Sheet: Intersection_C
Original										Removed Duplicate
GSDMM	GPM	BTM	WNTM	SATM	PTM	GPU_DMM	GPU_PDMM	LFDMM		GSDMM	GPM	BTM	WNTM	SATM	PTM	GPU_DMM	GPU_PDMM	LFDMM			GSDMM	GPM	BTM	WNTM	SATM	PTM	GPU_DMM	GPU_PDMM	LFDMM
transplant	diseas	cancer	cell	care	health	hepat	us	transplant		transplant	diseas	cancer	cell	care	health	hepat	us	transplant		GSDMM	185	0.486486	0.8	0.805405	0.848649	0.918919	0.783784	0.92973	0.783784
patient	mutat	patient	factor	patient	care	acut	evalu	marrow		patient	mutat	patient	factor	patient	care	acut	evalu	marrow		GPM	0.439024	205	0.439024	0.429268	0.560976	0.556098	0.463415	0.546341	0.487805
leukemia	defici	cell	growth	health	medic	liver	analysi	cell		leukemia	defici	cell	growth	health	medic	liver	analysi	cell		BTM	0.762887	0.463918	194	0.850515	0.835052	0.902062	0.706186	0.891753	0.747423
acut	role	metastat	express	hospit	qualiti	associ	detect	bone		acut	role	metastat	express	hospit	qualiti	associ	detect	bone		WNTM	0.674208	0.39819	0.746606	221	0.737557	0.809955	0.647059	0.80543	0.642534
cell	tumor	breast	hepat	hypertens	hospit	hepatotox	studi	allogen		cell	tumor	breast	hepat	hypertens	hospit	hepatotox	studi	allogen		SATM	0.638211	0.46748	0.658537	0.662602	246	0.813008	0.601626	0.804878	0.634146
liver	famili	carcinoma	rat	studi	adult	cholestat	determin	cell		liver	famili	carcinoma	rat	studi	adult	cholestat	determin	patient		PTM	0.615942	0.413043	0.634058	0.648551	0.724638	276	0.572464	0.800725	0.615942
chronic	disord	advanc	human	coronari	program	report	method	patient		chronic	disord	advanc	human	coronari	program	report	method	liver		GPU_DMM	0.823864	0.539773	0.778409	0.8125	0.840909	0.897727	176	0.943182	0.789773
treatment	parkinson	treatment	protein	pulmonari	research	failur	develop	liver		treatment	parkinson	treatment	protein	pulmonari	research	failur	develop	stem		GPU_PDMM	0.623188	0.405797	0.626812	0.644928	0.717391	0.800725	0.601449	276	0.608696
studi	cycl	studi	activ	arteri	life	due	imag	stem		studi	cycl	studi	activ	arteri	life	due	imag	follow		LFDMM	0.687204	0.473934	0.687204	0.672986	0.739336	0.805687	0.658768	0.796209	211
diseas	associ	therapi	liver	liver	ag	caus	assess	follow		diseas	associ	therapi	liver	liver	ag	caus	assess	renal
bone	inactiv	phase	inhibit	medic	physician	induc	system	renal		bone	inactiv	phase	inhibit	medic	physician	induc	system	hematopoiet
hepat	era	prostat	regul	therapi	unit	toxic	model	hematopoiet		hepat	era	prostat	regul	therapi	unit	toxic	model	autolog
marrow	alzheim	tumor	hepatocyt	develop	impact	therapi	molecular	autolog		marrow	alzheim	tumor	hepatocyt	develop	impact	therapi	molecular	anemia
therapi	urea	trial	gene	vitamin	practic	sever	test	anemia		therapi	urea	trial	gene	vitamin	practic	sever	test	high-dose
myeloid	homozyg	factor	induc	report	medicin	injuri	base	transplant		myeloid	homozyg	factor	induc	report	medicin	injuri	base	leukemia
stem	variant	lung	receptor	primari	cost	fatal	magnet	high-dose		stem	variant	lung	receptor	primari	cost	fatal	magnet	treatment
lymphoblast	sequenc	colorect	tumor	hepat	myocardi	jaundic	diagnosi	leukemia		lymphoblast	sequenc	colorect	tumor	hepat	myocardi	jaundic	diagnosi	diseas
follow	osteoporosi	chemotherapi	signal	practic	commun	fulmin	predict	treatment		follow	osteoporosi	chemotherapi	signal	practic	commun	fulmin	predict	busulfan
toxic	gene	safeti	mice	famili	mortal	review	reson	diseas		toxic	gene	safeti	mice	famili	mortal	review	reson	effect
clinic	behaviour	efficaci	transform	intox	infarct	treatment	clinic	busulfan		clinic	behaviour	efficaci	transform	intox	infarct	treatment	clinic	rat
liver	cell	arthriti	review	effect	transplant	liver	patient	effect		oral	cell	arthriti	review	effect	transplant	drug	patient	chang
diseas	effect	patient	diseas	diseas	treatment	hepatotox	arthriti	rat		contracept	effect	rheumatoid	diseas	diseas	treatment	patient	arthriti	hepat
oral	hepat	rheumatoid	treatment	diabet	cell	drug	rheumatoid	chang		injuri	hepat	methotrex	treatment	diabet	cell	reaction	rheumatoid	protein
contracept	human	methotrex	systemat	patient	bone	hepat	treatment	hepat		associ	human	hepat	systemat	type	bone	studi	treatment	brain
injuri	activ	treatment	safeti	type	tuberculosi	patient	therapi	patient		drug-induc	activ	psoriasi	safeti	women	tuberculosi	drug-induc	therapi	growth
patient	rat	therapi	patient	women	marrow	reaction	methotrex	protein		hepatocellular	rat	liver	patient	prevent	marrow	syndrom	methotrex	insulin
hepat	liver	hepat	clinic	prevent	infect	injuri	primari	brain		carcinoma	liver	necrosi	clinic	risk	infect	advers	primari	plasma
associ	protein	safeti	efficaci	studi	stem	studi	psoriasi	growth		review	protein	long-term	efficaci	mortal	stem	clinic	psoriasi	metabol
therapi	express	studi	report	risk	recipi	drug-induc	hepatotox	insulin		report	express	psoriat	report	long-term	recipi	risk	hepatotox	activ
drug-induc	gene	psoriasi	effect	mortal	follow	syndrom	long-term	plasma		hyperplasia	receptor	clinic	effect	retrospect	follow	isoniazid	long-term	increas
hepatocellular	receptor	liver	disord	long-term	renal	advers	cirrhosi	metabol		long-term	viru	chronic	disord	mellitu	renal	effect	cirrhosi	defici
carcinoma	viru	necrosi	literatur	retrospect	tract	toxic	treat	activ		adenoma	factor	double-blind	literatur	postmenopaus	tract	hypersensit	treat	glucos
studi	factor	long-term	drug	mellitu	latent	associ	liver	increas		risk	respons	bile	drug	chronic	latent	viru	liver	human
treatment	respons	trial	meta-analysi	postmenopaus	immunosuppress	clinic	biliari	defici		arthriti	function	acid	meta-analysi	level	immunosuppress	infect	biliari	level
review	function	efficaci	bowel	chronic	high-dos	risk	sever	glucos		rheumatoid	patient	biliari	bowel	letter	high-dos	chronic	sever	respons
report	patient	factor	food	level	allogen	isoniazid	activ	human		methotrex	acid	primari	food	treat	allogen	antiretrovir	activ	serum
hyperplasia	acid	psoriat	oral	letter	urinari	treatment	toxic	level		hepatotox	mice	cirrhosi	oral	obes	urinari	safeti	toxic	express
long-term	mice	clinic	therapeut	treat	autolog	effect	diseas	liver		psoriasi	regul	syndrom	therapeut	leukemia	autolog	genotyp	diseas	mice
adenoma	regul	chronic	inflammatori	obes	hematopoiet	hypersensit	psoriat	respons		effect	studi	duct	inflammatori	trial	hematopoiet	trial	psoriat	receptor
risk	studi	double-blind	agent	leukemia	approv	acut	drug	serum		safeti	hepatotox	cholestasi	agent	safeti	approv	efficaci	drug	gene
patient	hepatotox	bile	women	trial	syndrom	hepat	diseas	cell		serum	report	intrahepat	women	treatment	syndrom	hiv	transplant	factor
arthriti	report	acid	cancer	safeti	hypersensit	patient	transplant	express		elev	erythromycin	ursodeoxychol	cancer	random	hypersensit	hcv	cell	signal
rheumatoid	erythromycin	biliari	risk	studi	liver	viru	liver	cell		drug	flutamid	associ	risk	efficaci	liver	reactiv	bone	hepatocyt
hepat	flutamid	primari	breast	treatment	associ	infect	patient	liver		advers	drug	effect	breast	phase	associ	treat	marrow	endotheli
liver	drug	cirrhosi	effect	random	toxic	therapi	cell	rat		reaction	agent	vanish	postmenopaus	double-blind	toxic	hypertens	renal	cancer
methotrex	agent	syndrom	postmenopaus	patient	cholestasi	chronic	bone	human		tuberculosi	herbal	children	hormon	placebo-control	cholestasi	double-blind	crohn	promot
treatment	herbal	duct	hormon	efficaci	hepatocellular	treatment	marrow	mice		event	relat	pseudolithiasi	random	control	hepatocellular	placebo-control	inflammatori	virus
therapi	relat	cholestasi	random	phase	bowel	antiretrovir	renal	receptor		isoniazid	due	cholesterol	weight	result	bowel	multipl	kidnei	infect
hepatotox	due	patient	weight	double-blind	therapi	liver	crohn	gene		infect	antifung	defect	undergo	clinic	therapi	random	parkinson	chronic
psoriasi	antifung	intrahepat	human	placebo-control	steroid	safeti	inflammatori	hepat		viru	fda	analysi	studi	randomis	steroid	sclerosi	bowel	immun
toxic	patient	ursodeoxychol	undergo	control	inflammatori	genotyp	kidnei	factor		genotyp	antimicrobi	us	highli	versu	inflammatori	oral	recipi	associ
effect	fda	associ	studi	result	acid	trial	parkinson	activ		reactiv	induc	human	obes	oral	acid	diabet	stem	antigen
safeti	antimicrobi	effect	highli	clinic	intrahepat	efficaci	bowel	activ		antiretrovir	sulfat	evalu	therapi	open-label	intrahepat	control	chronic	detect
studi	induc	therapi	obes	randomis	diseas	hiv	recipi	growth		hcv	acetaminophen	detect	control	multicent	diseas	long-term	veno-occlus	mutat
chronic	sulfat	vanish	factor	diseas	carcinoma	hcv	stem	signal		ribavirin	antibacteri	determin	bone	children	carcinoma	pulmonari	azathioprin	primari
diseas	associ	treatment	therapi	versu	stevens-johnson	reactiv	therapi	protein		treat	isoniazid	rat	result	acut	stevens-johnson	type	alzheim	type
serum	acetaminophen	children	control	oral	valproic	studi	chronic	hepatocyt		trial	acut	activ	trial	poison	valproic	cell	effect	novel
long-term	acid	pseudolithiasi	bone	effect	dress	hepatotox	veno-occlus	endotheli		sofosbuvir	toxic	protein	compar	acid	dress	human	function	risk
elev	antibacteri	cholesterol	safeti	open-label	bile	associ	azathioprin	cancer		lymphoma	cholestat	method	versu	syndrom	bile	rat	level	acut
clinic	isoniazid	defect	result	multicent	hyperplasia	treat	alzheim	promot		plu	injuri	function	multicent	iron	hyperplasia	express	serum	diabet
hepatotox	hepat	studi	safeti	children	cancer	treatment	effect	hepat		activ	jaundic	plasma	combin	symptom	cancer	activ	elev	women
drug	liver	analysi	efficaci	treatment	patient	patient	function	virus		us	therapi	imag	type	caus	patient	protein	enzym	coronari
advers	acut	liver	patient	acut	breast	trial	level	infect		determin	syndrom	diseas	toler	experi	breast	growth	women	myocardi
reaction	associ	us	treatment	studi	metastat	safeti	liver	express		novel	caus	risk	diabet	administr	metastat	factor	concentr	cardiovascular
treatment	induc	human	studi	effect	advanc	studi	serum	cell		human	fatal	diabet	evalu	prospect	advanc	hepatocyt	chang	heart
review	report	clinic	trial	clinic	lung	efficaci	elev	human		acid	sever	women	arthriti	assess	lung	receptor	blood	cardiac
hepat	toxic	evalu	random	leukemia	treatment	hypertens	enzym	protein		evalu	cholestasi	level	rheumatoid	serum	prostat	regul	plasma	therapi
liver	cholestat	acid	compar	poison	therapi	double-blind	women	chronic		method	failur	type	methotrex	life	chemotherapi	cancer	metabol	manag
patient	drug	effect	oral	acid	prostat	effect	concentr	immun		detect	treatment	serum	psoriasi	disord	colorect	inhibit	children	mellitus
tuberculosi	injuri	detect	clinic	syndrom	carcinoma	placebo-control	chang	associ		molecular	safeti	metabol	necrosi	injuri	tumor	signal	normal	outcom
associ	jaundic	determin	versu	iron	chemotherapi	multipl	blood	respons		character	trial	coronari	antibodi	adult	phase	tumor	postmenopaus	age
effect	due	rat	therapi	long-term	colorect	random	plasma	gene		structur	cancer	postmenopaus	psoriat	infect	melanoma	mice	dose	comparison
report	therapi	activ	control	symptom	tumor	sclerosi	metabol	antigen		system	efficaci	mellitu	long-term	unit	treat	gene	impair	phase
clinic	syndrom	protein	multicent	caus	phase	clinic	children	detect		analysi	clinic	viru	monoclon	cohort	non-small-cel	transplant	hormon	studi
risk	caus	cell	effect	experi	cell	oral	normal	mutat		protein	control	gene	chronic	test	malign	diseas	hepat	refractori
event	hepatotox	method	combin	administr	melanoma	diabet	test	primari		develop	random	express	respons	comparison	local	coronari	viru	lymphoma
studi	fatal	function	type	prospect	treat	control	postmenopaus	type		properti	phase	respons	health	enzym	hepat	renal	infect	relaps
isoniazid	sever	plasma	toler	assess	non-small-cel	long-term	dose	gene		hypertens	term	immun	care	associ	viru	heart	genotyp	myeloid
injuri	cholestasi	imag	diabet	serum	malign	pulmonari	impair	effect		arteri	oral	antigen	children	incid	chronic	outcom	reactiv	lymphoblast
infect	failur	diseas	evalu	life	local	type	hormon	novel		pulmonari	blind	infect	adult	transplant	leukemia	marrow	human	myeloma
hepat	patient	effect	arthriti	patient	hepat	cell	hepat	risk		coronari	result	dna	analysi	failur	acut	bone	antiretrovir	multipl
patient	treatment	patient	rheumatoid	liver	viru	liver	viru	acut		outcom	long	antibodi	qualiti	renal	genotyp	contracept	respons	trial
viru	studi	risk	patient	disord	chronic	human	patient	diabet		heart	diabet	replic	medic	outcom	hcv	hepatocellular	immunodefici	lymphocyt
infect	safeti	diseas	methotrex	studi	patient	rat	infect	women		syndrom	letter	randomis	nation	bone	antivir	literatur	viral	t-cell
therapi	trial	diabet	therapi	therapi	infect	express	chronic	patient		portal	plan	versu	practic	follow	myeloid	cholestasi	hiv	approv
chronic	cancer	women	treatment	effect	leukemia	activ	therapi	coronari		blood	paediatr	plu	hospit	heart	viral	steroid	hcv	safeti
treatment	efficaci	studi	psoriasi	injuri	acut	hepat	genotyp	myocardi		failur	dermat	open-label	research	marrow	ribavirin	acid	replic	oral
genotyp	clinic	level	necrosi	adult	genotyp	protein	reactiv	diseas		cardiac	channel	random	data	toxic	lymphocyt	metabol	interferon	contracept
reactiv	control	factor	activ	clinic	treatment	growth	human	cardiovascular		pressur	infect	non-small-cel	us	anemia	interferon	oxid	antivir	report
antiretrovir	diseas	associ	antibodi	infect	hcv	factor	antiretrovir	type		factor	sclerosi	first-lin	novel	cell	sofosbuvir	increas	leukemia	syndrom
hcv	random	type	psoriat	unit	therapi	hepatocyt	respons	treatment		women	degener	multicentr	determin	human	lymphoblast	bile	multipl	hepatocellular
ribavirin	effect	serum	safeti	cohort	antivir	receptor	treat	heart		ag	spectrum	iii	method	receptor	hepatotox	function	lymphoma	carcinoma
treat	therapi	plasma	factor	test	myeloid	regul	immunodefici	cardiac		cancer	macular	control	vitro	express	injuri	brain	acut	review
safeti	phase	hepat	hepat	comparison	viral	cancer	viral	therapi		mortal	rel	genotyp	detect	factor	drug	level	sclerosi	injuri
studi	term	metabol	liver	control	ribavirin	effect	hiv	factor		children	age	ribavirin	molecular	respons	drug-induc	normal	relaps	literatur
liver	oral	coronari	long-term	enzym	lymphocyt	inhibit	hcv	manag		cardiovascular	neovascular	hcv	dna	gene	acetaminophen	neuron	refractori	adenoma
trial	blind	postmenopaus	monoclon	associ	interferon	signal	activ	mellitus		function	sodium	treat	isol	rat	damag	herbal	myeloid	benign
sofosbuvir	result	therapi	clinic	treat	sofosbuvir	tumor	replic	outcom		level	contracept	sofosbuvir	potenti	activ	relat	acetaminophen	lymphocyt	tumor
lymphoma	long	liver	chronic	result	lymphoblast	mice	interferon	age		adult	administr	reactiv	ronari	growth	sever	poison	myeloma	hyperplasia
plu	diabet	mellitu	respons	incid	treat	gene	antivir	comparison		influenc	review	interferon	heart	induc	elev	overdos	lymphoblast	hepatotox
activ	letter	hepat	studi	diseas	liver	transplant	leukemia	leukemia		chang	tuberculosi	antivir	acut	protein	dose	intox	chemotherapi	advers
effect	plan	viru	health	liver	hepatotox	patient	multipl	patient		rat	us	placebo-control	myocardi	hepatocyt	isoniazid	supplement	non-hodgkin	clinic
studi	isoniazid	cell	patient	transplant	injuri	diseas	patient	phase		bile	global	disord	infarct	mice	caus	iron	b-cell	drug
us	paediatr	human	care	acut	toxic	acut	lymphoma	acut		metabol	approv	result	failur	inhibit	overdos	fibrosi	t-cell	therapeut
determin	dermat	gene	clinic	failur	patient	effect	acut	studi		oxid	allerg	oral	predict	regul	administr	versu	review	isoniazid
novel	channel	express	diseas	patient	drug	cell	chronic	treatment		receptor	vitamin	acut	mortal	role	trial	children	report	analysi
human	treatment	protein	children	renal	drug-induc	coronari	sclerosi	refractori		hepatocyt	intak	multipl	outcom	live	random	compar	literatur	tuberculosi
acid	associ	activ	effect	outcom	diseas	treatment	relaps	lymphoma		mice	individu	toler	cardiac	ell	control	mutat	systemat	reaction
evalu	hepat	respons	risk	syndrom	acetaminophen	studi	refractori	chronic		format	safe	transplant	cardiovascular	carcinoma	clinic	analysi	poison	antifung
method	syndrom	liver	adult	bone	damag	liver	treatment	relaps		increas	recommend	marrow	arteri	contracept	studi	primari	acetaminophen	efficaci
detect	therapi	immun	analysi	chronic	treat	renal	myeloid	myeloid		membran	alfa	bone	ventricular	tumor	comparison	biliari	iron	children
molecular	infect	antigen	qualiti	follow	relat	hepat	lymphocyt	lymphoblast		random	methotrex	stem	sever	function	effect	defici	herbal	retrospect
character	sever	infect	medic	heart	transplant	clinic	myeloma	myeloma		control	hypersensit	renal	function	hepatocellular	disord	genet	adult	random
cell	cell	associ	control	marrow	sever	trial	lymphoblast	multipl		diabet	manag	autolog	leukemia	inhibitor	oral	cirrhosi	associ	doubl-blind
structur	acut	diseas	nation	toxic	elev	heart	chemotherapi	therapi		type	updat	hematopoiet	lymphoma	necrosi	result	molecular	intox	placebo-control
system	fatal	patient	practic	anemia	dose	outcom	therapi	trial		prevent	dog	high-dos	relaps	pharmacokinet	compar	famili	manag	result
analysi	drug	dna	hospit	risk	isoniazid	failur	treat	lymphocyt		compar	dress	recipi	refractori	hyperplasia	diabet	women	supplement	versus
protein	phase	antibodi	research	administr	caus	marrow	non-hodgkin	t-cell		efficaci	constip	follow	phase	steroid	toler	postmenopaus	meta-analysi	control
develop	herbal	factor	evalu	treat	overdos	therapi	b-cell	approv		result	period	allogen	myeloid	adenoma	prevent	mortal	overdos	multicent
properti	sclerosi	replic	data	children	administr	bone	t-cell	safeti		mellitu	surfac	busulfan	multipl	stem	type	obes	vitamin	randomis
patient	degener	phase	analysi	cell	treatment	hepat	review	liver		double-blind	epilepsi	failur	lymphocyt	ag	multipl	hormon	care	long-term
effect	spectrum	trial	gene	human	trial	liver	report	oral		express	anticonvuls	health	lymphoblast	jaundic	sclerosi	cardiovascular	health	toler
hypertens	macular	patient	us	hepat	random	oral	hepatotox	contracept		growth	bowel	care	b-cell	cholestasi	crohn	arthriti	medic	cholestat
diseas	rel	cancer	human	receptor	control	therapi	literatur	hepat		regul	phenytoin	adult	rituximab	due	parkinson	rheumatoid	hospit	failur
arteri	age	studi	cell	express	clinic	contracept	systemat	report		induc	secondari	medic	leukaemia	cholestat	myeloma	methotrex	qualiti	caus
pulmonari	neovascular	advanc	novel	liver	studi	report	acut	associ		inhibit	screen	qualiti	myeloma	intrahepat	steatohepat	psoriasi	unit	due
acut	sodium	randomis	studi	factor	comparison	associ	poison	syndrom		gene	vascular	hospit	imatinib	prolong	relaps	pseudolithiasi	experi	induc
coronari	oral	versu	clinic	respons	therapi	patient	acetaminophen	hepatocellular		signal	common	outcom	reactiv	drug	nonalcohol	system	life	jaundic
outcom	diseas	lung	activ	gene	effect	syndrom	iron	carcinoma		tumor	week	unit	acid	bile	alzheim	copper	practic	fatal
chronic	studi	plu	protein	rat	disord	treatment	herbal	therapi		pharmacokinet	pharmacodynam	assess	biliari	duct	falciparum	manag	program	fulmin
heart	contracept	treatment	evalu	activ	dose	review	adult	review		toler	disabl	review	bile	black	isol	us	research	sever
syndrom	clinic	metastat	express	growth	oral	jaundic	associ	injuri		profil	asthma	drug	metabol	pregnanc	cholesterol	determin	survei	pulmonari
portal	therapi	open-label	determin	induc	adult	acut	intox	diseas		experi	poison	advers	cirrhosi	dress	us	evalu	physician	hypertens
long-term	hepatotox	random	method	protein	result	hepatotox	manag	literatur		systemat	acidosi	hepatotox	primari	bowel	determin	novel	impact	sclerosi
blood	cancer	non-small-cel	vitro	hepatocyt	compar	hepatocellular	supplement	adenoma		placebo-control	lactic	tuberculosi	plasma	chlorpromazin	lipid	detect	cost	parkinson
failur	administr	first-lin	detect	mice	diabet	literatur	meta-analysi	benign		phase	children	report	level	rifampicin	evalu	structur	nation	use
treatment	associ	double-blind	molecular	inhibit	toler	cholestasi	overdos	tumor		randomis	propofol	systemat	normal	viru	metabol	vitro	safeti	molecular
cardiac	review	multicentr	dna	regul	acut	steroid	toxic	contracept		versu	analysi	event	cholesterol	genotyp	serum	method	advers	develop
studi	tuberculosi	iii	isol	acid	prevent	cholestat	dose	hyperplasia		multicent	comparison	reaction	fatti	cirrhosi	method	isol	reaction	determin
pressur	us	control	potenti	role	type	cancer	vitamin	cancer		multipl	leukemia	contracept	associ	ribavirin	agent	character	efficaci	character
risk	global	hepat	patient	oral	diseas	rat	care	hepatotox		respons	type	hypertens	hepatotox	hcv	defici	deriv	pharmacokinet	imag
diseas	approv	patient	diseas	live	multipl	effect	health	advers		antigen	risk	fibrosi	syndrom	interferon	vivo	synthesi	profil	magnet
studi	allerg	viru	ronari	ell	patient	liver	medic	treatment		immun	medicin	portal	due	plu	properti	imag	inhibitor	tissu
factor	vitamin	infect	heart	carcinoma	sclerosi	acid	children	safeti		replic	antagonist	bowel	caus	fibrosi	fatti	carcinoma	event	dna
effect	intak	chronic	acut	contracept	carcinoma	activ	hospit	review		antibodi	analog	hyperplasia	fatal	sofosbuvir	mass	surgeri	therapeut	potenti
associ	individu	genotyp	myocardi	tumor	treatment	patient	qualiti	clinic		viral	nucleosid	inflammatori	toxic	combin	arthriti	arteri	agent	distribut
patient	safe	ribavirin	infarct	function	cell	diseas	adult	drug		immunodefici	adult	hepatocellular	cholestat	dna	rheumatoid	diagnosi	toler	function
women	recommend	therapi	failur	hepatocellular	crohn	receptor	unit	infect		cholestat	product	nodular	injuri	cholang	methotrex	breast	rat	evalu
ag	alfa	hcv	result	factor	parkinson	metabol	clinic	therapeut		caus	treat	toxic	advanc	evalu	psoriasi	colorect	acid	health
cancer	acut	safeti	predict	inhibitor	myeloma	cell	experi	hepat		due	inhibit	literatur	metastat	analysi	hypertens	result	bile	care
mortal	cancer	treat	mortal	associ	therapi	oxid	life	drug		sever	select	acetaminophen	lung	us	fibrosi	phase	oxid	medic
children	factor	sofosbuvir	effect	necrosi	advanc	increas	practic	isoniazid		jaundic	sensit	sever	randomis	manag	pulmonari	toler	protein	unit
cardiovascular	liver	treatment	outcom	pharmacokinet	oral	bile	effect	analysi		fatal	health	poison	first-lin	review	long-term	advanc	brain	life
function	trial	reactiv	cardiac	hyperplasia	renal	protein	program	tuberculosi		breast	care	hypersensit	non-small-cel	meta-analysi	psoriat	metastat	role	impact
coronari	associ	plu	cardiovascular	steroid	steatohepat	function	research	reaction		chemotherapi	medic	system	carcinoma	toler	portal	leukemia	membran	practic
heart	clinic	trial	arteri	adenoma	relaps	brain	survei	antifung		imag	unit	fatal	open-label	approach	idiopath	lung	mechan	qualiti
level	methotrex	interferon	ventricular	risk	nonalcohol	human	physician	patient		colorect	physician	injuri	plu	data	arteri	lymphoma	mice	evid
adult	efficaci	cirrhosi	sever	stem	hepatocellular	level	impact	efficaci		metastat	hospit	cholestat	treat	systemat	necrosi	chemotherapi	receptor	experi
influenc	studi	antivir	function	transplant	alzheim	normal	cost	children		advanc	evalu	due	infect	biliari	safeti	refractori	transport	popul
chang	drug	phase	risk	ag	falciparum	neuron	nation	retrospect		lung	qualiti	induc	viru	model	efficaci	health	isol	acidosi
rat	syndrom	safeti	patient	syndrom	acid	hepatotox	drug	safeti		prostat	practic	caus	genotyp	myocardi	double-blind	care	cholesterol	lactic
effect	hypersensit	treatment	leukemia	jaundic	studi	acut	safeti	treatment		health	develop	fulmin	antiretrovir	improv	placebo-control	medic	neuron	portal
liver	manag	studi	chronic	cholestasi	bile	hepat	clinic	efficaci		care	essenti	receptor	ribavirin	infarct	versu	hospit	hepatocyt	immunodefici
acid	updat	efficaci	acut	due	effect	liver	effect	studi		medic	sarcoma	growth	inhibitor	increas	randomis	qualiti	cancer	propofol
cell	dog	trial	lymphoma	cholestat	isol	review	advers	patient		qualiti	ventil	hepatocyt	hcv	immun	open-label	physician	carcinoma	infus
bile	dress	random	relaps	intrahepat	cholesterol	herbal	treatment	random		unit	divers	inhibit	treatment-na	implic	multicent	adult	advanc	antiretrovir
metabol	constip	double-blind	refractori	prolong	us	report	reaction	trial		hospit	gamma	regul	proteas	behavior	combin	practic	breast	bowel
oxid	period	placebo-control	phase	drug	determin	acetaminophen	efficaci	doubl-blind		practic	cerebr	oxid	hiv-infect	lymphocyt	multicentr	unit	metastat	arthriti
receptor	surfac	patient	myeloid	bile	lipid	associ	review	placebo-control		physician	low	role	double-blind	evid	failur	impact	lung	rheumatoid
activ	epilepsi	clinic	multipl	duct	evalu	toxic	pharmacokinet	clinic		program	test	mice	placebo-control	exposur	report	program	prostat	methotrex
hepat	anticonvuls	disord	treatment	treatment	metabol	failur	profil	result		life	fulmin	antiretrovir	iii	mechan	due	respons	tumor	toxic
hepatocyt	bowel	result	lymphocyt	black	serum	poison	inhibitor	phase		impact	dysfunct	immunodefici	pool	arthriti	induc	immun	colorect	psoriasi
protein	phenytoin	oral	lymphoblast	acid	method	overdos	event	versus		assess	overdos	hiv	tuberculosi	rheumatoid	cholestat	antigen	hepatocellular	treat
mice	secondari	effect	b-cell	pregnanc	agent	intox	manag	control		mutat	amiodaron	hiv-infect	elev	methotrex	fatal	replic	non-small-cel	poison
chang	screen	phase	rituximab	dress	defici	supplement	evalu	oral		primari	encephalopathi	acidosi	isoniazid	psoriasi	jaundic	dna	plu	acetaminophen
function	vascular	control	leukaemia	bowel	vivo	clinic	therapeut	multicent		biliari	pancreat	arteri	enzym	hepatotox	fulmin	viral	surviv	drug-induc
human	common	acut	studi	acut	comparison	safeti	agent	randomis		cirrhosi	enzym	heart	receiv	sever	poison		syndrom	herbal
format	week	multipl	myeloma	chlorpromazin	properti	iron	toler	long-term		polymorph	autoimmun	surgeri	advers	profil	autoimmun		cholestasi	intox
increas	pharmacodynam	toler	imatinib	report	fatti	injuri	experi	toler		genet	transplant	myocardi	colorect	low	intox		hypersensit	iron
membran	disabl	infect	reactiv	rifampicin	mass	treatment	system	therapi		identif	literatur	pulmonari	contracept	psoriat	children		intrahepat	overdos
trial	asthma	transplant	acid	hepat	arthriti	treatment	rat	hepat		hypersensit	advers	infarct	fibrosi	juvenil	review		acidosi	advanc
random	poison	cell	liver	patient	rheumatoid	patient	acid	acut		poison	arthriti	prevent	chemotherapi	receiv	literatur		lactic	metastat
studi	acidosi	liver	rat	viru	patient	safeti	effect	liver		acetaminophen	rheumatoid	leukemia	hepatocellular	dose	advers		duct	breast
patient	lactic	marrow	biliari	chronic	methotrex	studi	bile	hepatotox		acidosi	reaction	lymphoma	hyperplasia	advers	systemat		follow	lung
effect	children	bone	patient	infect	treatment	trial	oxid	report		iron	abort	refractori	system	reaction	contracept		stevens-johnson	chemotherapi
control	patient	diseas	bile	genotyp	psoriasi	infect	protein	cholestat			revisit	relaps	reaction	system	reaction		due	prostat
diabet	trial	stem	metabol	cirrhosi	hypertens	efficaci	metabol	hepat			atyp	myeloid	drug-induc	hypersensit	event		dress	open-label
treatment	hepatotox	patient	effect	therapi	therapi	random	brain	associ			blood	lymphoblast	hypersensit	drug-induc	meta-analysi		risk	hypersensit
type	therapi	renal	cirrhosi	ribavirin	fibrosi	clinic	role	patient			cortic	lymphocyt	symptom	medicin	therapeut		diabet	steven-johnson
prevent	acut	studi	primari	hcv	pulmonari	therapi	model	therapi			issu	leukaemia	organ	autoimmun	manag		type	epiderm
therapi	viru	hepat	plasma	activ	chronic	effect	membran	failur			tool	b-cell	databas	genet	asses		factor	necrolysi
clinic	propofol	autolog	level	primari	liver	double-blind	activ	caus			follow	myeloma	event	event	heart		cohort	dress
safeti	analysi	hematopoiet	diabet	interferon	hepat	control	mechan	treatment			chronic	multicent	transplant	fulmin	coronari		incid	pseudolithiasi
compar	report	high-dos	diseas	plu	long-term	fibrosi	mice	due			inhibitor	compar	marrow	fatal	obes		mellitu	biliari
efficaci	diabet	recipi	hepatocyt	fibrosi	psoriat	pulmonari	receptor	induc			aid		stem	damag	cardiac		cardiovascular	ceftriaxon
result	comparison	follow	type	sofosbuvir	portal	versu	transport	jaundic			ceftriaxon		follow	relat	infant		outcom	bile
women	leukemia	allogen	normal	treat	treat	diseas	isol	fatal			revers		hematopoiet	potenti	surgeri		death	genotyp
mellitu	type	busulfan	cholesterol	combin	idiopath	children	cholesterol	review			progress		allogen	isol	approach		popul	reactiv
double-blind	risk	failur	human	dna	arteri	review	neuron	fulmin			demonstr		autolog	plasma	genet		prospect	ribavirin
diseas	induc	treatment	fatti	cholang	necrosi	compar	hepatocyt	sever			pump		high-dos	chang	adolesc		retrospect	hcv
cell	medicin	studi	hepat	safeti	safeti	gene	cancer	patient			List		busulfan	vitro	relationship		preval	sofosbuvir
liver	antagonist	patient	acut	clinic	efficaci	mutat	carcinoma	trial			String		recipi	molecular	role		trial	antivir
factor	analog	health	liver	evalu	studi	cell	advanc	diseas			as		veno-occlus	antibodi	function		random	surgeri
activ	nucleosid	care	report	efficaci	trial	express	patient	studi			hiv		condit	oxid	influenc		phase	colorect
human	therapi	effect	failur	risk	patient	diseas	breast	treatment			lymphoma		cyclophosphamid	agent	monitor		double-blind	acid
express	cell	diseas	associ	analysi	phase	patient	metastat	safeti					immunodefici	detect	activ		result	diagnosi
growth	effect	clinic	hepatotox	us	double-blind	human	lung	efficaci					antigen	literatur	respons		control	venous
hepat	human	risk	syndrom	manag	random	cancer	cell	random					replic	therapeut	develop		placebo-control	screen
regul	studi	adult	therapi	adult	placebo-control	associ	prostat	pulmonari					viral	supplement	inhibitor		versu	metastas
rat	induc	children	due	review	versu	protein	tumor	multipl					immun	acetaminophen	system		randomis	thrombosi
protein	adult	medic	caus	factor	result	syndrom	therapi	doubl-blind					rna	intraven	resist		oral	hip
receptor	respons	analysi	fatal	trial	randomis	analysi	colorect	hypertens					oxid	herbal	select		multicent
effect	product	qualiti	toxic	experi	long-term	primari	chemotherapi	sclerosi					hypertens	dietari	tissu		compar
hepatocyt	hepatotox	treatment	sever	assess	open-label	biliari	hepatocellular	placebo-control					blood	acidosi	antibodi		open-label
mice	review	control	treatment	meta-analysi	treatment	defici	treat	clinic					pulmonari	erythromycin	evid		injuri
induc	treat	hospit	review	toler	multicent	genet	treatment	long-term					brain	lactic	hormon		failur
inhibit	inhibit	cancer	induc	approach	combin	cirrhosi	non-small-cel	control					nitric	multipl	primari		caus
gene	select	outcom	cholestat	combin	evalu	molecular	renal	parkinson					neuron	sclerosi	famili		induc
signal	sensit	unit	injuri	data	multicentr	activ	plu	liver					increas	tuberculosi	novel		cholestat
tumor	gene	assess	patient	systemat	toler	famili	surviv	randomis					improv	isoniazid	surviv		drug-induc
safeti	health	treatment	cancer	primari	hepat	studi	syndrom	use					pressur	relaps	express		fulmin
efficaci	care	review	patient	biliari	acut	risk	associ	analysi						compar	human		contracept
treatment	studi	patient	advanc	effect	associ	effect	cholestasi	molecular						complic	protein		jaundic
patient	effect	drug	metastat	model	failur	women	hypersensit	human						myeloma	factor		express
studi	medic	advers	phase	myocardi	report	diseas	therapi	develop						preval	receptor		growth
review	children	hepatotox	lung	improv	due	patient	intrahepat	determin						novel	growth		regul
clinic	patient	clinic	treatment	cirrhosi	induc	cancer	treatment	novel						infant	inhibit		inhibit
long-term	risk	safeti	studi	role	therapi	treatment	report	character						network	hepatocyt		gene
effect	clinic	hepat	versu	infarct	cholestat	associ	acid	imag						global	regul		signal
evalu	unit	infect	breast	increas	caus	factor	acidosi	clinic						progress	mice		promot
diseas	physician	tuberculosi	randomis	caus	treatment	human	bile	protein						cancer	rat		disord
therapi	adult	report	cell	assess	fatal	postmenopaus	toxic	magnet						breast	gene		mutat
pharmacokinet	hospit	systemat	trial	immun	jaundic	trial	children	cell						advanc	signal		genet
toler	evalu	effect	first-lin	implic	sever	mortal	lactic	studi						metastat	biliari		polymorph
profil	diseas	event	non-small-cel	behavior	fulmin	diabet	duct	tissu						lung	model		famili
experi	qualiti	reaction	carcinoma	lymphocyt	follow	obes	follow	dna						prostat	vitro		novel
infect	analysi	efficaci	open-label	evid	poison	hormon	stevens-johnson	potenti						chemotherapi	character		depress
drug	practic	associ	plu	exposur	autoimmun	random	sever	distribut						colorect	oxid		character
systemat	drug	diseas	treat	mechan	intox	level	due	function						recurr	cirrhosi		major
children	develop	analysi	safeti	function	children	cardiovascular	dress	evalu						mutat	analysi		defici
trial	essenti	liver	patient	arthriti	review	patient	studi	health						lymphoma	mechan		structur
safeti	sarcoma	diseas	hepat	rheumatoid	report	hepat	risk	studi						reactiv	molecular		identif
studi	ventil	oral	infect	patient	literatur	liver	diabet	care						antigen	interact		tuberculosi
random	divers	patient	viru	methotrex	oral	diseas	type	patient						immunodefici	structur		prevent
efficaci	gamma	contracept	genotyp	liver	advers	arthriti	factor	children						hiv	membran		complic
patient	cerebr	hepat	chronic	toxic	systemat	therapi	patient	review						antivir	antigen		surgeri
treatment	effect	studi	therapi	psoriasi	safeti	treatment	diseas	analysi							potenti		author
double-blind	injuri	treatment	antiretrovir	hepat	contracept	rheumatoid	associ	clinic							chang		latent
placebo-control	trial	associ	ribavirin	treatment	drug	hepatotox	women	medic							level		tract
phase	therapi	therapi	plu	long-term	reaction	methotrex	analysi	unit							plasma		venou
result	low	hypertens	safeti	hepatotox	treatment	acut	cohort	women							blood		transl
clinic	random	fibrosi	inhibitor	sever	hepat	chronic	incid	life							increas		isoniazid
control	efficaci	chronic	hcv	profil	event	psoriasi	mellitu	impact							normal		total
randomis	control	portal	treatment-na	treat	effect	associ	cardiovascular	practic							concentr		malaria
versu	syndrom	bowel	treatment	low	meta-analysi	treat	outcom	risk							applic		pain
oral	function	hyperplasia	phase	syndrom	efficaci	effect	death	qualiti							imag		regimen
multicent	test	inflammatori	treat	psoriat	clinic	report	popul	evid							mellitu		intraven
multipl	report	long-term	proteas	juvenil	therapeut	clinic	prospect	experi							insulin		antibodi
diseas	comparison	hepatocellular	hiv-infect	receiv	agent	infect	retrospect	factor							lymphoma		vitro
compar	drug	nodular	combin	dose	manag	viru	preval	popul							antiretrovir		necrosi
hepat	hepat	syndrom	random	drug	children	poison	studi	syndrom							reactiv		antigen
viru	acut	acut	double-blind	hepatotox	asses	children	trial	diseas							hiv		monoclon
cell	failur	hepat	trial	advers	heart	acut	safeti	acidosi							immunodefici		recombin
human	liver	report	placebo-control	reaction	coronari	report	efficaci	liver							acidosi		deriv
infect	fulmin	associ	patient	system	chronic	infect	patient	therapi							hiv-infect		antagonist
protein	caus	review	phase	toxic	syndrom	patient	treatment	lactic							rituximab		bind
respons	acetaminophen	liver	safeti	treatment	acut	studi	random	patient							lactic		hypertens
activ	dysfunct	hepatotox	result	review	obes	associ	phase	treatment							regimen		arteri
antigen	hepatotox	toxic	studi	hypersensit	cardiac	hepat	clinic	associ							risk		coronari
immun	overdos	failur	randomis	drug-induc	infant	viru	double-blind	patient							outcom		pulmonari
replic	toxic	literatur	treatment	syndrom	surgeri	pseudolithiasi	result	portal							women		heart
patient	amiodaron	drug	efficaci	studi	disord	diseas	control	acut							experi		fibrosi
liver	encephalopathi	acetaminophen	control	induc	approach	syndrom	placebo-control	immunodefici							incid		myocardi
antibodi	associ	sever	iii	chronic	genet	system	versu	hypertens							prospect		portal
chronic	pancreat	poison	multicent	medicin	adolesc	copper	randomis	propofol							cohort		cardiac
express	enzym	hypersensit	clinic	medic	relationship	factor	long-term	hepatotox							popul		infarct
inhibit	autoimmun	treatment	analysi	autoimmun	role	effect	oral	review
induc	transplant	system	diseas	injuri	function	review	multicent	infus
viral	patient	risk	pool	genet	influenc	caus	compar	antiretrovir
immunodefici	flutamid	fatal	open-label	event	monitor	manag	open-label	bowel
hepat	review	hepat	liver	hepat	effect	effect	hepat	patient
acut	effect	liver	patient	acut	activ	activ	liver	liver
liver	hepatotox	acut	risk	liver	respons	us	acut	arthriti
hepatotox	liver	associ	hepatotox	failur	develop	studi	associ	rheumatoid
associ	treatment	therapi	tuberculosi	associ	inhibitor	determin	injuri	therapi
report	report	patient	treatment	caus	associ	molecular	failur	methotrex
failur	contracept	injuri	hepat	injuri	system	evalu	toxic	hepatotox
cholestat	oral	failur	diseas	induc	resist	acid	hepatotox	treatment
caus	literatur	report	elev	report	select	protein	caus	diseas
due	advers	hepatotox	isoniazid	cholestat	tissu	novel	induc	hepat
therapi	arthriti	sever	associ	due	antibodi	detect	sever	effect
induc	rheumatoid	cholestat	effect	fulmin	evid	analysi	cholestat	toxic
sever	syndrom	due	enzym	sever	hormon	structur	report	long-term
toxic	hepat	induc	factor	fatal	primari	human	therapi	psoriasi
injuri	methotrex	caus	receiv	damag	control	vitro	due	studi
jaundic	reaction	treatment	injuri	administr	famili	method	oral	advers
review	patient	toxic	infect	relat	novel	isol	drug-induc	treat
treatment	clinic	follow	sever	drug-induc	drug	character	fulmin	associ
fatal	therapi	fatal	treat	transplant	diseas	deriv	contracept	risk
patient	toxic	fulmin	advers	cell	surviv	synthesi	jaundic	function
cancer	abort	cell	patient	effect	cell	patient	cell	liver
patient	revisit	rat	liver	activ	liver	cancer	activ	acut
breast	atyp	liver	therapi	rat	hepat	studi	express	injuri
treatment	blood	activ	cancer	protein	express	clinic	factor	hepatotox
liver	regul	effect	diseas	studi	human	liver	human	failur
therapi	cortic	receptor	hepat	function	protein	treatment	liver	poison
chemotherapi	issu	growth	treatment	analysi	factor	imag	growth	review
imag	tool	factor	colorect	potenti	receptor	therapi	rat	hepat
hepat	treatment	human	oral	level	growth	carcinoma	regul	associ
diseas	effect	hepat	studi	isol	inhibit	analysi	mice	acetaminophen
carcinoma	acut	express	long-term	plasma	hepatocyt	diseas	hepatocyt	studi
colorect	follow	protein	contracept	chang	activ	surgeri	protein	drug-induc
studi	associ	hepatocyt	carcinoma	patient	regul	effect	receptor	herbal
tumor	therapi	inhibit	tumor	vitro	induc	tumor	inhibit	patient
review	chronic	regul	fibrosi	molecular	mice	arteri	induc	intox
metastat	overdos	induc	syndrom	antibodi	rat	us	gene	report
report	cancer	oxid	associ	oxid	role	diagnosi	signal	hepat
advanc	rat	role	chemotherapi	us	gene	evalu	respons	iron
cell	toxic	mice	hepatocellular	agent	signal	breast	role	clinic
analysi	oral	acid	hyperplasia	detect	viru	colorect	promot	overdos
cancer	inhibitor	patient	drug	hepatotox	rat	safeti	gene	cancer
phase	aid	therapi	syndrom	review	human	patient	disord	patient
patient	ceftriaxon	viru	advers	report	gene	efficaci	mutat	phase
studi	revers	antiretrovir	system	hepat	protein	studi	genet	advanc
advanc	progress	infect	reaction	associ	biliari	trial	associ	metastat
trial	demonstr	hepat	patient	literatur	model	treatment	express	trial
treatment	pump	liver	injuri	therapi	vitro	random	analysi	breast
metastat	List	immunodefici	report	toxic	character	double-blind	protein	studi
lung	String	human	clinic	therapeut	oxid	placebo-control	polymorph	lung
cell	Term	hiv	drug-induc	systemat	primari	diseas	famili	treatment
carcinoma	as	treatment	liver	sever	cirrhosi	arthriti	function	carcinoma
breast	diseas	studi	sever	follow	analysi	result	human	cell
versu	liver	hiv-infect	hypersensit	supplement	mechan	phase	novel	versus
safeti	safeti	associ	toxic	acetaminophen	molecular	long-term	depress	randomis
randomis	patient	hepatotox	symptom	intraven	interact	rheumatoid	character	chemotherapi
therapi	activ	risk	associ	herbal	structur	clinic	major	prostat
prostat	control	toxic	organ	dietari	membran	control	defici	random
plu	acut	adult	studi	acidosi	antigen	therapi	structur	therapi
result	infect	factor	databas	erythromycin	potenti	toler	identif	analysi
random	toxic	acidosi	event	lactic	chang	psoriasi	syndrom	open-label
health	patient	patient	transplant	treatment	diabet	cancer	treatment	syndrom
care	hepat	arteri	cell	multipl	patient	patient	infect	hypersensit
studi	treatment	effect	marrow	sclerosi	type	phase	tuberculosi	drug
patient	infect	coronari	stem	tuberculosi	level	studi	prevent	toxic
medic	therapi	acut	bone	fibrosi	plasma	treatment	complic	hepat
clinic	chronic	treatment	follow	isoniazid	diseas	advanc	hepatotox	associ
effect	diseas	diseas	hematopoiet	relaps	blood	trial	surgeri	steven-johnson
qualiti	liver	heart	patient	compar	function	metastat	experi	report
unit	viru	surgeri	allogen	infect	metabol	cell	author	epiderm
hospit	hepatotox	myocardi	liver	acut	arteri	leukemia	latent	necrolysi
practic	transplant	trial	autolog	pulmonari	increas	lung	tract	therapi
physician	hiv	pulmonari	diseas	complic	normal	safeti	venou	sever
children	cell	studi	high-dos	myeloma	concentr	breast	transl	review
evalu	leukemia	failur	busulfan	preval	hypertens	carcinoma	isoniazid	dress
program	acut	outcom	recipi	novel	us	lymphoma	total	pseudolithiasi
life	studi	infarct	veno-occlus	agent	applic	efficaci	malaria	studi
develop	treat	syndrom	treatment	infant	injuri	therapi	us	biliari
analysi	lymphoma	prevent	chemotherapi	network	imag	chemotherapi	pain	ceftriaxon
impact	safeti	hypertens	condit	global	mellitu	versu	regimen	bile
assess	associ	long-term	cyclophosphamid	progress	insulin	refractori	intraven	literatur
gene		patient	viru	cancer	patient	health	human	hepat
express		leukemia	hepat	patient	therapi	care	activ	patient
mutat		acut	infect	breast	infect	studi	receptor	virus
cell		lymphoma	human	studi	viru	patient	antibodi	infect
human		chronic	cell	advanc	lymphoma	medic	tumor	therapi
patient		phase	immunodefici	metastat	hepat	effect	vitro	chronic
associ		refractori	patient	treatment	antiretrovir	clinic	effect	treatment
primari		relaps	respons	phase	reactiv	hospit	factor	safeti
analysi		myeloid	antigen	therapi	hiv	qualiti	protein	genotyp
diseas		treatment	replic	lung	immunodefici	physician	necrosi	reactiv
biliari		studi	viral	prostat	human	diseas	cell	treat
cirrhosi		multipl	protein	cell	acidosi	adult	antigen	liver
protein		lymphoblast	immun	chemotherapi	sever	practic	inhibitor	antiretrovir
cancer		lymphocyt	chronic	colorect	hiv-infect	children	monoclon	trial
polymorph		therapi	reactiv	carcinoma	treatment	unit	novel	ribavirin
genet		hepat	antibodi	recurr	rituximab	evalu	recombin	studi
molecular		leukaemia	rna	hepatotox	lactic	impact	deriv	hcv
novel		b-cell	dna	combin	regimen	cancer	inhibit	clinic
identif		trial	liver	mutat	syndrom	risk	antagonist	sofosbuvir
syndrom		myeloma	type	dose	associ	program	bind	antivir
syndrom		safeti	rat	hepat	studi	hepat	patient	cancer
acut		patient	effect	patient	patient	viru	diseas	clinic
associ		trial	oxid	viru	risk	cell	effect	surgeri
report		efficaci	hypertens	therapi	clinic	liver	hypertens	chemotherapi
toxic		studi	function	infect	effect	activ	arteri	patient
hypersensit		random	blood	diseas	diseas	respons	coronari	treatment
hepat		double-blind	arteri	chronic	outcom	infect	pulmonari	colorect
poison		treatment	system	human	factor	human	heart	acid
patient		placebo-control	pulmonari	lymphoma	analysi	protein	chronic	biliari
hepatotox		phase	brain	treatment	women	immun	acut	trial
liver		clinic	nitric	reactiv	associ	express	system	diagnosi
treatment		result	neuron	associ	manag	antigen	fibrosi	venous
children		diseas	increas	sever	evalu	gene	myocardi	breast
review		control	chronic	antigen	experi	chronic	syndrom	therapi
fatal		randomis	injuri	immunodefici	incid	patient	portal	outcom
therapi		long-term	activ	gene	long-term	mice	outcom	review
acetaminophen		versu	level	hiv	therapi	replic	cardiac	screen
acidosi		type	diseas	express	prospect	inhibit	infarct	metastas
sever		multicent	improv	follow	cohort	dna	long-term	thrombosi
iron		compar	pressur	antivir	popul	viral	failur	hip

## Sheet: TW_arXiv
BTM										GSDMM										PTM										WNTM										SATM
#Clusters	#Genes (Mean)	Accuracy (Mean)	Recall (Mean)	Specifity (Mean)	F-measure (Mean)	Area Under Curve (Mean)	Precision (Mean)	Cohen's kappa (Mean)		#Clusters	#Genes (Mean)	Accuracy (Mean)	Recall (Mean)	Specifity (Mean)	F-measure (Mean)	Area Under Curve (Mean)	Precision (Mean)	Cohen's kappa (Mean)		#Clusters	#Genes (Mean)	Accuracy (Mean)	Recall (Mean)	Specifity (Mean)	F-measure (Mean)	Area Under Curve (Mean)	Precision (Mean)	Cohen's kappa (Mean)		#Clusters	#Genes (Mean)	Accuracy (Mean)	Recall (Mean)	Specifity (Mean)	F-measure (Mean)	Area Under Curve (Mean)	Precision (Mean)	Cohen's kappa (Mean)		#Clusters	#Genes (Mean)	Accuracy (Mean)	Recall (Mean)	Specifity (Mean)	F-measure (Mean)	Area Under Curve (Mean)	Precision (Mean)	Cohen's kappa (Mean)
19	142	0.857701	0.822089	0.891373	0.848822	0.915966	0.877686	0.71469		19	140	0.87112	0.831933	0.908173	0.862465	0.919824	0.895553	0.741534		19	250	0.878005	0.860264	0.894779	0.872667	0.937578	0.885525	0.755628		19	171	0.864236	0.836495	0.890465	0.85693	0.922566	0.878485	0.727907		19	197	0.872229	0.841897	0.900908	0.864929	0.926653	0.889394	0.743884
18	133	0.847316	0.808884	0.883655	0.837375	0.913777	0.868177	0.693826		18	137	0.871179	0.832413	0.907832	0.86258	0.920096	0.895294	0.741656		18	238	0.878296	0.859064	0.896481	0.872776	0.936607	0.887027	0.756192		18	164	0.864352	0.832173	0.894779	0.856401	0.918282	0.882174	0.728075		18	192.8	0.872112	0.840336	0.902157	0.864602	0.925883	0.890452	0.74363
17	125	0.846791	0.806483	0.884904	0.836514	0.909049	0.869079	0.692743		17	132	0.870128	0.831573	0.906583	0.861506	0.918689	0.893965	0.739555		17	228.3	0.878413	0.858703	0.897049	0.872837	0.935352	0.887523	0.756419		17	157.4	0.861319	0.829532	0.891373	0.853257	0.917342	0.878454	0.722		17	187.2	0.87007	0.837815	0.900568	0.862373	0.924924	0.888521	0.739529
16	123	0.84755	0.806603	0.886266	0.837205	0.908086	0.870522	0.694253		16	126	0.867095	0.823169	0.908627	0.857475	0.916334	0.894953	0.733392		16	218	0.87853	0.857143	0.898751	0.872745	0.935257	0.889039	0.756631		16	151	0.862077	0.828812	0.89353	0.853839	0.916326	0.880534	0.723499		16	183	0.871412	0.835534	0.905335	0.863301	0.92362	0.893172	0.74217
15	121	0.849008	0.809604	0.886266	0.839022	0.905699	0.870892	0.697204		15	120.9	0.86762	0.821969	0.910783	0.857743	0.915505	0.897075	0.734417		15	209.4	0.878588	0.858223	0.897843	0.872945	0.933076	0.888293	0.756763		15	143.6	0.862194	0.82449	0.897843	0.853284	0.914117	0.884225	0.723665		15	177.6	0.871529	0.833974	0.907037	0.863169	0.923119	0.894582	0.742378
14	115.2	0.847083	0.803241	0.888536	0.836198	0.903057	0.872265	0.693267		14	116.9	0.865811	0.818607	0.910443	0.855604	0.912886	0.89644	0.730769		14	200	0.87748	0.854382	0.899319	0.871427	0.932291	0.88924	0.754505		14	135.6	0.860327	0.819568	0.898865	0.850838	0.913598	0.88467	0.719876		14	171.5	0.869953	0.830612	0.907151	0.861258	0.920988	0.89443	0.739197
13	109.4	0.846616	0.8006	0.890125	0.835338	0.900133	0.87345	0.692295		13	112	0.861085	0.813325	0.906243	0.850468	0.911778	0.891509	0.721283		13	190	0.878005	0.852101	0.902497	0.871614	0.930727	0.892199	0.75552		13	131.5	0.859802	0.817287	0.9	0.850009	0.910561	0.885613	0.718797		13	165.3	0.869662	0.828451	0.908627	0.860644	0.920213	0.895592	0.738582
12	104.5	0.845041	0.79916	0.888422	0.833691	0.897481	0.871587	0.689139		12	107.8	0.858168	0.809124	0.90454	0.847125	0.909312	0.889238	0.71541		12	177	0.873279	0.844898	0.900114	0.866329	0.924962	0.889025	0.746018		12	124.3	0.857701	0.811405	0.901476	0.847166	0.905529	0.886342	0.714525		12	158.6	0.867153	0.82425	0.907719	0.857733	0.918017	0.89421	0.733527
11	98.8	0.844516	0.793878	0.892395	0.832278	0.896493	0.874967	0.688004		11	102.2	0.852859	0.8	0.902838	0.84075	0.905596	0.886304	0.704695		11	165.4	0.873687	0.841297	0.904313	0.866201	0.922336	0.892782	0.746781		11	117.2	0.857526	0.807083	0.905221	0.846312	0.904246	0.889642	0.714109		11	149.6	0.867795	0.822929	0.910216	0.858127	0.916575	0.896636	0.734786
10	92.5	0.843582	0.791116	0.89319	0.830948	0.894202	0.875385	0.6861		10	98.6	0.853384	0.797599	0.906129	0.84087	0.904138	0.889362	0.705704		10	153.1	0.871645	0.838535	0.902951	0.863947	0.920908	0.891126	0.742678		10	105	0.853151	0.797959	0.905335	0.840813	0.89932	0.88858	0.705253		10	141.4	0.86727	0.819808	0.912145	0.857174	0.915366	0.89827	0.733695
9	88	0.843291	0.787155	0.896368	0.829975	0.892045	0.877929	0.68545		9	95	0.853267	0.797119	0.906356	0.840659	0.903459	0.889611	0.705463		9	142.8	0.864819	0.82461	0.902838	0.855672	0.913278	0.889253	0.728889		9	96.8	0.850292	0.792317	0.905108	0.837254	0.896247	0.887693	0.699471		9	131.8	0.866278	0.815966	0.913848	0.855672	0.912985	0.899618	0.731663
8	83.6	0.840957	0.782353	0.896368	0.826999	0.889183	0.877386	0.680724		8	92.9	0.852859	0.793277	0.909194	0.839631	0.901899	0.892112	0.704587		8	129	0.864002	0.819328	0.906243	0.854129	0.910171	0.892106	0.727185		8	88	0.84895	0.787755	0.90681	0.83523	0.892578	0.888932	0.696724		8	121	0.861494	0.811164	0.909081	0.850549	0.909329	0.894167	0.722067
7	77.1	0.835998	0.773229	0.895346	0.820853	0.8842	0.875118	0.670697		7	89	0.853151	0.794838	0.908286	0.840201	0.899318	0.891405	0.705197		7	120	0.862077	0.814886	0.906697	0.851665	0.905937	0.89204	0.723284		7	82	0.824387	0.756663	0.888422	0.807256	0.8727	0.865272	0.647297		7	109	0.849942	0.788715	0.907832	0.836246	0.896314	0.890044	0.698709
6	69	0.829697	0.758944	0.896595	0.812415	0.876488	0.874465	0.6579		6	83	0.849067	0.780432	0.913961	0.833959	0.893545	0.895737	0.696828		6	109.5	0.858868	0.807923	0.907037	0.847595	0.902849	0.891508	0.716786		6	73.6	0.826371	0.74898	0.899546	0.807422	0.870908	0.876069	0.651095		6	95	0.845158	0.779352	0.907378	0.830219	0.891386	0.888366	0.689028
5	63.3	0.826138	0.748619	0.899432	0.80708	0.871159	0.875802	0.650619		5	73.6	0.83944	0.763025	0.911691	0.821981	0.880804	0.891168	0.677363		5	90.6	0.832264	0.754622	0.905675	0.813602	0.877773	0.883008	0.662905		5	63	0.827655	0.732413	0.917707	0.805063	0.869312	0.893967	0.653333		5	84	0.841307	0.761465	0.916799	0.8234	0.882303	0.896482	0.681054
4	51	0.816628	0.722929	0.905221	0.792979	0.860948	0.878411	0.631188		4	53.1	0.834306	0.744778	0.918956	0.813748	0.868918	0.897114	0.666815		4	66	0.79825	0.693758	0.897049	0.769685	0.839653	0.864332	0.593998		4	54.5	0.821354	0.719688	0.91748	0.796542	0.86194	0.89204	0.640536		4	76	0.838856	0.754982	0.918161	0.81992	0.878886	0.897308	0.676061
3	39.6	0.807235	0.692437	0.915778	0.77737	0.844597	0.886533	0.611861		3	40	0.815053	0.72557	0.899659	0.79218	0.852103	0.872517	0.628106		3	52	0.777421	0.663025	0.885585	0.743182	0.813624	0.845677	0.55185		3	45.1	0.807118	0.694718	0.913394	0.777778	0.84764	0.883725	0.611671		3	55.6	0.827188	0.721849	0.926788	0.802052	0.857681	0.903458	0.652182
2	30	0.793641	0.657503	0.922361	0.755868	0.826788	0.889216	0.584005		2	32	0.813711	0.703842	0.917594	0.785953	0.841456	0.889864	0.624992		2	36	0.772054	0.634574	0.902043	0.730069	0.796418	0.859638	0.540466		2	34	0.793407	0.664586	0.91521	0.757635	0.826779	0.881549	0.583703		2	37	0.813419	0.668908	0.950057	0.776949	0.828839	0.926896	0.623688
1	20	0.780338	0.597119	0.953575	0.725381	0.798489	0.924162	0.556051		1	20	0.784656	0.622329	0.938138	0.737424	0.800938	0.904994	0.565274		1	20	0.731797	0.52617	0.92622	0.655866	0.750501	0.871019	0.457317		1	20	0.762252	0.537575	0.974688	0.687174	0.765356	0.952636	0.51841		1	20	0.746791	0.511285	0.969467	0.66232	0.747655	0.94079	0.486798

#Clusters	Model	Accuracy (Mean)	Recall (Mean)	Specifity (Mean)	F-measure (Mean)	Area Under Curve (Mean)	Precision (Mean)	Cohen's kappa (Mean)
TextNetTopics	TNT(BTM)	0.857701	0.822089	0.891373	0.848822	0.915966	0.877686	0.71469			142
	TNT(GSDMM)	0.87112	0.831933	0.908173	0.862465	0.919824	0.895553	0.741534
	TNT(PTM)	0.864819	0.82461	0.902838	0.855672	0.913278	0.889253	0.728889
	TNT(WNTM)	0.862194	0.82449	0.897843	0.853284	0.914117	0.884225	0.723665
	TNT(SATM)	0.86727	0.819808	0.912145	0.857174	0.915366	0.89827	0.733695
	TNT(GPM)	0.856651	0.818848	0.892395	0.847358	0.913264	0.878044	0.712548
	TNT(GPU_DMM)	0.858693	0.821489	0.893871	0.849622	0.916236	0.879841	0.716652
	TNT(GPU_PDMM)	0.862602	0.814886	0.907719	0.852145	0.90956	0.893113	0.724329
	TNT(LFDMM)	0.862194	0.82569	0.896708	0.853465	0.918034	0.883323	0.723683
XGBOOST	Adaboost	0.879522	0.835414	0.921226	0.87078	0.941409	0.909928	0.761149
	DT	0.867561	0.829652	0.903405	0.858882	0.900859	0.890391	0.73613
	LogitBoost	0.88133	0.837455	0.922815	0.872748	0.940263	0.91121	0.764369
	RF	0.881505	0.843217	0.917707	0.873655	0.937704	0.906514	0.764231
SKB	Adaboost	0.873687	0.823649	0.920999	0.863711	0.939942	0.908423	0.749966
	DT	0.851167	0.815966	0.884449	0.842039	0.886858	0.871509	0.704124
	LogitBoost	0.877596	0.829172	0.923383	0.868116	0.940446	0.911352	0.757594
	RF	0.871937	0.828571	0.91294	0.86283	0.93357	0.900321	0.745549
#Clusters	Model	Accuracy (Mean)	Recall (Mean)	Specifity (Mean)	F-measure (Mean)	Area Under Curve (Mean)	Precision (Mean)	Cohen's kappa (Mean)
Topic Model
GSDMM
PTM		0.878005	0.852101	0.902497	0.871614	0.930727	0.892199	0.75552
BTM
SATM		0.871412	0.835534	0.905335	0.863301	0.92362	0.893172	0.74217
WNTM		0.864236	0.836495	0.890465	0.85693	0.922566	0.878485	0.727907
GPU_PDMM		0.87007	0.834454	0.903746	0.861853	0.925012	0.891369	0.739478
GPM
XGBOOST	Adaboost	0.877946	0.834934	0.918615	0.869186	0.940425	0.906925	0.757784
	DT	0.864411	0.831453	0.895573	0.8562	0.8979	0.883302	0.729878
	LogitBoost	0.878005	0.839136	0.914756	0.869866	0.938224	0.903326	0.757418
	RF	0.879697	0.85042	0.907378	0.872918	0.93912	0.897064	0.760132
SKB	Adaboost	0.87888	0.834334	0.920999	0.87007	0.94384	0.909344	0.759703
	DT	0.857468	0.832653	0.880931	0.850292	0.88908	0.868881	0.715115
	LogitBoost	0.87783	0.836615	0.916799	0.869369	0.942084	0.905002	0.757149
	RF	0.87853	0.847419	0.907946	0.871467	0.939835	0.897019	0.757667
FCBF	Adaboost	0.55	0.947299	0.174347	0.673282	0.582011	0.525576	#NUM!
	DT	0.485998	1	0	0.654103	0.556798	0.485998	#NUM!
	LogitBoost	0.546791	0.947899	0.167537	0.671487	0.562425	0.522908	#NUM!
	RF	0.525963	0.944778	0.129966	0.660051	0.559247	0.509467	#NUM!
		0.00169195	0.147899	0.0185017	0.00130491	0.0131133	0.0171446	#NUM!
		0.00169195	-0.00168067	0.00488082	0.00130491	0.00839355	0.00486451	0.00461183
[truncated: 36 more columns]

## Sheet: FL_arXiv
	Model	Features	Accuracy	Sensitivity	Specifity	Precision	F-measure	Cohen's kappa		Reduction (Size)	PM-[BW+TD]		PM - TD	PM - TW
	BW	1292	0.869181	0.891796	0.846275	0.854591	0.872745	0.73828
GSDMM	TW + TD	152	0.90431	0.88705	0.920612	0.913539	0.90006	0.808311		0.872803	0.00149646		0.0274586	0.0375944
	BW + TD	1195	0.903384	0.880552	0.924972	0.917398	0.898563	0.806405
	TW	140	0.87112	0.831933	0.908173	0.895553	0.862465	0.741534
	TD	20	0.878043	0.859952	0.89513	0.885764	0.872601	0.75569
BTM	TW + TD	142	0.9009	0.8904	0.9109	0.9042	0.8972	0.8016		0.881172	0.00401568		0.0112	0.0483783
	BW + TD	1195	0.8972	0.884514	0.909194	0.902111	0.893184	0.794128
	TW	142	0.857701	0.822089	0.891373	0.877686	0.848822	0.71469
	TD	20	0.8896	0.8832	0.8956	0.8889	0.886	0.7789
PTM	TW + TD	242.7	0.886139	0.885132	0.887089	0.8812	0.883054	0.772121		0.796904	-0.00242379		0.0314086	0.0101089
	BW + TD	1195	0.889732	0.877311	0.901476	0.893907	0.885478	0.779178
	TW	209.4	0.878588	0.858223	0.897843	0.888293	0.872945	0.756763
	TD	20	0.855213	0.855516	0.854926	0.84803	0.851646	0.710265
SATM	TW + TD	182	0.860687	0.82506	0.894337	0.880736	0.85192	0.720659		0.847699	-0.0130586		0.0630652	-0.0130097
	BW + TD	1195	0.872637	0.839616	0.903859	0.892039	0.864978	0.744664
	TW	197	0.872229	0.841897	0.900908	0.889394	0.864929	0.743884
	TD	20	0.799767	0.770144	0.827746	0.808609	0.788855	0.598678
WNTM	TW + TD	181.5	0.871578	0.838249	0.903058	0.891001	0.863781	0.742526		0.848117	-0.00325663		0.0123485	0.00685118
	BW + TD	1195	0.875088	0.838295	0.909875	0.898046	0.867038	0.749524
	TW	171	0.864236	0.836495	0.890465	0.878485	0.85693	0.727907
	TD	20	0.860047	0.82554	0.892639	0.879126	0.851433	0.719394
GPM	TW + TD	129	0.891031	0.8753	0.905889	0.89785	0.8864	0.781732		0.89205	-0.0117239		0.0228356	0.0390425
	BW + TD	1195	0.902917	0.880672	0.92395	0.916336	0.898124	0.805475
	TW	141	0.856651	0.818848	0.892395	0.878044	0.847358	0.712548
	TD	20	0.868608	0.856355	0.880181	0.871088	0.863564	0.736877
GPU_DMM	TW + TD	117.5	0.903902	0.879496	0.926954	0.919225	0.89889	0.807417		0.901674	0.00191457		0.00832901	0.0492679
	BW + TD	1195	0.902217	0.87599	0.927015	0.919099	0.896975	0.80403
	TW	141	0.858693	0.821489	0.893871	0.879841	0.849622	0.716652
	TD	20	0.896389	0.868225	0.92299	0.9142	0.890561	0.792317
GPU_PDMM	TW + TD	230	0.889051	0.870624	0.906455	0.897869	0.884012	0.777732		0.807531	-0.00479474		0.0170338	0.0305472
	BW + TD	1195	0.893291	0.877671	0.908059	0.900382	0.888807	0.786267
	TW	142	0.862194	0.82569	0.896708	0.883323	0.853465	0.723683
	TD	20	0.87187	0.859712	0.883352	0.874431	0.866978	0.74341
LFDMM	TW + TD	96	0.887012	0.86271	0.909966	0.9006	0.881183	0.773576		0.919665	-0.000310197		0.012424	0.0277177
	BW + TD	1195	0.887398	0.861825	0.911578	0.902209	0.881493	0.774344
	TW	142	0.862194	0.82569	0.896708	0.883323	0.853465	0.723683
	TD	20	0.874898	0.852518	0.896036	0.885723	0.868759	0.749332
											TW + TD	BW + TD	TW	TD
										GSDMM	0.90006	0.898563	0.862465	0.872601
										GPU_DMM	0.89889	0.896975	0.849622	0.890561
										GPU_PDMM	0.884012	0.888807	0.853465	0.866978
										LFDMM	0.881183	0.881493	0.853465	0.868759
										GPM	0.8864	0.898124	0.847358	0.863564
										BTM	0.8972	0.893184	0.848822	0.886
										WNTM	0.863781	0.867038	0.85693	0.851433
										SATM	0.85192	0.864978	0.864929	0.788855
										PTM	0.883054	0.885478	0.872945	0.851646

## Sheet: Intersection_A
Original										Removed Duplicate
GSDMM	GPM	BTM	WNTM	SATM	PTM	GPU_DMM	GPU_PDMM	LFDMM		GSDMM	GPM	BTM	WNTM	SATM	PTM	GPU_DMM	GPU_PDMM	LFDMM			GSDMM	GPM	BTM	WNTM	SATM	PTM	GPU_DMM	GPU_PDMM	LFDMM
learn	learn	predict	segment	model	optim	learn	featur	graph		learn	learn	predict	segment	model	optim	learn	featur	graph		GSDMM	140	0.8	0.828571	0.9	0.914286	0.978571	0.9	0.971429	0.814286
adapt	reinforc	learn	imag	structur	via	imag	via	network		adapt	reinforc	learn	imag	structur	via	imag	via	network		GPM	0.751678	149	0.718121	0.778523	0.791946	0.872483	0.765101	0.872483	0.718121
domain	represent	model	network	decis	system	optim	base	learn		domain	represent	model	network	decis	system	optim	base	learn		BTM	0.816901	0.753521	142	0.908451	0.915493	0.978873	0.795775	0.964789	0.767606
person	deep	us	us	tree	gener	cluster	analysi	neural		person	deep	us	us	tree	gener	cluster	analysi	neural		WNTM	0.732558	0.674419	0.75	172	0.825581	0.918605	0.726744	0.924419	0.697674
re-identif	graph	network	deep	data	distribut	us	inform	network		re-identif	graph	network	deep	data	distribut	us	inform	predict		SATM	0.649746	0.598985	0.659898	0.720812	197	0.908629	0.64467	0.908629	0.629442
unsupervis	explor	data	semant	causal	toward	analysi	cloud	predict		unsupervis	explor	data	semant	causal	toward	analysi	cloud	deep		PTM	0.548	0.52	0.556	0.632	0.716	250	0.548	0.856	0.524
imag	transfer	deep	convolut	effici	design	segment	robust	deep		imag	transfer	deep	convolut	effici	design	segment	robust	convolut		GPU_DMM	0.893617	0.808511	0.801418	0.886525	0.900709	0.971631	141	0.978723	0.801418
transfer	network	forecast	medic	analysi	complex	deep	cluster	convolut		transfer	network	forecast	medic	analysi	complex	deep	cluster	use		GPU_PDMM	0.571429	0.546218	0.57563	0.668067	0.752101	0.89916	0.579832	238	0.554622
network	hierarch	neural	classif	via	survei	base	select	use		network	hierarch	neural	classif	via	survei	base	select	forecast		LFDMM	0.75	0.703947	0.717105	0.789474	0.815789	0.861842	0.743421	0.868421	152
featur	via	time	base	neural	applic	model	kernel	forecast		featur	via	time	base	neural	applic	model	kernel	represent
represent	effici	seri	detect	represent	benchmark	represent	sampl	represent		represent	effici	seri	detect	represent	benchmark	represent	sampl	knowledg
gener	inform	estim	neural	latent	infer	via	spars	graph		gener	inform	estim	neural	latent	infer	via	spars	embed
deep	neural	base	cloud	infer	recommend	kernel	space	knowledg		deep	neural	base	cloud	infer	recommend	kernel	space	attent
adversari	unsupervis	attent	learn	interpret	continu	cloud	spectral	embed		adversari	unsupervis	attent	learn	interpret	continu	cloud	spectral	via
via	model	machin	gener	featur	partial	featur	match	attent		via	model	machin	gener	featur	partial	featur	match	data
segment	reward	process	supervis	variabl	composit	data	filter	via		segment	reward	process	supervis	variabl	composit	data	filter	classif
attent	featur	health	brain	random	transport	graph	adapt	data		attent	featur	health	brain	random	transport	graph	adapt	time
classif	framework	approach	instanc	discoveri	set	regular	regular	classif		classif	framework	approach	instanc	discoveri	set	regular	regular	base
few-shot	structur	framework	activ	approach	entropi	robust	matrix	time		few-shot	structur	framework	activ	approach	entropi	robust	matrix	model
detect	bayesian	graph	automat	sequenti	scale	embed	correl	base		detect	bayesian	graph	automat	sequenti	scale	embed	correl	gaussian
learn	detect	seri	graph	imag	time	detect	learn	learn		data	detect	multivari	graph	imag	time	detect	learn	bayesian
deep	object	time	network	gener	seri	object	machin	model		machin	object	classif	represent	gener	seri	object	machin	process
data	network	forecast	neural	person	network	network	tree	gaussian		model	visual	detect	embed	person	network	network	tree	latent
machin	visual	multivari	learn	learn	neural	salient	decis	bayesian		predict	video	anomali	via	learn	neural	salient	decis	causal
model	video	classif	represent	network	forecast	learn	explain	process		us	recognit	transform	knowledg	network	forecast	attent	explain	infer
predict	recognit	network	embed	re-identif	predict	featur	data	latent		approach	scene	method	predict	re-identif	predict	supervis	data	markov
us	scene	data	via	gan	graph	attent	algorithm	causal		reinforc	track	convolut	node	gan	graph	video	algorithm	variat
represent	track	detect	knowledg	us	deep	supervis	explan	infer		system	real	time-seri	molecular	us	deep	weakli	explan	linear
detect	real	neural	convolut	condit	multivari	segment	boost	markov		survei	convolut	gener	attent	condit	multivari	convolut	boost	approach
approach	convolut	model	predict	synthesi	classif	video	applic	deep		analysi	tim	sampl	structur	synthesi	classif	neural	applic	structur
transfer	tim	anomali	node	transform	detect	weakli	interpret	variat		explain	segment	reinforc	featur	transform	detect	local	interpret	explor
classif	segment	learn	classif	via	convolut	deep	forest	network		base	attent	optim	data	translat	convolut	rgb-d	forest	regress
reinforc	deep	transform	molecular	translat	attent	via	ensembl	model		framework	transform	polici	messag	toward	attent	context	ensembl	seri
imag	attent	method	attent	toward	recurr	convolut	system	linear		graph	us	algorithm	inform	unsupervis	recurr	machin	system	detect
system	transform	convolut	detect	unsupervis	traffic	neural	random	process		neural	text	effici	adversari	languag	traffic	predict	random	multivari
survei	us	time-seri	structur	languag	us	local	method	approach		convolut	end	decis	model	visual	us	transfer	method	analysi
analysi	text	attent	featur	visual	anomali	us	classifi	structur		embed	multi	gradient	condit	attribut	anomali	approach	classifi	health
explain	neural	graph	data	attribut	base	imag	gradient	explor		knowledg	data	via	gan	natur	base	classif	gradient	anomali
base	end	gener	messag	natur	tempor	rgb-d	vector	neural		node	machin	control	attack	match	tempor	explain	vector	adversari
framework	featur	sampl	inform	match	time-seri	context	fair	regress		forecast	tree	explor	train	time	time-seri	reinforc	fair	probabilist
network	learn	learn	gener	time	learn	learn	gener	time		structur	decis	tree	robust	seri	learn	system	gener	imag
graph	reinforc	reinforc	adversari	seri	represent	deep	adversari	seri		recurr	ag	adapt	synthesi	forecast	represent	survei	adversari	recognit
neural	deep	optim	network	model	deep	data	network	data		dynam	algorithm	bayesian	translat	classif	person	medic	network	reinforc
learn	multi	polici	model	data	person	model	attack	learn		attack	distribut	adversari	improv	detect	unsupervis	polici	attack	visual
convolut	data	algorithm	imag	forecast	unsupervis	machin	robust	forecast		robust	system	imag	autoencod	multivari	re-identif	gradient	us	machin
predict	machin	effici	us	classif	re-identif	predict	us	detect		train	optim	condit	reinforc	anomali	featur	effici	train	object
embed	tree	decis	condit	structur	featur	represent	train	classif		gan	explain	gan	observ	attent	transfer	sampl	gan	languag
attent	decis	gradient	gan	detect	transfer	us	gan	network		recognit	classif	synthesi	comput	method	few-shot	algorithm	condit	survey
deep	ag	via	data	multivari	classif	transfer	condit	multivari		condit	predict	attack	effici	probabilist	contrast	explor	imag	transfer
knowledg	algorithm	control	attack	transform	few-shot	detect	imag	predict		action	polici	train	unsupervis	base	self-supervis	approxim	model	generat
us	distribut	sampl	detect	anomali	contrast	approach	model	neural		video	boost	transfer	program	time-seri	data	function	improv	train
represent	system	explor	train	attent	self-supervis	analysi	data	analysi		tempor	architectur	robust	latent	regress	zero-shot	method	synthesi	stochast
model	us	us	robust	method	data	imag	improv	deep		human	gener	singl	task	applic	discrimin	stochast	toward	robust
via	optim	process	synthesi	probabilist	zero-shot	classif	synthesi	use		scene	kernel	translat	level	machin	visual	linear	exampl	regular
node	explain	model	neural	base	discrimin	explain	toward	health		text	differenti	recurr	control	reinforc	cross-mod	q-learn	augment	gradient
forecast	classif	deep	via	time-seri	visual	reinforc	exampl	model		local	interpret	architectur	estim	deep	match	off-polici	synthet	gan
structur	predict	tree	translat	us	cross-mod	system	augment	anomali		optim	explan	dynam	depth	transfer	embed	control	defens	bias
recurr	via	adapt	improv	regress	match	survei	classifi	adversari		cluster	search	recognit	pose	recognit	model	bound	effici	general
classif	polici	bayesian	deep	applic	embed	base	synthet	model		regular	dynam	interpret	flow	map	interpret	gener	optim	improv
dynam	boost	gener	autoencod	approach	gener	medic	defens	probabilist		transform	supervis	explan	object	vector	structur	variat	transform	differenti
adversari	neural	gener	learn	learn	model	learn	effici	learn		effici	salient	explain	video	code	approach	causal	architectur	sampl
gener	model	adversari	via	represent	us	reinforc	optim	deep		estim	monocular	featur	monocular	disentangl	explain	infer	search	descent
network	transform	network	reinforc	machin	predict	polici	transform	detect		gradient	estim	analysi	scene	benchmark	causal	structur	differenti	optim
attack	learn	imag	us	via	interpret	optim	architectur	use		kernel	depth	represent	optic	fusion	dynam	latent	neural	framework
neural	network	us	gener	reinforc	structur	deep	search	data		fast	imag	space	motion	knowledg	comput	process	framework	multi-agent
detect	deep	condit	imag	deep	approach	gradient	differenti	adversari		tensor	detector	segment	reconstruct	robust	classifi	autoencod	compress	effici
learn	graph	gan	model	classif	explain	via	model	imag		object	adapt	random	human	distil	probabilist	gaussian	comput	hierarch
model	architectur	model	predict	unsupervis	causal	effici	neural	recognit		track	cloud	embed	optim	search	scalabl	adversari	bayesian	unsupervis
data	optim	synthesi	observ	transfer	infer	sampl	framework	reinforc		dataset	shot	cluster	adapt	architectur	perform	estim	fast	model-base
us	gener	deep	comput	featur	dynam	algorithm	via	model		drive	semant	semant	space	system	sequenc	differenti	design	toward
robust	kernel	attack	effici	us	comput	explor	train	classif		autonom	medic	medic	kernel	improv	flow	train	code	experi
deep	us	via	unsupervis	analysi	data	approxim	improv	visual		real-tim	instanc	object	stochast	dynam	measur	architectur	program	replay
graph	attent	detect	improv	approach	classifi	function	compress	machin		visual	semi	cloud	random	framework	adapt	transform	process	video
train	differenti	train	program	recognit	probabilist	method	algorithm	object		cloud	label	super-resolut	approxim	agent	domain	compress	structur	segment
gan	interpret	transfer	train	map	scalabl	stochast	comput	via		vehicl	few	sens	dynam	space	semi-supervis	search	variat	scene
imag	explan	robust	latent	vector	perform	linear	bayesian	languag		synthesi	analysi	instanc	transform	task	distil	prune	infer	action
via	machin	singl	task	code	detect	q-learn	fast	network		super-resolut	to	video	system	semi-supervis	knowledg	filter	gaussian	transform
predict	search	learn	level	disentangl	sequenc	off-polici	design	survey		singl	random	action	machin	explain	align	time	latent	caption
recognit	effici	translat	automat	benchmark	flow	control	code	transfer		translat	base	visual	applic	object	improv	seri	causal	semant
condit	dynam	base	control	fusion	measur	bound	program	analysi		resolut	pose	tempor	transfer	salient	regular	forecast	markov	human
network	detect	network	estim	learn	learn	model	model	network		time	cnn	human	dataset	track	disentangl	multivari	estim	understand
recognit	object	neural	depth	deep	adapt	learn	gener	adversari		seri	view	scene	analysi	spars	task	anomali	autoencod	super-resolut
action	learn	convolut	learn	transfer	domain	gener	process	neural		multivari	reconstruct	local	algorithm	cloud	video	recurr	regress	color
video	network	graph	pose	knowledg	via	network	structur	generat		anomali	scal	text	method	detector	transform	knowledg	probabilist	cnn
attent	supervis	deep	flow	model	unsupervis	graph	variat	train		depth	human	color	approach	accur	languag	node	variabl	fast
convolut	salient	us	unsupervis	robust	transfer	neural	infer	stochast		pose	action	automat	super-resolut	real-tim	local	adapt	super-resolut	singl
neural	monocular	attent	cloud	reinforc	represent	variat	gaussian	via		flow	tempor	depth	singl	scene	relat	dynam	singl	estim
learn	estim	detect	object	distil	semi-supervis	deep	latent	robust		monocular	resolut	flow	color	fast	track	recognit	color	depth
graph	depth	recurr	video	search	distil	causal	causal	graph		optic	caption	pose	sens	multipl	vision	action	enhanc	flow
detect	attent	adversari	us	architectur	knowledg	us	markov	learn		reconstruct	super	unsupervis	resolut	autonom	challeng	human	resolut	pose
predict	video	train	monocular	system	self-supervis	infer	us	model		motion	motion	monocular	remot	rgb-d	scene	facial	denois	optic
tempor	segment	architectur	scene	improv	align	structur	estim	regular		stereo	domain	optic	enhanc	adapt	reason	person	restor	monocular
us	deep	via	deep	toward	gener	represent	autoencod	gradient		self-supervis	approach	languag	spatial	segment	natur	motion	guid	motion
human	imag	gener	network	dynam	improv	latent	bayesian	gan		semant	translat	search	domain	semant	caption	re-identif	map	text
scene	detector	predict	optic	framework	contrast	process	regress	bias		medic	challeng	toward	person	convolut	gradient	synthesi	reconstruct	method
text	adapt	effici	motion	agent	toward	autoencod	random	general		supervis	train	natur	re-identif	medic	algorithm	gan	super	cluster
deep	featur	dynam	reconstruct	space	regular	gaussian	space	improv		semi-supervis	languag	comput	recognit	few-shot	approxim	condit	cnn	activ
featur	multi	classif	predict	task	structur	adversari	probabilist	differenti		instanc	self	knowledg	self-supervis	domain	stochast	translat	prior	algorithm
local	cloud	recognit	human	semi-supervis	disentangl	estim	variabl	sampl		weakli	natur	molecular	visual	instanc	sampl	super-resolut	depth	reconstruct
model	shot	robust	imag	explain	task	differenti	condit	descent		control	gan	node	polici	cluster	polici	singl	polici	adapt
network	segment	learn	learn	detect	video	network	imag	learn		multi-ag	adversari	structur	multi-ag	spatial	linear	unsupervis	function	inform
optim	imag	neural	model	object	attent	neural	super-resolut	reinforc		polici	cluster	messag	agent	consist	method	image-to-imag	bound	explan
model	semant	data	optim	via	visual	deep	singl	deep		agent	robust	properti	continu	hierarch	function	visual	approxim	tree
neural	learn	network	us	featur	dynam	graph	us	optim		environ	regular	variat	environ	estim	bound	scene	linear	decis
learn	network	model	graph	salient	gener	convolut	color	framework		invers	spectral	infer	framework	depth	train	text	distribut	explain
analysi	supervis	tree	gener	track	via	learn	enhanc	use		contrast	embed	latent	invers	super-resolut	effici	caption	stochast	interpret
cluster	deep	interpret	neural	spars	graph	train	base	machin		inform	knowledg	causal	autonom	monocular	theori	semant	valu	random
graph	cloud	explan	network	cloud	transform	optim	resolut	multi-agent		architectur	contrast	gaussian	architectur	singl	converg	languag	evalu	featur
regular	convolut	graph	effici	detector	tempor	architectur	synthesi	approach		search	distil	salient	search	pose	gan	instanc	q-learn	vector
transform	medic	deep	via	accur	languag	transform	via	represent		prune	node	supervis	filter	field	estim	attack	converg	polici
effici	transform	explain	adapt	real-tim	learn	effici	denois	via		variat	bas	weakli	bayesian	reconstruct	minim	improv	visual	valu
gan	us	decis	space	scene	local	model	gan	effici		process	agent	track	recurr	self-supervis	inform	explan	scene	control
estim	classif	us	base	anomali	relat	us	restor	hierarch		causal	control	detector	compress	video	molecular	domain	recognit	off-polici
via	shot	featur	kernel	robust	track	gener	guid	unsupervis		latent	benchmark	rgb-d	prune	human	variat	few-shot	attent	q-learn
gradient	instanc	classif	stochast	fast	vision	via	map	explor		infer	game	fusion	salient	stereo	node	depth	text	function
kernel	attent	predict	random	multipl	challeng	compress	reconstruct	model-base		gaussian	experi	multi-ag	track	guid	label	track	languag	approxim
fast	semi	adversari	approxim	fusion	scene	search	super	toward		autoencod	singl	agent	real-tim	joint	hierarch	monocular	understand	re-identif
tensor	label	via	imag	autonom	reason	prune	cnn	represent		bayesian	color	environ	weakli	tempor	heterogen	pose	video	person
train	multi	gener	dynam	rgb-d	natur	filter	prior	experi		salient	flow	hierarch	fusion	predict	autoencod	autonom	natur	domain
gener	few	machin	transform	adapt	caption	kernel	depth	replay		rgb-d	complet	reward	local	caption	properti	drive	caption	self-supervis
detect	learn	learn	learn	segment	optim	time	optim	attent		languag	synthesi	continu	detector	relat	feder	fusion	retriev	contrast
object	imag	imag	detect	imag	gradient	seri	polici	network		vision	identif	invers	time	function	reinforc	real-tim	vision	match
track	deep	network	data	network	algorithm	network	gradient	recognit		caption	re	task	seri	filter	control	contrast	question	synthesi
imag	network	graph	deep	semant	approxim	forecast	method	video		tree	person	person	forecast	game	multi-ag	inform	answer	condit
dataset	end	us	us	transform	stochast	learn	algorithm	visual		decis	variat	re-identif	multivari	valu	explor	self-supervis	attribut	translat
us	us	neural	classif	attent	regular	neural	effici	graph		interpret	autoencod	domain	anomali	aggreg	agent	reward	graph	agent
base	model	via	imag	convolut	sampl	model	sampl	network		explan	encod	contrast	cluster	graph	model-bas	tree	embed	imit
segment	neural	featur	model	cloud	polici	predict	function	imag		boost	recurr	inform	time-seri	recurr	invers	decis	knowledg	traffic
estim	featur	optim	base	adapt	linear	deep	bound	convolut		algorithm	filter	discrimin	regress	variat	reward	interpret	predict	signal
drive	detect	model	neural	medic	method	data	approxim	segment		method	gradient	match	gradient	traffic	environ	boost	distil	dynam
autonom	analysi	analysi	system	few-shot	function	us	linear	learn		color	sampl	retriev	sampl	ensembl	onlin	dataset	molecular	salient
video	to	deep	machin	domain	adapt	classif	regular	scene		automat	function	disentangl	function	propag	imag	color	interact	track
real-tim	gener	represent	object	base	bound	graph	robust	action		explor	stochast	cross-mod	explor	autoencod	segment	benchmark	node	real-time
network	segment	space	applic	instanc	train	detect	distribut	use		sampl	approxim	self-supervis	valu	survei	semant	challeng	relat	fusion
visual	random	segment	transfer	cluster	effici	multivari	stochast	neural		approxim	method	system	bound	enhanc	super-resolut	multi-ag	properti	cloud
robust	base	base	dataset	effici	theori	convolut	valu	transform		function	valu	survei	distribut	label	cloud	agent	messag	detector
cloud	classif	time	analysi	spatial	converg	anomali	estim	caption		off-polici	process	applic	odel	polici	singl	distribut	pass	tensor
vehicl	graph	random	algorithm	us	gan	attent	evalu	semant		distribut	bound	activ	languag	optim	fusion	onlin	reason	tempor
model	estim	embed	method	consist	estim	recurr	q-learn	human		valu	condit	distribut	natur	explor	instanc	flow	tempor	kernel
system	convolut	cluster	approach	hierarch	minim	base	converg	understand		linear	attribut	stochast	text	gradient	fast	optic	heterogen	transport
imag	estim	imag	imag	estim	graph	graph	visual	convolut			edit	regular	caption	algorithm	dens	reconstruct	domain	select
gener	imag	segment	network	depth	learn	network	transform	imag			dataset	converg	understand	multi-ag	enhanc		person	low-rank
network	network	network	super-resolut	imag	represent	neural	imag	neural			attack		toward	control	resolut		re-identif	factor
adversari	learn	semant	deep	super-resolut	embed	learn	scene	network			time		process	distribut	object		unsupervis	architectur
us	multi	deep	us	monocular	predict	convolut	recognit	use			seri		gaussian	environ	salient		translat	search
synthesi	depth	learn	base	singl	inform	embed	attent	deep			forecast		causal	sampl	detector		align	compress
learn	us	us	singl	pose	knowledg	represent	text	segment			multivari		variat	linear	sens		transfer	prune
super-resolut	pose	convolut	featur	scene	molecular	predict	languag	detect			gaussian		infer	model-bas	dataset		image-to-imag	medic
singl	detect	medic	color	network	variat	knowledg	gener	network			anomali		spars	continu	remot		cross-domain	semi-supervis
gan	object	attent	attent	field	node	via	understand	base					factor	q-learn	real-tim		bridg	supervis
via	recognit	base	sens	us	label	deep	video	learn					health	onlin	autonom		cross-mod	few-shot
attent	cnn	object	segment	object	hierarch	node	natur	super-resolut					interpret	local	drive		spatial	weak
model	view	neural	resolut	reconstruct	heterogen	us	toward	imag					explan	explan	vehicl		convolut
condit	reconstruct	cloud	via	self-supervis	via	attent	caption	classif					record	scalabl	imageri		deep
deep	scene	detect	detect	effici	relat	classif	retriev	color					futur	process	medic		recurr
translat	neural	super-resolut	remot	video	autoencod	model	base	graph					electron	stochast	color		dynam
unsupervis	scal	gener	enhanc	human	dynam	featur	vision	transfer					explain	regular	automat		hierarch
transform	video	featur	gener	stereo	properti	adapt	question	cnn					clinic	bayesian	activ		gate
segment	human	sens	convolut	guid	classif	structur	answer	fast					patient	differenti	cnn		survei
resolut	transform	instanc	spatial	joint	feder	dynam	attribut	singl					evalu	constrain	brain		time
time	video	recognit	represent	learn	learn	recognit	graph	estim					action	design	region		seri
seri	attent	video	unsupervis	detect	reinforc	network	embed	learn					tempor	comput	lesion		forecast
learn	recognit	attent	adapt	tempor	deep	action	knowledg	depth					facial	invers	analysi		classif
forecast	network	learn	domain	predict	polici	learn	predict	object					express	adversari	cluster		multivari
model	learn	network	transfer	caption	control	attent	distil	use					traffic	train	machin		traffic
data	action	action	via	video	multi-ag	video	model	flow					tree	attack	studi		time-seri
network	imag	visual	featur	base	represent	detect	molecular	pose					decis	net	bayesian		approach
classif	tempor	graph	person	analysi	explor	graph	via	video					boost	augment	space		sequenc
multivari	transform	represent	re-identif	relat	transfer	convolut	interact	detect					forest	exampl	ensembl		signal
us	represent	tempor	adversari	visual	us	predict	node	optic					classifi	flow	latent		spatio-tempor
detect	convolut	transform	learn	function	agent	human	relat	monocular					support	optic	evalu		reinforc
deep	visual	imag	recognit	filter	model-bas	deep	properti	deep					markov	color	variabl		control
neural	resolut	convolut	self-supervis	applic	invers	neural	messag	unsupervis						motion	matrix		explor
predict	human	via	supervis	multipl	reward	represent	pass	imag						sens	process		continu
analysi	multi	model	deep	game	continu	us	reason	motion						remot	tree		multi-ag
anomali	caption	featur	data	explain	optim	facial	tempor	network						sequenc	decis		environ
transform	super	human	gener	dynam	via	person	heterogen	imag						inform	gaussian		invers
cluster	deep	scene	classif	interpret	environ	featur	us	video						memori	markov		onlin
approach	featur	local	segment	valu	effici	motion	inform	singl						vehicl	random		reward
base	motion	text	visual	aggreg	onlin	re-identif	infer	human						embed	explan		agent
estim	imag	imag	reinforc	network	imag	gener	adapt	segment						contrast	kernel		segment
depth	learn	learn	deep	neural	segment	imag	domain	imag						factor	regress		semant
learn	data	classif	represent	graph	network	network	person	use						multi-view	boost		medic
imag	deep	us	polici	convolut	semant	adversari	re-identif	base						multi-task	differenti		instanc
network	adapt	deep	transfer	deep	super-resolut	us	unsupervis	color						activ	valu		supervis
video	domain	base	system	attent	cloud	synthesi	translat	imag						supervis	metric		semi-supervis
pose	segment	detect	control	us	learn	gan	align	scene						weakli	forest		label
flow	transfer	segment	multi-ag	recurr	singl	learn	via	recognit						loss	field		weakli
us	classif	network	dynam	predict	convolut	condit	featur	text						salienc	condit		automat
monocular	base	featur	us	detect	attent	translat	gener	robust						action	adversari		loss
deep	us	neural	agent	spatial	us	super-resolut	transfer	method						text	attack		brain
optic	approach	data	optim	variat	transform	via	image-to-imag	cluster						facial	synthesi		local
unsupervis	detect	recognit	continu	traffic	fusion	model	attent	classif						express	translat		action
human	model	convolut	approach	classif	video	singl	cross-domain	detect						fine-grain	robust		empor
reconstruct	unsupervis	approach	environ	random	instanc	deep	match	activ						pyramid	synthet		human
motion	network	transfer	framework	filter	fast	attent	learn	algorithm						vision	attribut		facial
singl	multi	method	via	ensembl	dens	transfer	bridg	reconstruct						challeng	question		activ
stereo	translat	color	invers	method	enhanc	transform	cross-mod	framework							answer		express
self-supervis	featur	algorithm	autonom	propag	via	unsupervis	adversari	adapt							exampl		motion
object	analysi	automat	space	autoencod	resolut	image-to-imag	spatial	inform							recognit		global
segment	learn	estim	neural	learn	detect	network	network	learn							supervis		detect
imag	represent	network	network	imag	object	attent	neural	network							text		joint
network	detect	learn	convolut	deep	salient	imag	graph	deep							weakli		fine-grain
semant	visual	imag	deep	segment	network	visual	convolut	graph							retriev		represent
learn	supervis	depth	graph	classif	track	video	deep	neural							encod		self-supervis
deep	imag	us	architectur	survei	featur	transform	attent	data							large-scal		contrast
convolut	unsupervis	object	train	us	detector	segment	us	adversari							context		few-shot
medic	object	detect	via	data	sens	scene	recurr	generat							understand		studi
cloud	challeng	video	search	transfer	dataset	recognit	structur	model							pre-train		perform
us	video	deep	filter	approach	video	graph	dynam	use							fine-grain		dataset
attent	train	flow	transfer	system	remot	learn	effici	model							global		object
supervis	gener	pose	classif	base	anomali	text	train	represent							framework		anomali
neural	model	cloud	bayesian	method	real-tim	caption	hierarch	detect							select		salient
semi-supervis	languag	scene	improv	semant	cloud	object	learn	via							spars		detector
transform	self	neural	recurr	network	autonom	convolut	adapt	variat							augment		context
instanc	graph	unsupervis	compress	medic	drive	us	kernel	network							multipl		real-tim
classif	reinforc	segment	visual	detect	vehicl	detect	gate	reinforc							novel		multipl
weakli	machin	monocular	prune	enhanc	deep	semant	architectur	predict							extract		accur
base	natur	optic	optim	label	fusion	gener	spatial	latent							integr		flow
via	data	predict	kernel	explain	imageri	languag	survei	explan							code		pose
learn	model	model	detect	learn	imag	segment	time	learn							loss		optic
reinforc	network	learn	object	reinforc	segment	imag	seri	tree							architectur		monocular
deep	gener	detect	salient	deep	us	network	forecast	machin							search		field
control	gan	transform	network	polici	deep	deep	classif	decis							compress		stereo
us	learn	imag	track	optim	medic	learn	multivari	deep							prune		multi-view
via	adversari	us	attent	explor	classif	semant	predict	data							filter		normal
model	optim	languag	featur	effici	color	convolut	data	use							spectral		complet
transfer	neural	deep	video	gradient	base	us	model	approach							acceler		track
multi-ag	estim	neural	segment	algorithm	approach	neural	traffic	classif							action		sens
polici	train	object	supervis	multi-ag	automat	classif	base	algorithm							human		autonom
dynam	cluster	effici	real-tim	control	detect	medic	time-seri	explain							optic		drive
network	data	train	cloud	distribut	survei	cloud	approach	model							pose		remot
system	robust	gener	weakli	environ	semi-supervis	base	cluster	interpret							facial		vehicl
agent	deep	architectur	learn	sampl	activ	detect	tempor	seri							motion		challeng
environ	regular	via	fusion	linear	cnn	supervis	transform	random							express		benchmark
gener	via	search	local	model-bas	brain	transform	dynam	method							frame		fusion
represent	us	toward	detector	function	region	attent	sequenc	featur							event		imageri
approach	spectral	transfer	adapt	continu	semant	model	signal	tree							hand		large-scal
base	structur	natur	visual	q-learn	structur	instanc	analysi	time							skeleton-bas
invers	kernel	comput	base	onlin	lesion	graph	spatio-tempor	vector							depth
learn	learn	graph	time	adapt	learn	adversari	learn	learn							monocular
represent	graph	network	seri	domain	data	network	reinforc	reinforc							reconstruct
graph	represent	learn	learn	via	deep	gener	deep	polici							stereo
unsupervis	predict	neural	forecast	local	analysi	learn	transfer	optim							multi-view
via	embed	represent	classif	explan	cluster	neural	control	via							complet
deep	network	embed	multivari	featur	machin	detect	via	deep							guid
recognit	supervis	predict	data	represent	classif	attack	approach	gradient							joint
self-supervis	knowledg	knowledg	model	graph	method	data	polici	effici							consist
contrast	self	via	method	visual	applic	deep	dynam	explor							shape
video	neural	convolut	anomali	robust	estim	graph	optim	valu							light
reinforc	deep	gener	deep	space	studi	robust	explor	algorithm
transfer	contrast	molecular	detect	cluster	transfer	model	continu	control
visual	distil	classif	cluster	cloud	bayesian	us	system	off-polici
imag	via	model	us	model	algorithm	train	multi-ag	q-learn
gener	classif	node	algorithm	gener	space	classif	environ	linear
featur	attent	attent	time-seri	estim	ensembl	gan	invers	function
data	data	structur	base	approach	latent	improv	onlin	approxim
inform	us	us	transform	sampl	evalu	imag	distribut	markov
embed	model	messag	regress	base	variabl	convolut	reward	process
predict	node	properti	analysi	scalabl	matrix	explan	agent	sampl
network	learn	model	learn	learn	learn	learn	segment	learn
neural	reinforc	learn	reinforc	optim	process	adapt	imag	represent
convolut	deep	gener	polici	us	tree	domain	semant	re-identif
deep	model	network	optim	neural	decis	imag	us	unsupervis
graph	us	variat	gradient	reinforc	machin	unsupervis	medic	person
learn	predict	deep	via	process	gaussian	represent	classif	recognit
us	bas	structur	deep	stochast	markov	segment	base	graph
architectur	gener	us	robust	model	random	person	cloud	deep
imag	system	infer	sampl	control	explan	re-identif	instanc	transfer
train	agent	process	estim	regular	kernel	gener	supervis	domain
via	network	represent	method	bayesian	regress	transfer	transform	visual
detect	control	data	algorithm	differenti	boost	classif	semi-supervis	self-supervis
classif	machin	latent	function	constrain	differenti	featur	label	via
effici	benchmark	causal	explor	design	valu	via	interact	classif
search	game	seri	network	comput	metric	few-shot	weakli	attent
optim	experi	gaussian	effici	unsupervis	forest	deep	automat	adapt
recurr	tempor	time	valu	search	variat	detect	map	base
prune	adversari	bayesian	approxim	applic	field	adversari	loss	contrast
transform	multi	neural	bound	gradient	estim	network	brain	match
model	approach	graph	distribut	invers	condit	semant	local	embed
model	imag	detect	visual	adversari	gener	object	recognit	imag
learn	network	object	imag	gener	adversari	detect	video	adversari
gener	resolut	network	odel	network	network	estim	action	generat
graph	super	salient	video	train	imag	learn	attent	network
deep	gener	featur	attent	data	gan	depth	empor	learn
variat	us	attent	gener	neural	us	track	local	use
network	adversari	supervis	languag	deep	condit	monocular	predict	network
process	cloud	video	transform	attack	model	segment	human	generat
structur	deep	weakli	scene	us	attack	imag	facial	synthesi
causal	learn	track	segment	model	synthesi	pose	activ	super-resolut
latent	singl	segment	natur	robust	train	us	express	via
infer	color	learn	text	condit	data	cloud	motion	deep
neural	flow	local	represent	transfer	translat	network	global	imag
represent	depth	via	caption	net	robust	deep	dynam	singl
data	complet	anomali	understand	augment	synthet	autonom	spatio-tempor	condit
gaussian	synthesi	detector	semant	adapt	attribut	drive	detect	translat
us	convolut	rgb-d	network	exampl	question	video	framework	gan
autoencod	via	fusion	graph	optim	detect	gener	base	unsupervis
bayesian	neural	cloud	toward	comput	answer	fusion	joint	segment
via	unsupervis	adapt	via	ensembl	exampl	real-tim	fine-grain	scene
detect	learn	learn	model	video	recognit	learn	learn	learn
object	identif	reinforc	data	imag	supervis	reinforc	represent	reinforc
network	re	deep	time	learn	attent	represent	deep	deep
learn	person	via	represent	flow	text	deep	unsupervis	via
salient	represent	represent	structur	us	transform	model	via	control
attent	adversari	transfer	process	represent	local	via	transfer	multi-agent
featur	variat	polici	seri	unsupervis	scene	gener	graph	model
deep	graph	control	latent	optic	weakli	unsupervis	self-supervis	agent
video	shot	multi-ag	gaussian	color	visual	graph	data	imit
supervis	adapt	explor	causal	visual	classif	transfer	contrast	model-base
segment	network	us	variat	classif	network	us	semi-supervis	transfer
imag	attent	dynam	deep	motion	retriev	contrast	featur	traffic
cloud	domain	agent	infer	deep	encod	inform	classif	base
local	gener	environ	via	base	large-scal	self-supervis	structur	effici
weakli	autoencod	hierarch	spars	sens	context	explor	improv	hierarch
us	model	model	analysi	dynam	understand	visual	few-shot	adversari
via	featur	reward	bayesian	recognit	pre-train	video	machin	polici
rgb-d	via	continu	approach	segment	fine-grain	predict	framework	signal
neural	deep	invers	factor	remot	semant	polici	embed	use
base	encod	task	featur	semant	global	reward	activ	dynam
visual	network	learn	predict	predict	featur	learn	us	detect
transform	neural	person	learn	network	base	tree	data	object
attent	graph	re-identif	deep	model	robust	decis	predict	network
imag	convolut	represent	data	us	transform	data	model	segment
video	deep	unsupervis	model	gener	framework	model	classif	salient
languag	learn	featur	us	deep	improv	machin	augment	network
model	attent	adapt	health	human	effici	us	method	deep
recognit	gener	via	machin	video	model	classif	analysi	video
learn	us	deep	interpret	neural	select	time	base	learn
us	predict	base	analysi	sequenc	spars	featur	framework	track
vision	recurr	domain	represent	estim	augment	predict	interpret	base
scene	train	contrast	explan	attent	local	seri	featur	neural
detect	structur	attent	record	inform	multipl	explain	studi	attent
graph	via	inform	futur	base	novel	algorithm	evalu	real-time
caption	model	discrimin	electron	memori	sampl	deep	explain	fusion
network	adversari	match	explain	adversari	extract	interpret	perform	semant
via	filter	retriev	method	recurr	integr	explan	dataset	cloud
segment	effici	disentangl	clinic	vehicl	visual	boost	toward	detector
gener	classif	cross-mod	patient	sampl	code	optim	approach	visual
text	embed	local	evalu	pose	loss	network	automat	use
learn	learn	learn	recognit	learn	network	detect	detect	learn
tree	reinforc	adapt	action	graph	neural	imag	object	time
decis	polici	data	learn	represent	graph	object	anomali	optim
model	optim	domain	network	via	convolut	us	featur	data
machin	gradient	represent	video	embed	deep	base	network	seri
us	model	unsupervis	attent	self-supervis	architectur	dataset	video	featur
data	effici	gener	tempor	contrast	search	learn	salient	tensor
predict	explor	detect	convolut	neural	train	segment	supervis	algorithm
interpret	via	adversari	base	network	attent	color	local	tempor
explain	sampl	object	facial	unsupervis	recurr	recognit	attent	network
explan	deep	imag	human	predict	via	video	detector	latent
classif	algorithm	segment	us	model	differenti	method	cloud	via
boost	function	transfer	graph	adapt	compress	model	segment	analysi
featur	stochast	via	represent	dynam	effici	classif	fast	kernel
deep	approxim	semant	motion	factor	structur	benchmark	weakli	transport
algorithm	method	self-supervis	express	multi-view	kernel	deep	context	select
reinforc	valu	graph	pose	semi-supervis	prune	challeng	transform	low-rank
optim	process	classif	person	multi-task	filter	data	real-tim	factor
method	control	network	activ	augment	spectral	adapt	multipl	represent
via	bound	supervis	detect	activ	acceler	featur	accur	unsupervis
imag	gener	learn	network	learn	recognit	learn	estim	neural
segment	adversari	deep	neural	improv	action	reinforc	depth	network
us	imag	reinforc	predict	model	human	deep	flow	graph
base	network	detect	us	deep	video	system	pose	learn
learn	learn	system	graph	supervis	flow	network	optic	deep
detect	gan	us	deep	regular	estim	control	human	network
classif	recognit	data	convolut	detect	optic	us	monocular	convolut
color	synthesi	network	attent	machin	pose	optim	video	via
featur	us	machin	model	us	us	model	reconstruct	effici
deep	transfer	base	time	cloud	facial	multi-ag	us	use
approach	model	model	forecast	fast	motion	polici	scene	attent
algorithm	condit	framework	gener	via	predict	via	field	train
cloud	attribut	survei	seri	data	base	transfer	motion	architectur
transform	via	applic	detect	weakli	express	agent	cloud	imag
data	deep	adversari	recurr	interpret	frame	distribut	joint	search
cluster	edit	approach	traffic	local	event	approach	stereo	cloud
model	dataset	time	base	loss	tempor	dynam	multi-view	compress
automat	text	neural	dynam	salienc	activ	base	guid	fast
method	attack	activ	approach	linear	hand	graph	normal	model
estim	featur	imag	adversari	regress	skeleton-bas	onlin	complet	prune
learn	time	learn	tree	recognit	depth	learn	detect	detect
reinforc	seri	network	decis	attent	estim	estim	object	segment
polici	model	gradient	machin	action	monocular	imag	track	object
optim	learn	optim	us	transform	reconstruct	network	dataset	learn
deep	network	reinforc	model	text	scene	depth	sens	imag
gradient	data	polici	data	video	stereo	video	autonom	semant
via	forecast	train	featur	visual	us	super-resolut	drive	network
effici	classif	neural	classif	facial	field	deep	imag	attent
algorithm	process	deep	algorithm	scene	pose	flow	remot	medic
explor	detect	estim	random	network	deep	us	vehicl	domain
sampl	us	gener	boost	local	multi-view	optic	base	deep
control	neural	via	predict	express	self-supervis	singl	us	via
approxim	predict	method	forest	effici	complet	unsupervis	challeng	unsupervis
function	deep	distribut	classifi	tempor	guid	pose	system	semi-supervis
method	multivari	model	base	fine-grain	joint	monocular	benchmark	featur
off-polici	graph	stochast	support	pyramid	consist	reconstruct	fusion	adapt
distribut	gaussian	sampl	interpret	convolut	match	scene	imageri	supervis
valu	anomali	regular	markov	featur	shape	motion	visual	classif
multi-ag	gener	adversari	gradient	vision	light	neural	large-scal	few-shot
linear	transform	converg	method	challeng	motion	via	vision	weak
